1  
2  
3 **Differential coexistence of multiple genotypes of *Ophiocordyceps***  
4 ***sinensis* in the stromata, ascocarps and ascospores of natural**  
5 ***Cordyceps sinensis***

6  
7 Yu-Ling Li<sup>1,¶</sup>, Xiu-Zhang Li<sup>1,¶</sup>, Yi-Sang Yao<sup>2,¶</sup>, Zi-Mei Wu<sup>3</sup>, Ling Gao<sup>2</sup>, Ning-Zhi Tan<sup>2</sup>, Zhou-Qing Luo<sup>3,#</sup>,  
8 Wei-Dong Xie<sup>2</sup>, Jian-Yong Wu<sup>4,5</sup>, Jia-Shi Zhu<sup>1,2,\*</sup>

9  
10 <sup>1</sup> State Key Laboratory of Plateau Ecology and Agriculture, Qinghai Academy of Animal and Veterinary  
11 Sciences, Qinghai University, Xining, Qinghai, China

12  
13 <sup>2</sup> Shenzhen Key Laboratory of Health Science and Technology, Institute of Biopharmaceutical and  
14 Health Engineering, Shenzhen International Graduate School, Tsinghua University, Shenzhen 518055,  
15 China

16  
17 <sup>3</sup> School of Life Sciences, Tsinghua University, Beijing, China

18  
19 <sup>4</sup> State Key Laboratory of Chinese Medicine and Molecular Pharmacology, Shenzhen 518057,  
20 Guangdong, China

21  
22 <sup>5</sup> Department of Applied Biology and Chemistry Technology, The Hong Kong Polytechnic University,  
23 Hong Kong

24  
25 <sup>#</sup>Current address: State Key Laboratory of Cellular Stress Biology, School of Life Sciences, Faculty of  
26 Medicine and Life Sciences, Xiamen University, Xiamen 361102, China

27  
28 \* Corresponding author

29 E-mail: [zhujosh@163.com](mailto:zhujosh@163.com) (JSZ)

30  
31 <sup>¶</sup> These authors contributed equally to this work.

32

## 33 Abstract:

34 **Objective:** To examine the differential occurrence of *Ophiocordyceps sinensis* genotypes in the stroma,  
35 stromal fertile portion (SFP), and ascospores of natural *Cordyceps sinensis*. **Methods:** Immature and  
36 mature *C. sinensis* were harvested. Mature *C. sinensis* were continuously cultivated in our laboratory  
37 (altitude 2,200 m). The SFPs (with ascocarps) and ascospores of *C. sinensis* were collected for microscopic  
38 and molecular analyses using species-/genotype-specific primers. **Results:** Fully and semi-ejected  
39 ascospores were collected from the same specimens. The semi-ejected ascospores tightly adhered to the  
40 surface of the asci. The multicellular heterokaryotic ascospores showed uneven staining of nuclei. The  
41 ascospores were found to contain several genotypes of *O. sinensis*, *Samsoniella hepiali*, and an  
42 AB067719-type fungus. The genotypes within AT-biased Cluster-A occurred in all compartments of *C.*  
43 *sinensis*, but those within AT-biased Cluster-B were absent in the ascospores. Genotypes #13–14 of *O.*  
44 *sinensis* occurred differentially in fully and semi-ejected ascospores, which featured DNA segment  
45 substitutions and genetic material recombination between the genomes of the parental fungi, *Hirsutella*  
46 *sinensis* and the AB067719-type fungus. These offspring genotypes combined with varying abundances  
47 of *S. hepiali* in the 2 types of ascospores participated in the control of the development, maturation and  
48 ejection of the ascospores. **Conclusion:** Multiple genotypes of *O. sinensis* coexist differentially in the SFP  
49 and 2 types of *C. sinensis* ascospores, along with *S. hepiali* and the AB067719-type fungus. The fungal  
50 components in different combinations and their dynamic alterations in the compartments of *C. sinensis*  
51 during maturation play symbiotic roles in the lifecycle of natural *C. sinensis*.

52 **Keywords:** natural *Cordyceps sinensis*; ascospores; stromal fertile portion (ascocarps); transition mutant  
53 genotypes of *Ophiocordyceps sinensis*; *Hirsutella sinensis* (Genotype #1 of *O. sinensis*); multicellular  
54 heterokaryon; *Samsoniella hepiali* (synonym *Paecilomyces hepiali*); AB067719-type fungus

## 56 Introduction

57 Natural *Cordyceps sinensis* is one of the most highly valued therapeutic agents in traditional Chinese  
58 medicine (TCM) and has been used for centuries in clinics as a folk medicine for “Yin-Yang” double  
59 invigoration, health maintenance, disease amelioration, and post-disease/surgery recovery [1–2]. Modern  
60 pharmacological studies have validated the therapeutic profile and lifespan-extending properties of natural  
61 *C. sinensis* and its mycelial fermentation products [2–6]. The Chinese Pharmacopeia defines natural *C.*  
62 *sinensis* as an insect-fungal complex consisting of the fruiting body of *Ophiocordyceps sinensis* and a  
63 dead Hepialidae moth larva, *i.e.*, natural *C. sinensis* ≠ *O. sinensis* fungus [7–12]. Studies have reported  
64 that the caterpillar body of *C. sinensis* contains intact larval intestine and head tissues, an intact, thick  
65 larval body wall and numerous bristles, and fragments of other larval tissues [8–12]. The controversy

66 surrounding the indiscriminate use of Latin names (*Cordyceps sinensis* and *Ophiocordyceps sinensis* since  
67 2007) for the natural insect-fungal complex and multiple anamorphic-teleomorphic fungi has been  
68 addressed both in Chinese and English [7–12]. In this paper, we temporarily refer to the fungus/fungi as  
69 *O. sinensis* and continue the customary use of the name *C. sinensis* for the wild or cultivated insect-fungal  
70 complex, although this practice will likely be replaced by the discriminative use of exclusive Latin names  
71 in the future.

72 Natural *C. sinensis* grows only in alpine areas at altitudes above 3,000–3,500 m on the Qinghai-  
73 Tibetan Plateau and has a complex lifecycle [2,12–14]. Its maturation stages, which have been used as a  
74 market standard for grading the quality of natural *C. sinensis*, greatly impact its mycobiota profile,  
75 metagenomic polymorphism, metatranscriptomic and proteomic expression, chemical constituent  
76 fingerprint, competitive proliferation of *Hirsutella sinensis*-like fungi, and therapeutic efficacy and  
77 potency as a natural therapeutic agent [7–10,12,14–28]. Mycologists have identified 22 species from 13  
78 fungal genera in this insect-fungal complex [29], and culture-independent molecular methodologies have  
79 identified >90 fungal species spanning more than 37 genera and 12 genotypes of *O. sinensis* and  
80 demonstrated the predominance of different fungi and metagenomic fungal diversity in the stroma and  
81 caterpillar body of natural and cultivated *C. sinensis* [7–12,15–18,23–24,26–43].

82 Wei et al. [44] hypothesized that *H. sinensis* is the sole anamorph of *O. sinensis*. This hypothesis was  
83 primarily based on 3 lines of evidence: (1) frequent isolation and mycological identification according to  
84 sporulation, conidial morphology and growth characteristics [29]; (2) the microcycle conidiation of  
85 ascospores [45–47]; and (3) systematic molecular analyses *via* internal transcribed spacer (ITS)  
86 sequencing and random molecular marker polymorphism assays [25,33–37,44,48–49]. Wei et al. [50]  
87 reported an industrial artificial cultivation project and demonstrated a mismatch between the inoculants of  
88 3 GC-biased Genotype #1 *H. sinensis* strains and a sole teleomorphic fungus (AT-biased Genotype #4 of  
89 *O. sinensis*) in the fruiting body of cultivated *C. sinensis*. The sequences of the AT-biased genotypes of  
90 *O. sinensis* are absent in the genome of GC-biased Genotype #1 *H. sinensis* and belong to independent *O.*  
91 *sinensis* fungi [7–12,24,30–31,43,51–56]. Thus, according to the fourth criterion of Koch’s postulates, the  
92 species contradiction between the anamorphic inoculants and the teleomorph in cultivated products  
93 disproves the sole anamorph hypothesis for *H. sinensis* that was proposed by Wei et al. [44] of the same  
94 research group 10 years ago. The teleomorphs of *O. sinensis* found in natural *C. sinensis* specimens  
95 collected from geographically distant areas and cultivated *C. sinensis* reportedly belong to Genotypes #1,  
96 #2, #3, #4, #5 or #7 [27–28,32–37,44,48–49,57–60], whereas those found in ascospores of *C. sinensis*  
97 reportedly belong to both GC-biased Genotype #1 and AT-biased Genotype #5 of *O. sinensis* fungi [61].  
98 In addition to the report of species contradiction between the anamorphic inoculants (GC-biased Genotype  
99 #1) and teleomorphs (AT-biased Genotype #4) in cultivated *C. sinensis*, Wei et al. [50] also identified  
100 teleomorphic Genotype #1 of *O. sinensis* in natural *C. sinensis*. Because the majority of the fungal species

101 present in the natural world are most likely nonculturable [62–64], culture-independent molecular  
102 approaches have been widely used, resulting in the identification of 12 genotypes of *O. sinensis* and many  
103 other fungi from natural and cultivated *C. sinensis* in previous studies [7–12,16–  
104 18,24,27–28,30–37,48,50,56–61,65–67].

105 In this study, natural *C. sinensis* specimens were collected from the Hualong and Yushu areas of  
106 Qinghai Province and cultivated continuously in our laboratory in Xining city (altitude of 2,200 m). The  
107 histology of the stromal fertile portion (SFP) that was densely covered with ascocarps and ascospores of  
108 *C. sinensis* was examined under optical, confocal and fluorescence microscopes. Multiple genotypes of  
109 *O. sinensis* and other *C. sinensis*-associated fungi were profiled in the immature and mature stromata,  
110 fertile portion of the mature stroma and 2 types of ascospores of natural *C. sinensis* using species- and  
111 genotype-specific PCR primers, amplicon sequencing and cloning-based sequencing approaches.

## 112 **Materials and Methods**

### 113 **Collection of *C. sinensis* specimens and ascospores**

114 Immature *C. sinensis* specimens were collected from the Hualong and Yushu areas of Qinghai  
115 Province of China in mid-May and characterized by a plump caterpillar body and a very short stroma  
116 (1.0–2.0 cm) [19,27]. Mature *C. sinensis* specimens were collected in mid-June along with the outer  
117 mycelial cortices and soil surrounding the caterpillar body; these specimens were characterized by a plump  
118 caterpillar body and a long stroma (>5.0 cm) and by the formation of an expanded fertile portion close to  
119 the stroma tip, which was densely covered with ascocarps.

120 Mature specimens were replanted in paper cups in soil obtained from *C. sinensis* production areas  
121 (left panel of Fig 1) and were cultivated in our laboratory (altitude 2,200 m) in Xining City, Qinghai  
122 Province of China, with the windows left open and under conditions with sufficient watering, sunshine  
123 and ventilation [68–69]. Fully ejected ascospores of *C. sinensis* were collected using autoclaved weighing  
124 papers (right panel of Fig 1). During massive ascospore ejection, many ascospores adhered to the outer  
125 surface of asci (referred to as semi-ejected ascospores) and failed to be brushed off using autoclaved  
126 brushes; hence, these ascospores were instead gently scratched off using a disinfected inoculation shovel  
127 or ring and labeled as the semi-ejected ascospores.

128 The 2 types of ascospores were cleaned by 2 washes with 10% and 20% sucrose solutions and 10-  
129 min centrifugation at 1,000 rpm; the supernatant was discarded after each centrifugation. The pellets  
130 (ascospores) were subsequently washed with 50% sucrose solution and centrifuged for 30 min, and the  
131 ascospores that floated on the liquid were collected [68].

### 132 **Histological examination of the SFP, ascocarps and ascospores of *C.***

## 133 *sinensis*

134 The fully ejected ascospores of *C. sinensis* were diluted in normal saline, placed on a glass slide, and  
135 air-dried for histological examination under an optical microscope (Model BX51, OLYMPUS, Japan)  
136 without staining. The ascospores were fixed on a glass slide with 4% paraformaldehyde for 1 h, incubated  
137 in 0.01% calmodulin for 5 min for the visualization of septa, washed 3 times with PBS, and observed  
138 under a fluorescence microscope with UV epi-illumination (Model XZ51, OLYMPUS, Japan) [69].

139 The mature *C. sinensis* stromata collected during the massive ejection of ascospores were immersed  
140 in 10% formalin for fixation and subjected to dehydration in 50%, 70% and 95% ethanol for 1 h each [70].  
141 The SFP tissues (densely covered with ascocarps) were embedded in paraffin and sliced to a 5- $\mu$ m  
142 thickness. The ascus slices were stained with hematoxylin-eosin and observed under optical and confocal  
143 microscopes (Model Primo Star and Model LSM780, ZEISS, Germany).

## 144 **Extraction and preparation of genomic DNA**

145 The test samples, including the stroma, SFP (densely covered with ascocarps), and ascospores of *C.*  
146 *sinensis*, were individually ground to a powder in liquid nitrogen. The mycelia of pure fungi, including *H.*  
147 *sinensis* and *Samsoniella hepiali* (synonym *Paecilomyces hepiali*; [71]) (gifts from Prof. Guo, Y.-L. [26]),  
148 *Geomyces pannorum*, *Penicillium chrysogenum* and *Pseudogymnoascus roseus* (gifts from Prof. Zhang,  
149 Y.-J.), and *Tolyptocladium sinensis* (provided by Prof. Wu, J.-Y.), were also individually ground to a  
150 powder in liquid nitrogen; these fungi have been frequently detected in natural *C. sinensis*, and some of  
151 them reportedly show differential dominance in the stroma and caterpillar body of *C. sinensis*  
152 [23,26–29,32,36,38–41,72–74]. Genomic DNA was individually extracted from these powder samples  
153 using the DNeasy Plant Mini Kit (Qiagen) [19,26].

## 154 **Universal primers and genotype- and species-specific primers**

155 Table 1 lists the sequences of the *IST5/ITS4* universal primers and the genotype-specific primers for  
156 GC- and AT-biased genotypes of *O. sinensis*. The positions of the primers are shown in Fig 2.

157 Among multiple pairs of species-specific primers that were designed for *G. pannorum*, *H. sinensis*,  
158 *P. chrysogenum*, *P. roseus*, *S. hepiali* and *T. sinensis*, the following primer pairs were selected according  
159 to their specificity and amplification efficiency examined through PCR amplification and sequencing  
160 using the genomic DNA templates isolated from the fungal mycelia (listed in Table 1): *Prp2/Prp5* for *G.*  
161 *pannorum* and *P. roseus*, *Pcp3/Pcp7* for *P. chrysogenum*, *Php4/Php6* for *S. hepiali*, and *Tsp1/Tsp3* for *T.*  
162 *sinensis*. The ITS sequences of *P. roseus* (AY608922) and *G. pannorum* (JF320819 and DQ189229) are  
163 98–99% homologous and were amplified using the same pair of primers, *Prp2/Prp5* (Table 1).

---

## 164 **PCR protocol for the amplification of ITS segments**

165 The genomic DNA templates and aforementioned universal, genotype- and species-specific primers  
166 were used in PCR assays to amplify the ITS1-5.8S-ITS2 segments using the following touch-down  
167 protocol: (1) 95°C for 5 min; (2) 36 cycles of 95°C for 30 sec, annealing temperature for 30 sec (the  
168 annealing temperature was initially set to 70°C and decreased stepwise by 0.3°C in each cycle), and 72°C  
169 for 1 min; (3) 72°C for 10 min and maintained at 4°C [26–27]. The PCR amplicons were examined by  
170 agarose gel electrophoresis and sequencing.

## 171 **Amplicon sequencing, cloning-based sequencing and sequence analysis**

172 Each of the targeted PCR amplicons obtained from the aforementioned genomic DNA templates was  
173 recovered from agarose gels using a Gel Extraction Kit (Omega Bio-Tek, Norcross, GA, USA) and  
174 purified using a Universal DNA Purification kit (TIANGEN) [26–27]. The purified amplicons were  
175 examined by *Eco*RI endonuclease digestion, which specifically digested the GC-biased genotypes of *O.*  
176 *sinensis* but not the AT-biased genotypes (*cf.* the underlined “GAATTC” site in green shown in Fig 2) and  
177 analyzed by agarose gel electrophoresis. The purified amplicons were sequenced either directly or after  
178 cloning.

179 For cloning, the amplicon was inserted into a PCR2.1 vector (SHQIMBIO, Shanghai, China), which  
180 was then transfected into DH5 $\alpha$  cells, and the cells were coated on agar containing 100  $\mu$ g/ml ampicillin  
181 or kanamycin in Petri dishes. The Petri dishes were cultured at 37°C, allowing the growth of cells; 30  
182 white colonies were selected per dish, transferred to liquid culture medium and grown at 37°C in a shaking  
183 incubator. The expanded clones were sequenced using the M13F/M13R primers (*cf.* Table 1) (Invitrogen  
184 or Beijing Bomaide Technology Co.). The sequences were analyzed using Vector NTI Advance 9 software  
185 (Invitrogen) [26–27].

## 186 **Phylogenetic analysis of ITS sequences**

187 All 17 genotypes of *O. sinensis* available in the GenBank database and obtained from this study were  
188 analyzed to reveal their phylogenetic relationships. A Bayesian majority-rule consensus tree was inferred  
189 using MrBayes v3.2.7a software (the Markov chain Monte Carlo [MCMC] algorithm;  
190 <http://nbisweden.github.io/MrBayes/>) with a sampling frequency of 10<sup>3</sup> iterations after discarding the first  
191 25% of samples from a total of 1.1x10<sup>8</sup> iterations [75].

## 192 **Results**



---

## 193 **Two types of *C. sinensis* ascospores**

194 To mimic the wild environment of the Qinghai-Tibet Plateau, mature *C. sinensis* specimens were  
195 cultivated in paper cups in our Xining laboratory (altitude 2,200 m) (left panel of Fig 1). White ascospores  
196 started to become visible on the surface of asci after approximately one week of cultivation. The fully  
197 ejected ascospores were collected on autoclaved weighing paper, and the semi-ejected ascospores that  
198 tightly adhered to the outer surface of asci (right panel of Fig 1) were collected by gentle scraping using a  
199 disinfected inoculation shovel or ring [68].

## 200 **Microscopy observations of the SFPs, ascocarps and ascospores of *C.*** 201 ***sinensis***

202 Fig 3 shows the histology of the fully ejected *C. sinensis* ascospores without staining (upper panel;  
203 40x) and after staining with calmodulin to visualize the septa of the multicellular structure of the  
204 ascospores (lower panel; 400x).

205 Panel 4A of Fig 4 shows a confocal image (bar, 500  $\mu\text{m}$ ) of a transverse section of the fertile portion  
206 of the *C. sinensis* stroma, which is densely covered with multiple ascocarps. Panel 4B shows an optical  
207 microscopy image (10x) of several ascocarps, and Panel 4C shows a close-up optical microscopy image  
208 (40x) of an ascocarp. Ascocarps were stained with hematoxylin-eosin containing multiple ascospores,  
209 which revealed uneven staining of nuclei (dark blue–purple), consistent with the multicellular  
210 heterokaryosis of the *C. sinensis* ascospores reported by Bushley et al. [76]. Panels 4D and 4E provide  
211 confocal images close to the opening of the perithecia, showing ascospores gathering toward the opening  
212 of the perithecium (4D; bar, 50  $\mu\text{m}$ ) and a semi-ejected ascospore hanging out and adhered to the opening  
213 of the perithecium (4E; bar, 20  $\mu\text{m}$ ).

## 214 **ITS sequences amplified using universal primers**

215 ITS sequences were amplified from the immature and mature stroma, SFP (with ascocarps), and fully  
216 and semi-ejected ascospores of *C. sinensis* using the universal primers *ITS5/ITS4*. The targeted amplicons  
217 of 630+ bp are 99% homologous to sequence AB067721 of *H. sinensis* (Genotype #1 of *O. sinensis*)  
218 [18,23–24,26–27,33,35,37,44,48].

## 219 **ITS sequences amplified using species-specific primers**

220 ITS sequences were amplified from the genomic DNA templates obtained from immature and mature  
221 stroma, SFP (with ascocarps), and fully and semi-ejected ascospores of *C. sinensis* using the *S. hepiali*-  
222 specific primers *Php4/Php6*. The targeted amplicons of 460+ bp in the sample lanes shown in Fig 5 were

223 recovered and sequenced, and the sequences were 100% homologous to the EF555097 sequence of *S.*  
224 *hepiali* [26]. As determined through PCR amplification of the same quantity of genomic DNA,  
225 significantly lower abundance of the moieties of the ITS amplicons was obtained after amplification from  
226 genomic DNA of the fully ejected ascospores (lanes 1 and 3 of Fig 5) than after amplification of genomic  
227 DNA of the semi-ejected ascospores (lanes 2 and 4).

228 In other PCR experiments, the ITS sequences of various fungi were amplified from the SFP (with  
229 ascocarps) and fully and semi-ejected ascospores of *C. sinensis* using the following species-specific primer  
230 pairs (cf. Table 1): *Prp2/Prp5* for *G. pannorum* (JF320819) and *P. roseus* (AY608922), *Pcp3/Pcp7* for *P.*  
231 *chrysogenum* (DQ336710), and *Tsp1/Tsp3* for *T. sinensis* (DQ097715) (cf. Table 1). Amplicon sequencing  
232 did not detect the sequences of *G. pannorum*, *P. roseus*, or *T. sinensis*. Agarose gel electrophoresis showed  
233 that the amplicons obtained using the primers *Pcp3/Pcp7* migrated at a speed similar to the positive control  
234 moiety of *P. chrysogenum*, but sequencing analysis did not reveal the ITS sequence of *P. chrysogenum*.  
235 Thus, species-specific PCR primers failed to detect the ITS sequences of *G. pannorum*, *P. chrysogenum*,  
236 *P. roseus*, or *T. sinensis* in the SFP (with ascocarps) and fully and semi-ejected ascospores of *C. sinensis*.

## 237 **Profiling of multiple *O. sinensis* genotypes in the compartments of *C.*** 238 ***sinensis* using a cloning-based sequencing approach**

239 Multiple genotypes of *O. sinensis* were further examined using genomic DNA obtained from the  
240 immature and mature stromata, SFP (with ascocarps), and 2 types of ascospores of *C. sinensis*. Multiple  
241 genotype-specific primers were designed and tested for specificity and amplification efficiency, and 5  
242 pairs were selected for amplification of the ITS1-5.8S-ITS2 sequences of the GC- and AT-biased *O.*  
243 *sinensis* genotypes (cf. Table 1). The universal primers *ITS5/ITS4* and the genotype-specific primers  
244 *Hsprp1/Hsprp3* were highly efficient in amplifying the GC-biased sequences of *O. sinensis* (Genotype #1  
245 *H. sinensis* in this study). The genotype-specific primer pairs *HsATp1/ITS4*, *HsATp1/HsATp2* and  
246 *HsATp1/HsATp3* were selected to amplify the AT-biased sequences of *O. sinensis* (cf. Table 1 and Fig 2).  
247 The PCR amplicons were subjected to cloning-based sequencing to explore the multiple mutant genotypes.

248 The primer pair *HsATp1/ITS4* is highly homologous to almost all AT-biased genotype sequences  
249 (100%/100%) but slightly less homologous to Genotype #5 (100%/95%) and AB067719-type sequences  
250 (95%/100%). The primer pair *HsATp1/HsATp2* is highly homologous to sequences of Genotypes #5, #15  
251 and #17 (100%/100%) but less specific for Genotypes #4 and #16 (100%/80%). The primer pair  
252 *HsATp1/HsATp3* is highly homologous to Genotype #4 and #16 sequences (100%/100%) but less specific  
253 for Genotypes #5, #15 and #17 sequences (100%/85%). The homology of the primer *HsATp1* to the  
254 Genotype #6 sequence is unknown because all Genotype #6 sequences available in GenBank are short,  
255 probably due to the secondary structure/conformation within the ITS1 sequence close to its 5' end and the



256 ITS2 sequence close to its 3' end. The primer *HsATp2* is 100% homologous to sequence EU555436 of  
257 Genotype #6, but *HsATp3* is less specific (85%) for EU555436. Thus, using all of these primer pairs in  
258 multiple PCR runs is essential for ensuring the successful amplification of all known genotypes of *O.*  
259 *sinensis* existing in the stroma, SFP (with ascocarps), and ascospores of *C. sinensis*.

260 Table 2 lists the differential occurrence of the *O. sinensis* genotypes with numerous transition point  
261 mutations detected in the immature and mature stromata, SFP (with ascocarps), and the 2 types of  
262 ascospores of *C. sinensis*. GC-biased Genotype #1 *H. sinensis* was identified in all compartments of *C.*  
263 *sinensis*. GC-biased Genotype #2 of *O. sinensis* was detected in both immature and mature stromata  
264 [27–28].

265 Zhang et al. [57] and Cheng et al. [58] studied *C. sinensis* specimens collected from the Nyingchi  
266 area in Tibet and detected variable *H. sinensis* sequences, which corresponded to Genotype #3 of *O.*  
267 *sinensis* [7–12]. Chen et al. [60] detected a variable *H. sinensis* sequence AJ488254 (Genotype #7 of *O.*  
268 *sinensis*) in the stroma of a *C. sinensis* specimen (#H1023) collected from Qinghai Province of China but  
269 Genotype #1 *H. sinensis* AJ488255 in the caterpillar body of the same specimen. In the current study,  
270 however, GC-biased Genotypes #3 and #7–12 were not detected in any compartments of natural *C.*  
271 *sinensis* collected from the Hualong and Yushu areas of Qinghai Province.

272 The cloning-based ITS amplicon sequencing approach showed the differential occurrence of the AT-  
273 biased sequences of Genotypes #4–6 and #15–17 of *O. sinensis* in the immature and mature stromata, SFP  
274 (with ascocarps), and 2 types of ascospores of *C. sinensis* (cf. Table 2). Table 2 also shows that *S. hepiali*  
275 and the AB067719-type fungus coexisted in the stromata, SFP (with ascocarps), and ascospores of *C.*  
276 *sinensis*.

277 Cloning-based amplicon sequencing also detected Genotypes #13–14 of *O. sinensis*. The Genotype  
278 #13 KT339190 sequence was detected in semi-ejected ascospores, whereas the Genotype #14 KT339178  
279 sequence was detected in fully ejected ascospores (cf. Table 2). Table 3 compares the ITS1, 5.8S gene,  
280 and ITS2 segment sequences of the mutant genotypes with those of Genotype #1 *H. sinensis* (Group-A  
281 [66]) and the AB067719-type Group-E fungus. ITS1 of KT339190 and ITS2 of KT339178 are 100%  
282 homologous to those of Genotype #1 *H. sinensis* (AB067721). The 5.8S-ITS2 segments of KT339190 and  
283 ITS1-5.8S segments of KT339178 are 99–100% homologous to those of the AB067719-type fungus but  
284 64.2–94.9% similar to those of the AB067721 of Genotype #1. As shown in Table 3 and Fig 6, the *O.*  
285 *sinensis* offspring Genotypes #13–14 resulted from large DNA segment reciprocal substitutions and  
286 genetic material recombination between the genomes of the 2 parental fungi, Group-A Genotype #1 *H.*  
287 *sinensis* and the AB067719-type Group-E fungus.

288 AB067719-type fungus in natural *C. sinensis* was grouped as a Group-E fungus by Stensrud et al.  
289 [66], different from *O. sinensis* of Groups A–C. This fungus and 13 other sequences were annotated in the  
290 GenBank database as “*C. sinensis*” or “*O. sinensis*” under GenBank taxon 72228 for *C. sinensis* and *O.*

291 *sinensis*. GenBank also collected more than 900 sequences highly homologous to AB067719, including  
292 *Alternaria* sp., *Ascomycota* sp., *Aspergillus* sp., *Avena* sp., *Berberis* sp., *Colletotrichum* sp., *Cordyceps*  
293 sp., *Cyanonectria* sp., *Dikarya* sp., *Fusarium* sp., *Gibberella* sp., *Hypocreales* sp., *Juglans* sp., *Lachnum*  
294 sp., *Nectria* sp., *Nectriaceae* sp., *Neonectria* sp., *Penicillium* sp., and many uncultured endophytic fungi.  
295 Thus, the identity of AB067719-type fungus in natural *C. sinensis* needs to be further determined through  
296 culture-dependent approaches and multigene and whole genome sequencing of a purified AB067719-type  
297 fungus.

## 298 **Phylogenetic relationship of the genotypes of *O. sinensis***

299 Kinjo & Zang [34] and Stensrud et al. [66] discussed the phylogenetic relationships of Genotype #1  
300 (Group-A) and Genotypes #4–5 (Groups B–C) of *O. sinensis*. Further phylogenetic analysis of mutant  
301 genotypes #1–12 of *O. sinensis*, which share the same *H. sinensis*-like morphological and growth  
302 characteristics, reflected the research progress that had been achieved at the time  
303 [7–12,16–19,25,27–28,57–61]. In this study, we found additional AT-biased Genotypes #15–17 and GC-  
304 biased Genotypes #13–14 that show large DNA segment reciprocal substitutions and genetic material  
305 recombination (*cf.* Tables 2–3 and Fig 6). The sequences of all 17 *O. sinensis* genotypes were subjected  
306 to phylogenetic analysis using a Bayesian algorithm (Fig 7).

307 GC-biased genotypes of *O. sinensis* are indicated in blue alongside the tree in Fig 7, including  
308 Genotypes #1–3 and #8–14 and the ITS sequences from 5 whole-genome sequences of *H. sinensis* strains  
309 1229, CC1406-203, Co18, IOZ07 and ZJB12195.

310 The AT-biased genotypes of *O. sinensis* are indicated in red alongside and cluster into a clade that  
311 contains 2 branches. Cluster-A includes Genotypes #5–6 and #16–17, and Cluster-B includes Genotypes  
312 #4 and #15.

313 The AB067719-type Group-E fungus is side-noted in purple in Fig 7 as an out-group control and is  
314 located outside of the blue GC-biased branch and the red AT-biased genotype clade.

315 Genotype #13 formed a phylogenetic leaf clustered close to the GC-biased branch. This leaf was  
316 distant from one of its parental fungi, Group-A Genotype #1 *H. sinensis*, but farther away from another  
317 parental fungus, the AB067719-type Group-E fungus.

318 Genotype #14 formed another phylogenetic leaf at a position closer to the parental AB067719-type  
319 Group-E fungus than to another parental fungus, Group-A Genotype #1 *H. sinensis*.

320 GC-biased Genotype #1 and AT-biased Genotypes #5–6 and #16, as well as *S. hepiali* and the  
321 AB067719-type fungus, were detected in the ascospores of *C. sinensis*. Genotypes #5–6 and #16 were  
322 located within AT-biased Cluster-A in the Bayesian tree (Fig 7). Genotypes #4 and #15 form AT-biased  
323 Cluster-B in the Bayesian tree and were detected in the stroma and SFP (with ascocarps) but not in the

324 ascospores of *C. sinensis* (cf. Table 2, Fig 7).

## 325 Discussion

326 Natural *C. sinensis* is an insect-fungi complex containing more than 90 cocolonized fungal species  
327 spanning more than 37 genera discovered in mycobiota and metagenomics studies, and 17 genotypes of  
328 *O. sinensis* have been detected in natural *C. sinensis* specimens collected from different production regions  
329 [7–12,16–18,23–24,26–45,50,56–62,67,69,72–74,77].

### 330 Differential occurrence of multiple genotypes of *O. sinensis* and dynamic 331 alterations of the genotypes during *C. sinensis* maturation

332 In addition to the 12 *O. sinensis* genotypes previously discovered  
333 [15–18,24,27–28,30–37,50–61,65–66], the current study identified 5 new genotypes of *O. sinensis*: AT-  
334 biased Genotypes #15–17 with multiple transition point mutations and GC-biased Genotypes #13–14 that  
335 have the characteristics of large DNA segment reciprocal substitutions and genetic material recombination  
336 in natural *C. sinensis*. These genotypes occurred differentially in the stroma, SFP (with ascocarps), and 2  
337 types of ascospores of *C. sinensis* (cf. Table 2). The biomasses of the GC- and AT-biased genotypes  
338 undergo dynamic alterations in an asynchronous, disproportional manner during *C. sinensis* maturation,  
339 as demonstrated using a Southern blotting approach without DNA amplification [18,27].

340 The ITS sequences of Genotype #1 were the most easily amplifiable and detectable using universal  
341 primers, but this finding may not necessarily imply dominance of the Genotype #1 DNA template in the  
342 test samples [7]. Southern blotting analysis without DNA amplification demonstrated that AT-biased  
343 genotypes were dominant in the stroma of natural *C. sinensis* during maturation, and GC-biased Genotype  
344 #1 was never the dominant fungus in the stroma [27–28]. The easy pairing and elongation of the Genotype  
345 #1 ITS sequences using universal primers were observed due to (1) the sequence identity levels and (2)  
346 the absence of secondary structure/conformation in their sequences that could interfere with PCR  
347 amplification and sequencing [7]. In early molecular studies on *C. sinensis* (1999–2006), mycologists  
348 reported the detection of a single sequence of *H. sinensis* and therefore incorrectly judged *H. sinensis* to  
349 be the sole anamorph of *O. sinensis*.

350 Chen et al. [36] first reported the molecular heterogeneity of *C. sinensis*-associated fungi of the genera  
351 *Hirsutella*, *Paecilomyces* and *Tolyocladium* using a PCR amplicon cloning-sequencing methodology.  
352 However, insufficient attention was given to the “all-or-none” qualitative research technique and findings,  
353 and instead, the disproportionate amplicon clones selected for examining the ITS sequences of different  
354 fungi were overemphasized, which unfortunately led to the improper conclusion that *H. sinensis* was the  
355 sole anamorph of *O. sinensis*. As demonstrated herein, we applied multiple pairs of genotype- and species-

356 specific primers and cloning-based amplicon sequencing approaches with a selection of at least 30 white  
357 colonies per Petri dish in cloning experiments, which enabled us to profile the components of the  
358 heterogeneous metagenome in the immature and mature stromata, SFP (with ascocarps), and ascospores  
359 of natural *C. sinensis*. In particular, this approach allowed us to identify those genotypes and fungi with  
360 low abundance and those with secondary structure/conformation in their DNA sequences, which may  
361 affect primer binding and DNA chain elongation during PCR amplification and sequencing [7–10].

362 GC-biased Genotypes #1 and #2 coexisted in the stroma of natural *C. sinensis*, and their amplicon  
363 abundance was low in the immature stroma (1.0–2.0 cm in stromal height) [27–28]. Genotype #1 showed  
364 a greatly elevated abundance in the maturing stroma (4.0–4.5 cm in height without an expanded fertile  
365 portion close to the stromal tip), and its abundance then plateaued in the mature stroma (6.5–7.0 cm in  
366 height, showing the formation of an expanded fertile portion close to the stromal tip, which is densely  
367 covered with ascocarps) (Fig 8; modified from Fig 6 of [28]). In contrast to the maturation pattern of  
368 Genotype #1, the abundance of Genotype #2 remained at a low level in the maturing stroma and increased  
369 markedly in the mature stroma to levels that greatly exceeded the abundance of Genotype #1. The  
370 cooccurrence of Genotypes #1 and #2 in the stroma with distinct maturation patterns indicates the genomic  
371 independence of the 2 GC-biased genotypes, which is proven by the absence of Genotype #2 sequences  
372 in the whole-genome sequences of 5 Genotype #1 *H. sinensis* strains [7–12,30–31,51–56].

373 In this study, we did not detect GC-biased Genotypes #3 and #7–12 of *O. sinensis* in the compartments  
374 of natural *C. sinensis* specimens collected from the Hualong and Yushu areas of Qinghai Province.  
375 Genotype #3 was detected in natural *C. sinensis* specimens collected from Nyingchi in Tibet, where it was  
376 hypothesized to be the center of origin for Genotype #1 *H. sinensis* under the geographic hypothesis of  
377 the genetic evolution of *H. sinensis* [57]. The GC-biased Genotype #7 sequence AJ488254 of *O. sinensis*  
378 was detected in the stroma of natural *C. sinensis* specimen #H1023 collected from Qinghai Province of  
379 China, without the coexistence of Genotype #1 *H. sinensis*. Interestingly, Genotype #1 *H. sinensis*  
380 sequence AJ488255 but not Genotype #7 was detected in the caterpillar body of the same *C. sinensis*  
381 specimen [60]. The sequences of Genotypes #8–12 of *O. sinensis* were uploaded directly to GenBank by  
382 Indian scientists with limited information disclosed [7–10].

383 A Bayesian phylogenetic analysis (*cf.* Fig 7) demonstrated that the AT-biased genotypes were  
384 clustered into 2 branches, Clusters A and B. AT-biased genotypes from both branches were detected in  
385 the stroma and SFP of *C. sinensis*, but Genotypes #4 and #15 of Cluster-B were absent in the ascospores,  
386 consistent with those discovered by Li et al. [61]. Genotype #4 of AT-biased Cluster-B was the dominant  
387 AT-biased genotype in the immature stroma at the asexual growth stage and coexisted with less dominant  
388 Genotypes #5–6 of AT-biased Cluster-A [16–17]. The abundance of Genotype #4 of Cluster-B markedly  
389 decreased in the mature *C. sinensis* stroma and remained at a low level in the SFP (with ascocarps) at the  
390 sexual growth stage. In contrast, the abundance of Genotype #5 of AT-biased Cluster-A increased

391 reciprocally and significantly in the mature *C. sinensis* stroma and SFP and predominated in the *O. sinensis*  
392 ascospores [16–17,69]. In addition, Genotype #15 of Cluster-B predominated in the SFP (with ascocarps)  
393 of *C. sinensis* prior to ascospore ejection and drastically declined after ejection [69]. The differential  
394 cooccurrence and alternative predominance of GC- and AT-biased genotypes of *O. sinensis* indicate their  
395 distinct physiological functions at different maturational stages of the *C. sinensis* lifecycle and their  
396 genomic independence belonging to independent *O. sinensis* fungi.

397 Engh [32], Kinjo & Zang [34], Wei et al. [50] and Mao et al. [59] reported the detection of either  
398 Genotype #4 or #5 of *O. sinensis*, without codetection of GC-biased Genotype #1 *O. sinensis*, in some  
399 natural *C. sinensis* specimens collected from geographically distant areas and in cultivated *C. sinensis*.  
400 These findings likely indicate that the studied specimens might be at different maturational stages and that  
401 the amplicons of other cocolonized *O. sinensis* genotypes and fungal species might be overlooked during  
402 PCR amplification and sequencing due to lower-abundance amplicons caused by the experimental designs  
403 without using genotype- and species-specific primers or cloning-based amplicon sequencing strategies.

404 In this study, we detected several AT-biased genotypes of Cluster-A and GC-biased Genotypes #1 *H.*  
405 *sinensis* and #13–14 in ascospores that cooccurred with *S. hepiali* and the AB067719-type fungus in the  
406 teleomorphic ascospores of natural *C. sinensis*. However, AT-biased Cluster-B genotypes were absent in  
407 ascospores but present in the SFP (with ascocarps). *Pseudogymnoascus roseus*, *Geomyces pannorum*,  
408 *Tolypocladium sinensis*, and *Penicillium chrysogenum* were not detected in the SFP (with ascocarps) and  
409 ascospores of *C. sinensis*, despite their differential predominance in the stroma and caterpillar body of  
410 natural *C. sinensis* found in 2 previous mycobiota studies [40–41].

411 The sequences of Genotypes #2–17 of *O. sinensis*, however, were not present in the genome  
412 assemblies (ANOV00000000, JAAVMX000000000, LKHE00000000, LWBQ00000000 and  
413 NGJJ00000000) of 5 Genotype #1 *H. sinensis* strains, Co18, IOZ07, 1229, ZJB12195 and CC1406-203,  
414 and instead belonged to the genomes of independent *O. sinensis* fungi [7–12,27–28,30–31,51–56,69].  
415 These genomic independence findings support the hypotheses of independent *O. sinensis* fungi and an  
416 integrated microecosystem for natural *C. sinensis* [14,24]. During the complex lifecycle of natural *C.*  
417 *sinensis*, its metagenomic members appear to function mutually and symbiotically at different  
418 development-maturation stages in a dynamically alternating manner from the immature to the maturing  
419 and then the mature stages and from initial asexual growth to sexual growth and reproduction.

## 420 **Complex anamorph-teleomorph connection of *O. sinensis***

421 The anamorph-teleomorph connection of *O. sinensis* has been the subject of decades-long academic  
422 debate [7–12,29,62]. Wei et al. [44] hypothesized that *H. sinensis* is the sole anamorph of *O. sinensis*  
423 based on the aforementioned 3 sets of evidence, which satisfied the requirements of the first and second  
424 criteria of Koch's postulates but unfortunately not the third and fourth criteria, making the hypothesis



425 uncertain [7–12,29–31,56]. Although this hypothesis has been widely appreciated, Wei et al. [44]  
426 demonstrated significant genetic diversity of *O. sinensis* teleomorphs (*cf.* the far phylogenetic distance  
427 with a low bootstrap value between natural *C. sinensis* specimens G3 and S4, shown in Fig 6 of [44]).

428 Bushley et al. [76] discovered the multicellular heterokaryotic structure of the hyphae and ascospores  
429 of *C. sinensis*, which contain multiple mono-, bi- and tri-nucleated cells. Li et al. [61], who are the research  
430 partners in the study [76], reported the identification of both GC-biased Genotype #1 and AT-biased  
431 Genotype #5 in 8 of 15 clones derived from the 25-day culture of a *C. sinensis* mono-ascospore. Based on  
432 insufficient and contradictory evidence, these researchers overinterpreted that all AT-biased genotypes  
433 were “ITS pseudogene” components of the genome of Genotype #1 *H. sinensis*, in agreement with the  
434 sole anamorph hypothesis for *H. sinensis* [44]. However, AT-biased genotype sequences are not present  
435 in the 5 whole-genome assemblies (ANOV0000000, JAAVMX0000000000, LKHE00000000, LWBQ00000000  
436 and NGJJ00000000) of Genotype #1 *H. sinensis* strains Co18, IOZ07, 1229, ZJB12195  
437 and CC1406-203 [7–10,31,51–55]. The genomic independence evidence disproved the “ITS pseudogene”  
438 hypothesis for the AT-biased genotypes of *O. sinensis* proposed by Li et al. [61].

439 In contrast, Barseghyan et al. [74] proposed a dual-anamorph hypothesis for *O. sinensis* involving  
440 *Tolypocladium sinensis* and *H. sinensis* using macro- and micromycological approaches, which leaves an  
441 unresolved question regarding the genotype of *O. sinensis* with *H. sinensis*-like morphological and growth  
442 characteristics. Engh [32] hypothesized that *C. sinensis* and *T. sinensis* form a fungal complex in the  
443 natural insect-fungal complex, and the *C. sinensis* sequence AJ786590 was disclosed and uploaded to the  
444 GenBank database by Stensrud et al. [65]. Stensrud et al. [66] clustered AJ786590 and other sequences  
445 into Group-B of *O. sinensis* using a Bayesian phylogenetic approach and concluded that Group-B  
446 sequences are phylogenetically distinct from GC-biased Group-A of *O. sinensis* (Genotype #1 *H.*  
447 *sinensis*).

448 Kinjo & Zang [34], Engh [32], Wei et al. [50] and Mao et al. [59] detected AT-biased Genotype #4  
449 or #5 of *O. sinensis* from natural *C. sinensis* specimens collected from different geographic regions or  
450 from cultivated *C. sinensis*. Zhang et al. [57] and Cheng et al. [58] reported the detection of GC-biased  
451 Genotype #3 of *O. sinensis* in natural *C. sinensis* collected from Nyingchi in Tibet. Chen et al. [60]  
452 reported the detection of GC-biased Genotype #7 of *O. sinensis* from the stroma of *C. sinensis* specimens  
453 collected from Qinghai Province of China. These mutant genotypes of *O. sinensis* share the same *H.*  
454 *sinensis*-like morphological and growth characteristics without the cooccurrence of Genotype #1 *H.*  
455 *sinensis*, although they may share a common evolutionary ancestor [32,34,57–60,66]. In the current study,  
456 we detected AT-biased Cluster-A genotypes (*cf.* Fig 7) and GC-biased Genotypes #1 and #13–14 in the  
457 teleomorphic ascospores of *C. sinensis*, along with *S. hepiali* and the AB067719-type fungus, and  
458 additional AT-biased Cluster-B genotypes in the stroma and SFP (with ascocarps) of *C. sinensis*.

459 Li et al. [43] recently reported the differential occurrence and transcription of the mating-type genes



460 of the *MAT1-1* and *MAT1-2* idiomorphs in 237 *H. sinensis* strains, indicating genetic and transcriptional  
461 inability to perform self-fertilization under homothallic or pseudohomothallic reproduction, as proposed  
462 by Hu et al. [51] and Bushley et al. [76]. Although Bushley et al. [76] reported the transcription of both  
463 the *MAT1-1-1* and *MAT1-2-1* genes of the *MAT1-1* and *MAT1-2* idiomorphs, the *MAT1-2-1* transcript  
464 of *H. sinensis* strain 1229 harbored unspliced intron I, which contains 3 stop codons. This type of transcript  
465 presumably produces a truncated and dysfunctional *MAT1-2-1* protein missing the majority portion of the  
466 protein encoded by exons II and III [43,78]. These findings constitute a coupled transcriptional-  
467 translational mechanism of *H. sinensis* reproductive control, in addition to the controls at the genetic and  
468 transcriptional levels. The differential occurrence and transcription of the mating genes of the *MAT1-1*  
469 and *MAT1-2* idiomorphs indicate that *H. sinensis* needs a sexual partner to perform physiologically  
470 heterothallic reproduction in the lifecycle of natural *C. sinensis*, regardless of whether *H. sinensis* is  
471 monoecious or dioecious [43,78]. For instance, *H. sinensis* strains 1229 and L0106 appear to reciprocally  
472 produce functional *MAT1-1-1* and *MAT1-2-1* transcripts and presumably complementary mating proteins  
473 [76,79], possibly constituting a pair of sexual partners for physiological heterothallism [43,78]. In  
474 addition, the transcripts of mating-type genes in *S. hepiali* strain Feng [80] were coincidentally found to  
475 be complementary to those of *H. sinensis* strain L0106 [79]. The coincident transcriptomic findings reveal  
476 a possible transcriptomic mechanism for fungal hybridization, which triggers further investigation because  
477 *H. sinensis* is closely associated with a small quantity of *S. hepiali* in the compartments of natural *C.*  
478 *sinensis*, often resulting in difficulties in fungal isolation and purification even by top-notch mycology  
479 taxonomists [77].

480 Wei et al. [50] reported an industrial artificial cultivation project in which 3 anamorphic *H. sinensis*  
481 strains, 130508-KD-2B, 20110514 and H01-20140924-03, were reportedly used as inoculants. The  
482 successful cultivation of *C. sinensis* is important for supplementing the increasingly scarce natural  
483 resources of *C. sinensis* and for meeting the third criterion of Koch's postulates, adding academic value  
484 on top of the aforementioned 3 sets of evidence [44]. However, these authors reported the identification  
485 of the sole teleomorph of *O. sinensis* in the fruiting body of cultivated *C. sinensis*, which belonged to AT-  
486 biased Genotype #4. Thus, the apparent fungal mismatch between the inoculants used in artificial  
487 cultivation and the final cultivated product resulted in failure to meet the requirement of the fourth criterion  
488 of Koch's postulates. In addition to the detection of teleomorphic AT-biased Genotype #4 in cultivated *C.*  
489 *sinensis*, Wei et al. [50] also reported the detection of teleomorphic GC-biased Genotype #1 in natural *C.*  
490 *sinensis*. Because the sequence of AT-biased Genotype #4 is absent in the 5 whole-genome assemblies  
491 (ANOV00000000, JAAVMX00000000, LKHE00000000, LWBQ00000000 and NGJJ00000000) of the  
492 GC-biased Genotype #1 *H. sinensis* strains Co18, IOZ07, 1229, ZJB12195 and CC1406-203 [51–55], the  
493 scientific evidence reported by Wei et al. [50] disproves the sole anamorph and sole teleomorph  
494 hypotheses for *O. sinensis*, which were proposed 10 years ago by the same group of key authors [44]. The  
495 species mismatch reported by Wei et al. [50] may imply (1) that the researchers could have overlooked

496 the Genotype #4 sequence in one or all of the anamorphic inoculant strains, which would confirm previous  
497 findings that GC-biased Genotype #1 *H. sinensis* (Group-A) and AT-biased genotypes (Groups B and C)  
498 formed a species complex [66] and that the actual causative agent is a fungal (species) complex containing  
499 several *O. sinensis* genotypes and *S. hepiali* [77]; or (2) that secondary or sequential infections by the true  
500 causal fungus/fungi (Genotype #4 and possibly other genotypes of *O. sinensis*) occurred in the course of  
501 artificial cultivation. A third possibility is that a series of preprogrammed, nonrandom mutagenic  
502 conversions of GC-biased Genotype #1 to AT-biased Genotype #4 occurred during artificial cultivation  
503 without exception in all cultivated *C. sinensis* products (and *vice versa* after the ejection of the ascospores);  
504 however, this possibility seems the least likely.

505 Zhang et al. [81] summarized nearly 40 years of artificial cultivation experience with failed induction  
506 of fruiting body and ascospore production in research-oriented academic settings, either in fungal cultures  
507 or after infecting insects with fungal inoculants. Distinct from the success of artificial *C. sinensis*  
508 cultivation in product-oriented industrial settings, as reported by Wei et al. [50], Hu et al. [51] inoculated  
509 40 larvae of *Hepialus* sp. with 2 pure *H. sinensis* strains (Co18 and QH195-2) *via* the injection of a  
510 mycelial mixture through the second larval proleg, which caused death and mummification of the larvae  
511 but failed to induce the production of a fruiting body. Li et al. [77] inoculated 400 larvae of *Hepialus*  
512 *armoricanus* with 4 groups of inoculants (n=100 larvae per inoculant): (1) conidia of *H. sinensis*, (2)  
513 mycelia of *H. sinensis*, (3) purified ascospores of *C. sinensis*, and (4) a mixture of 2 wild-type fungal  
514 strains, CH1 and CH2, isolated from the intestines of healthy living larvae of *Hepialus lagii* Yan [82].  
515 Both strains CH1 and CH2 showed *H. sinensis*-like morphological and growth characteristics and  
516 contained GC-biased Genotype #1 *H. sinensis* and *S. hepiali* as well as highly abundant AT-biased  
517 Genotype #5 of *O. sinensis* and the markedly less abundant Genotypes #4 and #6 [77]. The application of  
518 a mycelial mixture of strains CH1 and CH2 as the inoculant resulted in a favorable infection-mortality-  
519 mummification rate of 55.2±4.4%, indicating 15–39-fold greater potency than the infection-mortality-  
520 mummification rates (1.4–3.5%; P<0.001) achieved after inoculation with the conidia or mycelia of *H.*  
521 *sinensis* or ascospores of *C. sinensis*. These findings reported by Li et al. [43,77], Wei et al. [50], Hu et al.  
522 [51], and Zhang et al. [81] suggest that GC-biased Genotype #1 *H. sinensis* may not be the sole true  
523 causative fungus in natural *C. sinensis* and that inoculation synergy of the symbiotic fungal species may  
524 be needed to initiate the development of the stromal primordia and fruiting bodies, and sexual partners  
525 regardless of whether they are the same or interspecific species may be needed to induce the transition of  
526 asexual to sexual growth and reproduction and the maturation of the teleomorphic ascocarps and  
527 ascospores during the lifecycle of natural and cultivated *C. sinensis*.

528 The microcycle conidiation of *C. sinensis* ascospores using culture protocols favoring the growth of  
529 *H. sinensis* has also been reported [45–47]. Bushley et al. [76] demonstrated that *C. sinensis* ascospores  
530 are multicellular heterokaryotic, consisting of multiple mono-, bi- and tri-karyotic cells. Our study herein

531 demonstrated that the fully ejected *C. sinensis* ascospores contain GC-biased Genotypes #1 and #14, AT-  
532 biased Genotypes #5–6 and #16 within AT-biased Cluster-A, *S. hepiali* and the AB067719-type fungus  
533 (*cf.* Table 2 and Fig 7). These findings suggest a multicellular heterokaryotic structure and genetic  
534 heterogeneity of ascospores [7–10]. However, the culture-dependent approach detected only GC-biased  
535 Genotype #1 and AT-biased Genotype #5 after a 25-day liquid fermentation of a mono-ascospore [61],  
536 suggesting the possibility of overlooking several AT-biased genotypes and GC-biased Genotypes #14,  
537 probably due to nonculturability of those genotypes or inappropriately designed and used molecular  
538 techniques. The nonculturable nature of most genotypes of *O. sinensis* fungi examined to date [62–64]  
539 calls into question whether all genotypes of *O. sinensis* in all cells of multicellular heterokaryotic  
540 ascospores are capable of undergoing conidiation through *in vitro* microcycle conidiation under the  
541 commonly used experimental conditions that favor the growth of Genotype #1 *H. sinensis*. The lack of  
542 molecular information on conidia in these studies [45–47] makes the fungal/genotypic identity of the  
543 conidia uncertain due to the *H. sinensis*-like morphological and growth characteristics shared by multiple  
544 genotypes of *O. sinensis* [32,34,50,57–61,76–77] and the *Hirsutella*-like morphology shared by numerous  
545 fungal species in the families Ophiocordycipitaceae and Clavicipitaceae and the genera *Polycephalomyces*  
546 and *Harposporium* [83].

547 The study described herein further revealed fungal and genotypic heterogeneity in the multicellular  
548 heterokaryotic ascospores of *C. sinensis*. AT-biased Cluster-A genotypes, GC-biased Genotype #1 *H.*  
549 *sinensis* and Genotype #13 or #14 (showing large DNA segment reciprocal substitutions and genetic  
550 material recombination) in either type of ascospores, *S. hepiali* and the AB067719-type Group-E fungus  
551 naturally cooccur in teleomorphic *C. sinensis* ascospores.

## 552 **Genotypes #4 and #15 of AT-biased Cluster-B play special roles in the early** 553 **development of stroma and SFP (with ascocarps)**

554 Studies of natural and cultivated *C. sinensis* have detected Genotype #4 of *O. sinensis* but not  
555 coexisting GC- and AT-biased genotypes of *O. sinensis*, including AJ786590 discovered by Engh [32]  
556 and uploaded to GenBank by Stensrud et al. [65], AB067741–AB067749 identified by Kinjo & Zang [34],  
557 KC305891–KC305892 discovered by Mao et al. [59], and 2 sequences (“Fruiting body 3” and “Mycelia  
558 3”, sequences unavailable in GenBank) with high homology to AB067749 and KC305892 found by Wei  
559 et al. [50]. These studies did not report the maturation stages of natural and cultivated *C. sinensis*  
560 specimens that were used as the study materials. However, other studies using genotype-specific primers,  
561 amplicon cloning and biochip-based SNP mass spectrometry genotyping techniques reported the detection  
562 of Genotype #4 of *O. sinensis* in natural *C. sinensis* coexisting with Genotype #1 *H. sinensis* with or  
563 without Genotypes #5–6 [16–18,23–24,27–28,30–31,56,61,69,77].

564 Genotype #4 of AT-biased Cluster-B was found to predominate in the stroma of immature *C. sinensis*  
565 and to decline during *C. sinensis* maturation [16–17,27–28,30–31,56,69]. Genotype #4 and the newly  
566 discovered Genotype #15 of AT-biased Cluster-B are present in the SFP (with ascocarps) but not in  
567 ascospores of natural *C. sinensis* (*cf.* Table 2) [69].

## 568 **Fungal factors involved in the control of the development, maturation and** 569 **ejection of *C. sinensis* ascospores**

570 AT-biased Cluster-B Genotypes #4 and #15 were not present in ascospores of *O. sinensis*. In addition  
571 to the minimal quantity of Genotype #4 in the SFP (with ascocarps), Genotype #15 was predominant in  
572 the SFP prior to ascospore ejection but drastically declined in abundance after ascospore ejection [69].  
573 The dynamic alterations indicate that Genotype #15 may play a symbiotic role in constructing ascocarp  
574 scaffolds and participating in the development, maturation and ejection of ascospores.

575 In this study, we report the discovery of 2 types of ascospores of *C. sinensis*, namely, fully and semi-  
576 ejected ascospores. In contrast to the well-described fully ejected ascospores, semi-ejected ascospores  
577 show tight adhesion to the outer surface of asci, hanging out of the perithecial opening (*cf.* Figs 1, 4). The  
578 distinct ejection behaviors of ascospores are associated with divergent fungal compositions. In addition to  
579 the cooccurrence of GC-biased Genotype #1, AT-biased Cluster-A genotypes and the AB067719-type  
580 fungus in the 2 types of ascospores, the semi-ejected ascospores contain Genotype #13 of *O. sinensis* and  
581 a greater abundance of *S. hepiali*, whereas the fully ejected ascospores contain Genotype #14 and a  
582 markedly lower abundance of *S. hepiali* (*cf.* Fig 5 and Table 2). Genotypes #13–14 show alternating  
583 reciprocal substitutions of large DNA segments between the genomes of 2 parental fungi, namely,  
584 Genotype #1 *H. sinensis* (Group-A by [66]) and the AB067719-type Group-E fungus (*cf.* Table 3 and Fig  
585 6), indicating that the biological processes of plasmogamy, karyogamy, chromosomal intertwining  
586 interaction, and genetic material recombination occur differentially between the 2 parental fungi,  
587 regardless of the process of hereditary variation caused by fungal hybridization or parasexual reproduction  
588 [9,43]. The divergent fungal components with altered abundances may participate in the control of the  
589 development, maturation and ejection of *C. sinensis* ascospores.

590 Genotypes #6 and #16 of AT-biased Cluster-A were detected in fully ejected ascospores but not in  
591 semi-ejected ascospores using genotype-specific primers and cloning-based amplicon sequencing (*cf.*  
592 Tables 2; Fig 7). The differential occurrence of these 2 AT-biased genotypes may need to be further  
593 verified due to the possible existence of secondary structures/conformation in the DNA sequences, which  
594 may affect primer binding and DNA chain elongation during PCR amplification and sequencing [7–10].  
595 In fact, Genotypes #6 and #16 were detected in both types of ascospores using the MassARRAY SNP  
596 mass spectrometry technique [69]. In contrast to the more than doubled increase in the abundance of

597 Genotype #5 after ascospore ejection, the abundance of Genotypes #6 and #16 increased moderately,  
598 resulting in an increase in the intensity ratio of peak C (representing Genotype #5) and peak T  
599 (representing Genotypes #6 and #16) [69]. The dynamic alterations of the AT-biased genotypes may  
600 indicate their different phylogenetic and symbiotic roles in the development, maturation and ejection of  
601 *C. sinensis* ascospores.

## 602 Conclusions

603 This study identified 2 types of multicellular heterokaryotic ascospores collected from the same  
604 natural *C. sinensis* specimens. Multiple genotypes of *O. sinensis* coexist differentially in the 2 types of *C.*  
605 *sinensis* ascospores and are accompanied by *S. hepiali* and the AB067719-type fungus. The divergent  
606 fungal components of the 2 types of ascospores may participate in the control of the development,  
607 maturation and ejection of the ascospores. The AT-biased Cluster-A genotypes are present in the stroma,  
608 SFP (with ascocarps), and ascospores; however, the AT-biased Cluster-B genotypes are present in the  
609 stroma and SFP but not in ascospores. Multiple fungal components occur differentially in the  
610 compartments of natural *C. sinensis* and undergo dynamic alterations in an asynchronous, disproportional  
611 manner during *C. sinensis* maturation. These findings describe part of the complex lifecycle of this  
612 precious TCM therapeutic agent, whose metagenomic components undergo dynamic alterations at  
613 different development and maturation stages in a symbiotic manner.

## 614 Acknowledgments

615 This research was supported by a grant from the Science and Technology Department of Qinghai  
616 Province, China, grant number 2021-SF-A4 “Study on key technologies of conservation of natural  
617 resource and industrial upgrading of *Cordyceps sinensis*”, the major science and technology projects in  
618 Qinghai Province.

619 The authors are grateful to Prof. Mu Zang, Prof. Ru-Qin Dai, Prof. Ying-Lan Guo, Prof. Ping Zhu,  
620 Prof. Zong-Qi Liang, Prof. Zhao-Lan Li, Prof. Yu-Guo Zheng, Dr. Jia-Gang Zhao and Dr. Yan-Jiao Zhou,  
621 for consultations, and Prof. Xin Liu, Prof. Hai-Feng Xu, Ms. Xiao-Li Ma, Ms. Ming Yang, Mr. Zong-Hao  
622 Zhang, Mr. Wei Chen, Mr. Tao-Ye Zheng, Mr. Jin-Jin Li, and Mr. Yu-Chun Zhou for their assistance.

## 623 [REFERENCES]

- 624 [1] Song L-R, Hong X, Ding X-L, Zang Z-Y. *Monographs of Modern Pharmacy of Chinese Traditional Medicine*.  
625 People’s Health Publishing House, Beijing 2001. pp. 733–737.
- 626 [2] Zhu J-S, Halpern GM, Jones K. The scientific rediscovery of a precious ancient Chinese herbal regimen:  
627 *Cordyceps sinensis*: Part I. *J. Altern. Complem. Med.* 1998a;4(3):289–303.
- 628 [3] Zhu J-S, Halpern GM, Jones K. The scientific rediscovery of an ancient Chinese herbal medicine: *Cordyceps*  
629 *sinensis*: Part II. *J. Altern. Complem. Med.* 1998b;4(4):429–457.
- 630 [4] Lo H-C, Hsieh C, Lin F-Y, Hsu T-H. A Systematic Review of the Mysterious Caterpillar Fungus



- 631 *Ophiocordyceps sinensis* in Dōng Chóng Xià Cǎo and Related Bioactive Ingredients. J. Tradit. Compliment  
632 Med. 2013;3(1):16-32.
- 633 [5] Li C-L, Tan N-Z, Berger JL, Ferguson SB, Zhang Y, Prolla TA, et al. The Combined use of ageLOC whole-gene  
634 expression profiling technology and mouse lifespan test in anti-aging herbal product study. Proc. 2011 New  
635 TCM Prod. Innovat. Indust. Devel. Summit, Hangzhou, China, 2011, pp. 443–448
- 636 [6] Tan N-Z, Berger JL, Zhang Y, Prolla TA, Weindruch R, Zhao C-S, et al. The lifespan-prolonging effect of  
637 *Cordyceps sinensis* Cs-4 in normal mice and its molecular mechanisms. FASEB J. 2011;25(1):599.1
- 638 [7] Zhu J-S, Wu J-Y. Genetic heterogeneity of natural *Cordyceps sinensis* with co-existence of multiple fungi. Chin.  
639 J. Cell Biol. 2015;37(2):284–298.
- 640 [8] Zhu J-S, Li Y-L. A Precious Transitional Chinese Medicine, *Cordyceps sinensis*: Multiple heterogeneous  
641 *Ophiocordyceps sinensis* in the insect-fungi complex. Lambert Academic Publishing, Saarbrücken. Germany  
642 2017.
- 643 [9] Li Y-L, Li X-Z, Zhu J-S. *Cordyceps sinensis* Fungal Heterokaryons. Chemistry Industry Press Co., Beijing,  
644 China, 2022.
- 645 [10] Li Y-L, Yao Y-S, Xie W-D, Zhu J-S. Molecular heterogeneity of natural *Cordyceps sinensis* with multiple  
646 *Ophiocordyceps sinensis* fungi challenges the anamorph-teleomorph connection hypotheses and implementation  
647 of the Amsterdam Declaration of IMA. Am. J. Biomed. Sci. 2016;8(2):123–159.
- 648 [11] Yao Y-S, Zhu J-S. Indiscriminative use of the Latin name for natural *Cordyceps sinensis* insect-fungi complex  
649 and multiple *Ophiocordyceps sinensis* fungi. Chin. J. Chin. Mater Med. 2016;41(7):1361–1366.
- 650 [12] Li Y-L, Li X-Z, Yao Y-S, Xie W-D, Zhu J-S. Molecular identification of *Ophiocordyceps sinensis* genotypes  
651 and the indiscriminate use of the Latin name for the multiple genotypes and the natural insect-fungi complex.  
652 Am J BioMed Sci. 2022;14(3): (in press).
- 653 [13] Xu J-T. Chinese Medicinal Mycology. Beijing Med. Univ. Press and China Peking Union Med. Univ. Press,  
654 Beijing, 1997, pp. 354–385.
- 655 [14] Liang Z-Q, Han Y-F, Liang J-D, Dong X, Du W. Issues of concern in the studies of *Ophiocordyceps sinensis*.  
656 Microbiol. Chin. 2010;37(11):1692–1697.
- 657 [15] Zhang W-W, Cheng X-L, Liu X-Z, Xiang M-C. Genome Studies on Nematophagous and Entomogenous Fungi  
658 in China. J Fungi. 2016;2:9. [doi:10.3390/jof2010009](https://doi.org/10.3390/jof2010009)
- 659 [16] Gao L, Li X-H, Zhao J-Q, Lu J-H, Zhu J-S. Detection of multiple *Ophiocordyceps sinensis* mutants in premature  
660 stroma of *Cordyceps sinensis* by MassARRAY SNP MALDI-TOF mass spectrum genotyping. J. Peking Univ.  
661 (Health Sci.). 2011;43(2):259–266.
- 662 [17] Gao L, Li X-H, Zhao J-Q, Lu J-H, Zhao J-G, Zhu J-S. Maturation of *Cordyceps sinensis* associates with  
663 alterations of fungal expressions of multiple *Ophiocordyceps sinensis* mutants with transition and transversion  
664 point mutations in stroma of *Cordyceps sinensis*. J. Peking Univ. (Health Sci.). 2012;44(3):454–463.
- 665 [18] Yao Y-S, Zhou Y-J, Gao L, Lu J-H, Zhu J-S. Dynamic alterations of the differential fungal expressions of  
666 *Ophiocordyceps sinensis* and its mutant genotypes in stroma and caterpillar during maturation of natural  
667 *Cordyceps sinensis*. J. Fungal Res. 2011;9(1):37–49,53.
- 668 [19] Yao Y-S, Gao L, Li Y-L, Ma S-L, Wu Z-M, Tan N-Z, et al. Amplicon density-weighted algorithms analyze  
669 dissimilarity and dynamic alterations of RAPD polymorphisms in the integrated micro-ecosystem *Cordyceps*  
670 *sinensis*. J. Peking Univ. (Health Sci.). 2014;46(4):618–628.
- 671 [20] Dong Y-Z, Zhang L-J, Wu Z-M, Gao L, Yao Y-S, Tan N-Z, et al. Altered proteomic polymorphisms in the  
672 caterpillar body and stroma of natural *Cordyceps sinensis* during maturation. PLoS ONE. 2014;9(10):e109083.  
673 [doi: 10.1371/journal.pone.0109083](https://doi.org/10.1371/journal.pone.0109083)
- 674 [21] Ni L-Q, Yao Y-S, Gao L, Wu Z-M, Tan N-Z, Wu J-Y, et al. Density-weighted algorithms for similarity  
675 computation and cluster tree construction in the RAPD analysis of a micro-ecosystem *Cordyceps sinensis*. Am.  
676 J. Biomed. Sci. 2014;6(2):82–104.
- 677 [22] Liu Y-N, Jin Y-S, Liu Z, Han Y-N. *Cordyceps sinensis* cDNA library construction and identification. Chin. J.  
678 Informat. TCM 2006;13(9):43–45.
- 679 [23] Yang J-L, Xiao W, He H-H, Zhu H-X, Wang S-F, Cheng K-D, et al. Molecular phylogenetic analysis of



- 680 *Paecilomyces hepiali* and *Cordyceps sinensis*. Acta Pharmaceut. Sinica. 2008;43(4):421–426.
- 681 [24] Xiao W, Yang J-P, Zhu P, Cheng K-D, He H-X, Zhu H-X, et al. Non-support of species complex hypothesis of  
682 *Cordyceps sinensis* by targeted rDNA-ITS sequence analysis. Mycosystema. 2009;28(6):724–730.
- 683 [25] Xiao Y-Y, Cao Y-M, Zhang L, Li C-R. Study on Genetic Diversity of Anamorphic Isolates from Different  
684 Sources of *Ophiocordyceps sinensis* by ISSR. J. Fungal Res. 2014;12(3):154–159.
- 685 [26] Zhu J-S, Guo Y-L, Yao Y-S, Zhou Y-J, Lu J-H, Qi Y, et al. Maturation of *Cordyceps sinensis* associates with  
686 co-existence of *Hirsutella sinensis* and *Paecilomyces hepiali* DNA and dynamic changes in fungal competitive  
687 proliferation predominance and chemical profiles. J. Fungal Res. 2007;5(4):214–224.
- 688 [27] Zhu J-S, Gao L, Li X-H, Yao Y-S, Zhou Y-J, Zhao J-Q, et al. Maturation alterations of oppositely orientated  
689 rDNA and differential proliferations of CG:AT-biased genotypes of *Cordyceps sinensis* fungi and *Paecilomyces*  
690 *hepiali* in natural *C. sinensis*. Am. J. Biomed. Sci. 2010;2(3):217–238.
- 691 [28] Zhu J-S, Zhao J-G, Gao L, Li X-H, Zhao J-Q, Lu J-H. Dynamically altered expressions of at least 6  
692 *Ophiocordyceps sinensis* mutants in the stroma of *Cordyceps sinensis*. J. Fungal Res. 2012;10(2):100–112.
- 693 [29] Jiang Y, Yao Y-J. A review for the debating studies on the anamorph of *Cordyceps sinensis*. Mycosistema.  
694 2003;22(1):161–176.
- 695 [30] Zhu J-S, Li Y-L, Yao Y-S, Xie W-D. Molecular evidence not supporting the use of *Hirsutella sinensis* strain  
696 EFCC7287 as the taxonomic standard for multiple *Ophiocordyceps sinensis* fungi. Intl. J. Mol. Biol.  
697 2018;3:114–115.
- 698 [31] Zhu J-S, Li Y-L, Yao Y-S, Xie W-D. The multiple genotypes of *Ophiocordyceps sinensis* and the “ITS  
699 pseudogene” hypothesis. Mol. Phylogenet Evol. 2019;139:106322. doi: [10.1016/j.ympev.2018.10.034](https://doi.org/10.1016/j.ympev.2018.10.034)
- 700 [32] Engh IB. Molecular phylogeny of the *Cordyceps-Tolypocladium* complex. Candidate scientific thesis,  
701 Department of Biology, University of Oslo, 1999.
- 702 [33] Zhao J, Wang N, Chen Y-Q, Li T-H, Qu L-H. Molecular identification for the asexual stage of *Cordyceps*  
703 *sinensis*. Acta Sci. Nat. Univ. Sunyatseni. 1999;38(1):122–123.
- 704 [34] Kinjo N, Zang M. Morphological and phylogenetic studies on *Cordyceps sinensis* distributed in southwestern  
705 China. Mycoscience. 2001;42:567–574.
- 706 [35] Chen Y-Q, Wang N, Li T-H, Zhang W-M. Determination of the anamorph of *Cordyceps sinensis* inferred from  
707 the analysis of the ribosomal DNA internal transcribed spacers and 5.8S rDNA. Biochem. Syst. Ecol.  
708 2001;29:597–607.
- 709 [36] Chen Y-Q, Hu B, Xu F, Zhang W-M, Zhou H, Qu L-H. Genetic variation of *Cordyceps sinensis*, a fruit-body-  
710 producing entomopathogenic species from different geographical regions in China. FEMS Microbiol. Lett.  
711 2004;230:153–158.
- 712 [37] Liu Z-Y, Yao Y-J, Liang Z-Q, Liu A-Y, Pegler DN, Chase M-W. Molecular evidence for the anamorph-  
713 teleomorph connection in *Cordyceps sinensis*. Mycol. Res. 2001;105(7):827–832.
- 714 [38] He S-Q, Jin X-L, Luo J-C, Wang C-M, Wang S-R. Morphological characteristics and submerged culture  
715 medium screening of a strain of *Geomyces pannorum* isolation from *Cordyceps sinensis*. Chin. J. Grassland.  
716 2010;32(z1):70–75.
- 717 [39] He S-Q, Jin X-L, Luo J-C, Wang C-M. Morphological characteristics and submerged culture medium screening  
718 of *Pseudogymnoascus roseus*. Microbiol. Chin. 2011;38(9):1371–1376.
- 719 [40] Zhang Y-J, Sun B-D, Zhang S, Wangmü, Liu X-Z, Gong W-F. Mycobiotal investigation of natural  
720 *Ophiocordyceps sinensis* based on culture-dependent investigation. Mycosistema. 2010;29(4):518–527.
- 721 [41] Xia F, Liu Y, Shen G-L, Guo L-X, Zhou X-W. Investigation and analysis of microbiological communities in  
722 natural *Ophiocordyceps sinensis*. Can. J. Microbiol. 2015;61:104–111.
- 723 [42] Yang J-Y, Tong X-X, He C-Y, Bai J, Wang F, Guo J-L. Comparison of endogenetic microbial community  
724 diversity between wild *Cordyceps sinensis*, artificial *C. sinensis* and habitat soil. Chin. J. Chin. Materia Medica.  
725 2021;46(12):3106–3115.
- 726 [43] Li X-Z, Li Y-L, Zhu J-S. Differential expression of mating-type genes in *Hirsutella sinensis* and natural  
727 *Cordyceps sinensis*. Proc. 2021 Intl. Conf. Info. Technol. Biomed. Engineering, 2021, pp. 318–333.  
728 <https://conferences.computer.org/icitbepub/pdfs/ICITBE2021->

- 729 [6JNtJiThlp10s9N5Sodvuy/009900a318/009900a318.pdf](https://doi.org/10.1101/2022.06.20.496766)
- 730 [44] Wei X-L, Yin X-C, Guo Y-L, Shen N-Y, Wei, J.-C. Analyses of molecular systematics on *Cordyceps sinensis*  
731 and its related taxa. *Mycosystema*. 2006;25(2):192–202.
- 732 [45] Mo M-H, Chi S-Q, Zhang K-Q. Microcycle conidiation of *Cordyceps sinensis* and anamorph isolation.  
733 *Mycosystema*. (2001;20:482–485.
- 734 [46] Liu Z-Y, Liang Z-Q, Liu A-Y. Investigation on microcycle conidiation of ascospores and conidiogenous  
735 structures of anamorph of *Cordyceps sinensis*. *Guizhou Agricult. Sci.* 2003;31(1):3–5.
- 736 [47] Xiao Y-Y, Chen C, Dong J-F, Li C-R, Fan M-Z. Morphological observation of ascospores of *Ophiocordyceps*  
737 *sinensis* and its anamorph in growth process. *J. Anhui Agricult. Univ.* 2011;38(4):587–591.
- 738 [48] Wang N, Chen Y-Q, Zhang W-M, Li T-H, Qu L-H. Molecular evidence indicating multiple origins in the  
739 entomogenous *Cordyceps*. *Acta Sci. Nat. Univ. Sunyatseni.* 2000;39:70–73.
- 740 [49] Li Z-Z, Huang B, Li C-R, Fan M-Z. Molecular evidence for anamorph determination of *Cordyceps sinensis*  
741 (Berk.) Sacc. *Mycosystema*. 2000;9(1):60–64.
- 742 [50] Wei J-C, Wei X-L, Zheng W-F, Guo W, Liu R-D. Species identification and component detection of  
743 *Ophiocordyceps sinensis* cultivated by modern industry. *Mycosystema*. 2016;35(4):404–410.
- 744 [51] Hu X, Zhang Y-J, Xiao G-H, Zheng P, Xia Y-L, Zhang X-Y, St Leger RJ, Liu X-Z, Wang C-S. Genome survey  
745 uncovers the secrets of sex and lifestyle in caterpillar fungus. *Chin. Sci. Bull.* 2013;58:2846–2854.
- 746 [52] Li Y, Hsiang T, Yang R-H, Hu X-D, Wang K, Wang W-J, et al. Comparison of different sequencing and  
747 assembly strategies for a repeat-rich fungal genome, *Ophiocordyceps sinensis*. *J. Microbiol. Methods*.  
748 2016;128:1–6.
- 749 [53] Liu J, Guo L-N, Li Z-W, Zhou Z, Li Z, Li Q, et al. Genomic analyses reveal evolutionary and geologic context  
750 for the plateau fungus *Ophiocordyceps sinensis*. *Clin. Med.* 2020;15:107–119.
- 751 [54] Jin L-Q, Xu Z-W, Zhang B, Yi M, Weng C-Y, Lin S, et al. Genome sequencing and analysis of fungus  
752 *Hirsutella sinensis* isolated from *Ophiocordyceps sinensis*. *AMB Expr.* 2020;10:105.  
753 <https://doi.org/10.1186/s13568-020-01039-x>
- 754 [55] Shu R-H, Zhang J-H, Meng Q, Zhang H, Zhou G-L, Li M-M, et al. A new high-quality draft genome assembly  
755 of the Chinese cordyceps *Ophiocordyceps sinensis*. *Genome Biol. Evol.* 2020;12(7):1074–1079.
- 756 [56] Li X-Z, Li Y-L, Yao Y-S, Xie W-D, Zhu J-S. Further discussion with Li et al. (2013, 2019) regarding the “ITS  
757 pseudogene hypothesis” for *Ophiocordyceps sinensis*. *Mol. Phylogenet. Evol.* 2020;146:106728.  
758 <https://doi.org/10.1016/j.ympev.2019.106728>
- 759 [57] Zhang Y-J, Xu L-L, Zhang S, Liu X-Z, An Z-Q, Wangmü, et al. Genetic diversity of *Ophiocordyceps sinensis*, a  
760 medicinal fungus endemic to the Tibetan Plateau: implications for its evolution and conservation. *BMC Evol.*  
761 *Biol.* 2009;9:290. [doi:10.1186/1471-2148-9-290](https://doi.org/10.1186/1471-2148-9-290)
- 762 [58] Cheng Q-Q, Cheng C-S, Ouyang Y, Lao C-C, Cui H, Xian Y, et al. Discovery of differential sequences for  
763 improving breeding and yield of cultivated *Ophiocordyceps sinensis* through ITS sequencing and phylogenetic  
764 analysis. *Chin. J. Nat. Med.* 2018;16(10):0749–0755.
- 765 [59] Mao X-M, Zhao S-M, Cao L, Yan X, Han R-C. The morphology observation of *Ophiocordyceps sinensis* from  
766 different origins. *J Environ. Entomol.* 2013;35(3):343–353.
- 767 [60] Chen C-S, Hseu R-S, Huang C-T. Quality control of *Cordyceps sinensis* teleomorph, anamorph, and Its  
768 products. Chapter 12, in (Shoyama, Y., Ed.) *Quality Control of Herbal Medicines and Related Areas*. InTech,  
769 Rijeka, Croatia, 2011. [www.intechopen.com](http://www.intechopen.com)
- 770 [61] Li Y, Jiao L, Yao Y-J. Non-concerted ITS evolution in fungi, as revealed from the important medicinal fungus  
771 *Ophiocordyceps sinensis*. *Mol. Phylogenet. Evol.* 2013;68:373–379.
- 772 [62] Liang Z-Q. Anamorphs of *Cordyceps* and their determination. *Southwest Chin. J. Agricult. Sci.* 1991;4(4):1–8.
- 773 [63] Tjedje JM, Asuming-Brempong S, Nüsslein K, Marsh TL, Flynn SJ. Opening the black box of soil microbial  
774 diversity. *Appl. Soil. Ecol.* 1999;13:109–122.
- 775 [64] Schmeisser C, Steele H, Streit W. Metagenomics , biotechnology with non-culturable microbes. *Appl.*  
776 *Microbiol. Biotechnol.* 2007;75:955–962.

- 777 [65] Stensrud Ø, Hywel-Jones NL, Schumacher T. Toward a phylogenetic classification of *Cordyceps*: ITS nrDNA  
778 sequence data confirm divergent lineages and paraphyly. *Mycol. Res.* 2005;109:41–56.
- 779 [66] Stensrud Ø, Schumacher T, Shalchian-Tabrizi K, Svegardenib IB, Kausserud H. Accelerated nrDNA evolution  
780 and profound AT bias in the medicinal fungus *Cordyceps sinensis*. *Mycol. Res.* 2007;111:409–415.
- 781 [67] Yang J-Y, Tong X-X, He C-Y, Bai J, Wang F, Guo J-L. Comparison of endogenetic microbial community  
782 diversity between wild *Cordyceps sinensis*, artificial *C. sinensis* and habitat soil. *Chin. J. Chin. Materia Medica.*  
783 2021;46(12):3106–3115.
- 784 [68] Li Y-L. Preliminary study on the ascospores of *Cordyceps sinensis*. *Edible Fungi Chin.* 2002;21(4):9–10.
- 785 [69] Li Y-L, Li X-Z, Yao Y-S, Wu Z-M, Lou Z-Q, Xie W-D, et al. Altered GC- and AT-biased genotypes of  
786 *Ophiocordyceps sinensis* in the stromal fertile portions and ascospores of natural *Cordyceps sinensis*. *PLOS*  
787 *ONE.* 2022. (Submitted as a companion paper)
- 788 [70] Lin W-C, Wu Y-W, Xie M-C, Zhu J-S. Reduced liver necrosis and fibrosis and improved liver functions in a  
789 CCl4-induced hepatitis model by ReishiMax supplementation. *Gastroenterol.* 2004;126(4II):A431.
- 790 [71] Wang Y-B, Wang Y, Fan Q, Duan D-E, Zhang G-D, Dai R-Q, et al. Multigene phylogeny of the family  
791 *Cordycipitaceae* (Hypocreales): new taxa and the new systematic position of the Chinese cordycipitoid fungus  
792 *Paecilomyces hepiali*. *Fungal Diversity.* 2020;103:1–46.
- 793 [72] Chen J, Zhang W, Lu T. Morphological and genetic characterization of a cultivated *Cordyceps sinensis* fungus  
794 and its polysaccharide component possessing antioxidant property in H22 tumor-bearing mice. *Life Sci.*  
795 2006;78(23):2742–2748.
- 796 [73] Leung P-H, Zhang Q-X, Wu J-Y. Mycelium cultivation, chemical composition and antitumour activity of a  
797 *Tolyocladium* sp. fungus isolated from wild *Cordyceps sinensis*. *J. Appl. Microbiol.* 2006;101(2):275–283.
- 798 [74] Barseghyan GS, Holliday JC, Price TC, Madison LM, Wasser SP. Growth and cultural-morphological  
799 characteristics of vegetative mycelia of medicinal caterpillar fungus *Ophiocordyceps sinensis* G.H. Sung et al.  
800 (Ascomycetes) Isolates from Tibetan Plateau (P.R.China). *Intl. J. Med. Mushrooms.* 2011;13(6):565–581.
- 801 [75] Huelsenbeck JP, Ronquist F. MRBAYES: Bayesian inference of phylogeny. *Bioinformat.* 2001;17:754–755.
- 802 [76] Bushley KE, Li Y, Wang W-J, Wang X-L, Jiao L, Spatafora JW, et al. Isolation of the MAT1-1 mating type  
803 idiomorph and evidence for selfing in the Chinese medicinal fungus *Ophiocordyceps sinensis*. *Fungal Biol.*  
804 2013;117(9):599–610.
- 805 [77] Li Y-L, Yao Y-S, Zhang Z-H, Xu H-F, Liu X, Ma S-L, et al. Synergy of fungal complexes isolated from the  
806 intestines of *Hepialus lagii* larvae in increasing infection potency. *J. Fungal Res.* 2016;14:96–112.
- 807 [78] Zhang, S.; Zhang, Y.-J. Molecular evolution of three protein-coding genes in the Chinese caterpillar fungus  
808 *Ophiocordyceps sinensis*. *Microbiol. China.* 2015;42(8):1549–1560.
- 809 [79] Liu Z-Q, Lin S, Baker PJ, Wu L-F, Wang X-R, Wu H, Xu F, et al. Transcriptome sequencing and analysis of the  
810 entomopathogenic fungus *Hirsutella sinensis* isolated from *Ophiocordyceps sinensis*. *BMC Genomics.*  
811 2015;16:106–123.
- 812 [80] Pang F, Wang L-P, Jin Y, Guo L-P, Song L-P, Liu G-M, et al. Transcriptome analysis of *Paecilomyces hepiali* at  
813 different growth stages and culture additives to reveal putative genes in cordycepin biosynthesis. *Genomics*  
814 2018;110:162–170.
- 815 [81] Zhang S, Zhang Y-J, Shrestha B, Xu J-P, Wang C-S, et al. *Ophiocordyceps sinensis* and *Cordyceps militaris*:  
816 research advances, issues and perspectives. *Mycosystema.* 2013;32:577–597.
- 817 [82] Ma S-L, Zhang Z-H, Xu H-F, Liu X, Li Y-L. Analysis microorganism flora isolated from the intestine of living  
818 larvae of *Hepialus lagii* Yan SP Nov. and inoculation studies. *Edible Fungi.* 2014;3:28–30.
- 819 [83] Quandt CA, Kepler RM, Gams W, Araújo JPM, Ban S, Evans HC, et al. Phylogenetic-based nomenclatural  
820 proposals for *Ophiocordycipitaceae* (Hypocreales) with new combinations in *Tolyocladium*. *IMA Fungus*  
821 2014;5:121–134.
- 822
- 823

824 **TABLES**

825 **Table 1. ITS5/ITS4 universal primers and genotype- and species-specific primers used for the PCR**  
 826 **amplification and sequencing of ITS segments**

| Primer                                                                                                                                       | Direction | Primer sequence               |
|----------------------------------------------------------------------------------------------------------------------------------------------|-----------|-------------------------------|
| <b><u>Universal Primers</u></b>                                                                                                              |           |                               |
| <i>ITS5</i>                                                                                                                                  | Forward   | GGAAGTAAAAGTCGTAACAAGG        |
| <i>ITS4</i>                                                                                                                                  | Reverse   | TCCTCCGCTTATTGATATGC          |
| <b><u>Genotype-specific primers designed based on AB067721 of the GC-biased Genotype #1 <i>H. sinensis</i></u></b>                           |           |                               |
| <i>Hsprp1</i>                                                                                                                                | Forward   | ATTATCGAGTCACCACTCCCAAACCC    |
| <i>Hsprp2</i>                                                                                                                                | Reverse   | ATTTGCTTGCTTCTTGACTGAGAGATGCC |
| <i>Hsprp3</i>                                                                                                                                | Reverse   | CGAGGTTCTCAGCGAGCTACT         |
| <b><u>Genotype-specific primers designed based on AB067744 and AB067740 of the AT-biased <i>O. sinensis</i> genotypes</u></b>                |           |                               |
| <i>HsATp1</i>                                                                                                                                | Forward   | AAGGTCTCCGTTAGTAACT           |
| <i>HsATp2</i>                                                                                                                                | Reverse   | GGGGCTCGAGGGTTAAGATA          |
| <i>HsATp3</i>                                                                                                                                | Reverse   | GGGGCTTAAGGGTTAAGGTA          |
| <b><u>Species-specific primers designed based on DQ189229 of <i>Geomyces pannorum</i> and AY608922 of <i>Pseudogymnoascus roseus</i></u></b> |           |                               |
| <i>Prp2</i>                                                                                                                                  | Forward   | ATTACACTTTGTTGCTTTGGCA        |
| <i>Prp5</i>                                                                                                                                  | Reverse   | GCTGGCGAGCACACGACCGGACCT      |
| <b><u>Species-specific primers designed based on DQ336710 of <i>Penicillium chrysogenum</i></u></b>                                          |           |                               |
| <i>Pcp3</i>                                                                                                                                  | Forward   | GAGGGCCCTCTGGGTCCAACC         |
| <i>Pcp7</i>                                                                                                                                  | Reverse   | CCCATACGCTCGAGGACC            |
| <b><u>Species-specific primers designed based on EF555097 of <i>Samoneilla hepiali</i> (= <i>Paecilomyces hepiali</i>)</u></b>               |           |                               |
| <i>Php4</i>                                                                                                                                  | Forward   | GTATCTTCTGAATCCGCCGCAAGGC     |
| <i>Php6</i>                                                                                                                                  | Reverse   | AACGTTCAGAAGTCGGGGGTTTAC      |
| <b><u>Species-specific primers designed based on DQ097715 of <i>Tolypocladium sinensis</i></u></b>                                           |           |                               |
| <i>Tsp1</i>                                                                                                                                  | Forward   | GACCGCCCCGGCGCCCTCG           |
| <i>Tsp3</i>                                                                                                                                  | Reverse   | TGACCGTCTCCGCGCT              |
| <b><u>Primers used for PCR2.1 vector clone sequencing</u></b>                                                                                |           |                               |
| <i>M13F</i>                                                                                                                                  | Forward   | TGTAACACGACGGCGT              |
| <i>M13R</i>                                                                                                                                  | Reverse   | CAGGAAACAGCTATCC              |

827

828

829 **Table 2. Differential occurrence of multiple genotypes of *O. sinensis*, *S. hepiali* and the AB067719-type**  
 830 **fungus in the compartments of natural *C. sinensis***

| Genotype                 | Representative sequence | Stroma   |        | SFP (with ascocarps) | Ascospores    |              |
|--------------------------|-------------------------|----------|--------|----------------------|---------------|--------------|
|                          |                         | Immature | Mature |                      | Fully ejected | Semi-ejected |
| #1                       | AB067721                | √        | √      | √                    | √             | √            |
| #2                       | MG770309                | √        | √      |                      |               |              |
| #4                       | AB067744                | √        | √      | √                    |               |              |
| #5                       | AB067740                | √        | √      | √                    | √             | √            |
| #6                       | EU555436                | √        | √      | √                    | √             |              |
| #13                      | KT339190                |          |        |                      |               | √            |
| #14                      | KT339178                |          |        |                      | √             |              |
| #15                      | KT232017                | √        | √      | √                    |               |              |
| #16                      | KT232019                | √        |        |                      | √             |              |
| #17                      | KT232010                | √        |        |                      |               |              |
| <i>S. hepiali</i>        | EF555097                | √        | √      | √                    | √             | √            |
| The AB067719-type fungus | AB067719                | √        | √      | √                    | √             | √            |

831  
 832  
 833

834  
835

**Table 3. Sequence similarities of the ITS1, 5.8S and ITS2 segments of Genotype #1 and AB067719-type sequences compared with the multiple genotypes of *O. sinensis***

| Genotype and representative sequence                    | ITS1        | 5.8S gene   | ITS2        | ITS1-5.8S-ITS2 (excluding the 18S and 28S segments) |
|---------------------------------------------------------|-------------|-------------|-------------|-----------------------------------------------------|
| Genotype #1 (AB067721) vs. sequences of other genotypes |             |             |             |                                                     |
| #2 MG770309                                             | 83.6%       | 97.4%       | 100%        | 94.7%                                               |
| #3 HM595984                                             | 94.3%       | 99.4%       | 93.0%       | 95.5%                                               |
| #4 AB067744                                             | 90.6%       | 85.3%       | 89.2%       | 88.4%                                               |
| #5 AB067740                                             | 80.5%       | 86.5%       | 89.2%       | 85.5%                                               |
| #6 EU555436                                             | 84.7%       | 87.8%       | 85.8%       | 86.0%                                               |
| #7 AJ488254                                             | 93.2%       | 98.7%       | 89.4%       | 93.9%                                               |
| #8 GU246286                                             | 86.2%       | 94.8%       | 87.9%       | 89.6%                                               |
| #9 GU246288                                             | 96.3%       | 98.7%       | 91.5%       | 95.3%                                               |
| #10 GU246287                                            | 86.2%       | 92.9%       | 72.4%       | 83.2%                                               |
| #11 JQ695935                                            | 94.3%       | 100%        | 55.1%       | 81.6%                                               |
| #12 GU246296                                            | 99.4%       | 99.4%       | 87.0%       | 94.9%                                               |
| #13 KT339190                                            | <b>100%</b> | 94.8%       | 64.2%       | 86.3%                                               |
| #14 KT339178                                            | 67.9%       | 94.9%       | <b>100%</b> | 87.7%                                               |
| #15 KT232017                                            | 91.8%       | 86.5%       | 91.7%       | 89.9%                                               |
| #16 KT232019                                            | 84.3%       | 88.2%       | 90.7%       | 87.3%                                               |
| #17 KT232010                                            | 83.0%       | 88.5%       | 91.7%       | 87.7%                                               |
| AB067719 (Group E) vs. sequences of Genotypes #13–14    |             |             |             |                                                     |
| #13 KT339190                                            | 71.5%       | <b>100%</b> | <b>99%</b>  | 88.2%                                               |
| #14 KT339178                                            | <b>100%</b> | <b>100%</b> | 71.5%       | 89.2%                                               |

836  
837



---

838 **FIGURE LEGENDS**

839 **Fig 1. Cultivation of mature *C. sinensis* specimens in paper cups and collection of ascospores.** Mature *C.*  
840 *sinensis* specimens were cultivated in our Xining laboratory (altitude of 2,200 m). (left panel). Numerous semi-  
841 ejected ascospores adhere to the outer surface of an ascus (right panel) during the massive ejection of ascospores.

842  
843 **Fig 2. Alignment of the ITS sequences of GC- and AT-biased genotypes of *O. sinensis* with multiple**  
844 **transition point mutations.** GT represents genotype. Genotypes #1–3 are GC-biased *O. sinensis* genotypes, and  
845 Genotypes #4–6 and #15–17 are AT-biased *O. sinensis* genotypes. The sequence segments shown in blue  
846 correspond to the primers designed based on the sequences of GC-biased genotypes, and those in red correspond  
847 to primers designed based on the sequences of AT-biased genotypes. The underlined “GAATTC” site shown in  
848 green is the enzymatic site of the *EcoRI* endonuclease, which is present in the GC-biased sequences at nucleotides  
849 294–299 in Genotype #1 but absent in the AT-biased sequences due to a single-base mutation (GAATTT). “(RC)”  
850 denotes the reverse complement sequence of the primers; “-” represents identical bases; and spaces indicate  
851 unmatched sequence gaps.

852  
853 **Fig 3. Microscopy images of fully ejected ascospores of *C. sinensis* without staining (upper panel; 40x) or**  
854 **after staining with 0.01% calmodulin for visualization of the septa of multicellular ascospores (lower panel;**  
855 **400x).**

856  
857 **Fig 4. Microscopy images of the SFP, ascocarps and ascospores of *C. sinensis*.** Panel 4A is a confocal image  
858 of a transverse section of the SFP (bar, 500  $\mu\text{m}$ ). Panel 4B is an optical microscopic image (10x) of several *C.*  
859 *sinensis* ascocarps stained with hematoxylin-eosin. Panel 4C is a close-up optical image (40x) of an ascocarp  
860 stained with hematoxylin-eosin. Panels 4D and 4E are close-up confocal images showing ascospores gathering  
861 toward the opening of the perithecium (4D; bar, 50  $\mu\text{m}$ ) and a semi-ejected ascospore hanging out of the opening  
862 of the perithecium (4E; bar, 20  $\mu\text{m}$ ).

863  
864 **Fig 5. Agarose gel electrophoresis of the PCR amplicons obtained from genomic DNA of the fully and semi-**  
865 **ejected ascospores of *C. sinensis* using the *Samsoniella hepiali*-specific *Php4/Php6* primers.** Lane M shows  
866 the molecular weight standard. Lanes 1 and 3 display the amplicon moieties amplified from the genomic DNA of  
867 the fully ejected ascospores. Lanes 2 and 4 show the amplicons amplified from the genomic DNA of the semi-  
868 ejected ascospores.

869  
870 **Fig 6. Schematic representation of the ITS segment sequences of the parental fungi (*H. sinensis* and the**  
871 **AB067719-type fungus) and *O. sinensis* offspring Genotypes #13–14.** The green bars indicate the ITS1  
872 segment; the pink bars refer to the 5.8S gene; and the blue bars represent the ITS2 segment. AB067719 [34] and  
873 KT339197 discovered in the current study represent the AB067719-type Group-E fungus and are shown with  
874 lighter bars. AB067721 [34] and KT339196 discovered in the current study represent Genotype #1 *H. sinensis*  
875 (Group-A by [66]) and are shown with darker bars. Alignment of the AB067719 and AB067721 sequences is

---

876 shown between the lighter bars for AB067719 and the darker bars for AB067721. KT339190 and KT339178  
877 represent *O. sinensis* offspring Genotypes #13 and #14, respectively, showing large DNA segment reciprocal  
878 substitutions and genetic material recombination between the genomes of the 2 parental fungi, *H. sinensis* and the  
879 AB067719-type fungus.

---

880  
881 **Fig 7. Bayesian phylogenetic analysis of multiple genotypes of *O. sinensis*.** Five ITS sequences of the whole  
882 genomes (ANOV01021709, LKHE01000582, LWBQ01000008, JAAVMX01000002 and JAAVMX010000019)  
883 of *H. sinensis* strains (Co18, 1229, ZJB12195 and IOZ07) and 59 ITS sequences of 17 genotypes of *O. sinensis*  
884 were analyzed. The Bayesian majority-rule consensus tree was inferred using MrBayes v3.2.7a software (Markov  
885 chain Monte Carlo [MCMC] algorithm) [75]. GC-biased Genotypes #1–3 and #7–14 of *O. sinensis* are indicated  
886 in blue alongside the tree, and the AT-biased Genotypes #4–6 and #15–17 of *O. sinensis* are indicated in red  
887 alongside the tree. The AB067719-type Group-E sequences indicated in purple alongside the tree as an outgroup  
888 control.

---

889  
890 **Fig 8. Dynamic alterations of the abundance of the amplicons of Genotypes #1 and #2 of *O. sinensis* in the**  
891 **stromata of *C. sinensis* during maturation (modified from Fig 6 of [28]).** Immature *C. sinensis* had a very  
892 short stroma of 1.5 cm. Maturing *C. sinensis* had a stroma of 4.0 cm without an expanded fertile portion close to  
893 the stroma tip. Mature *C. sinensis* had a long stroma of 7.0 cm and showed the formation of an expanded fertile  
894 portion close to the stroma tip, which was densely covered with ascocarps.

---

895

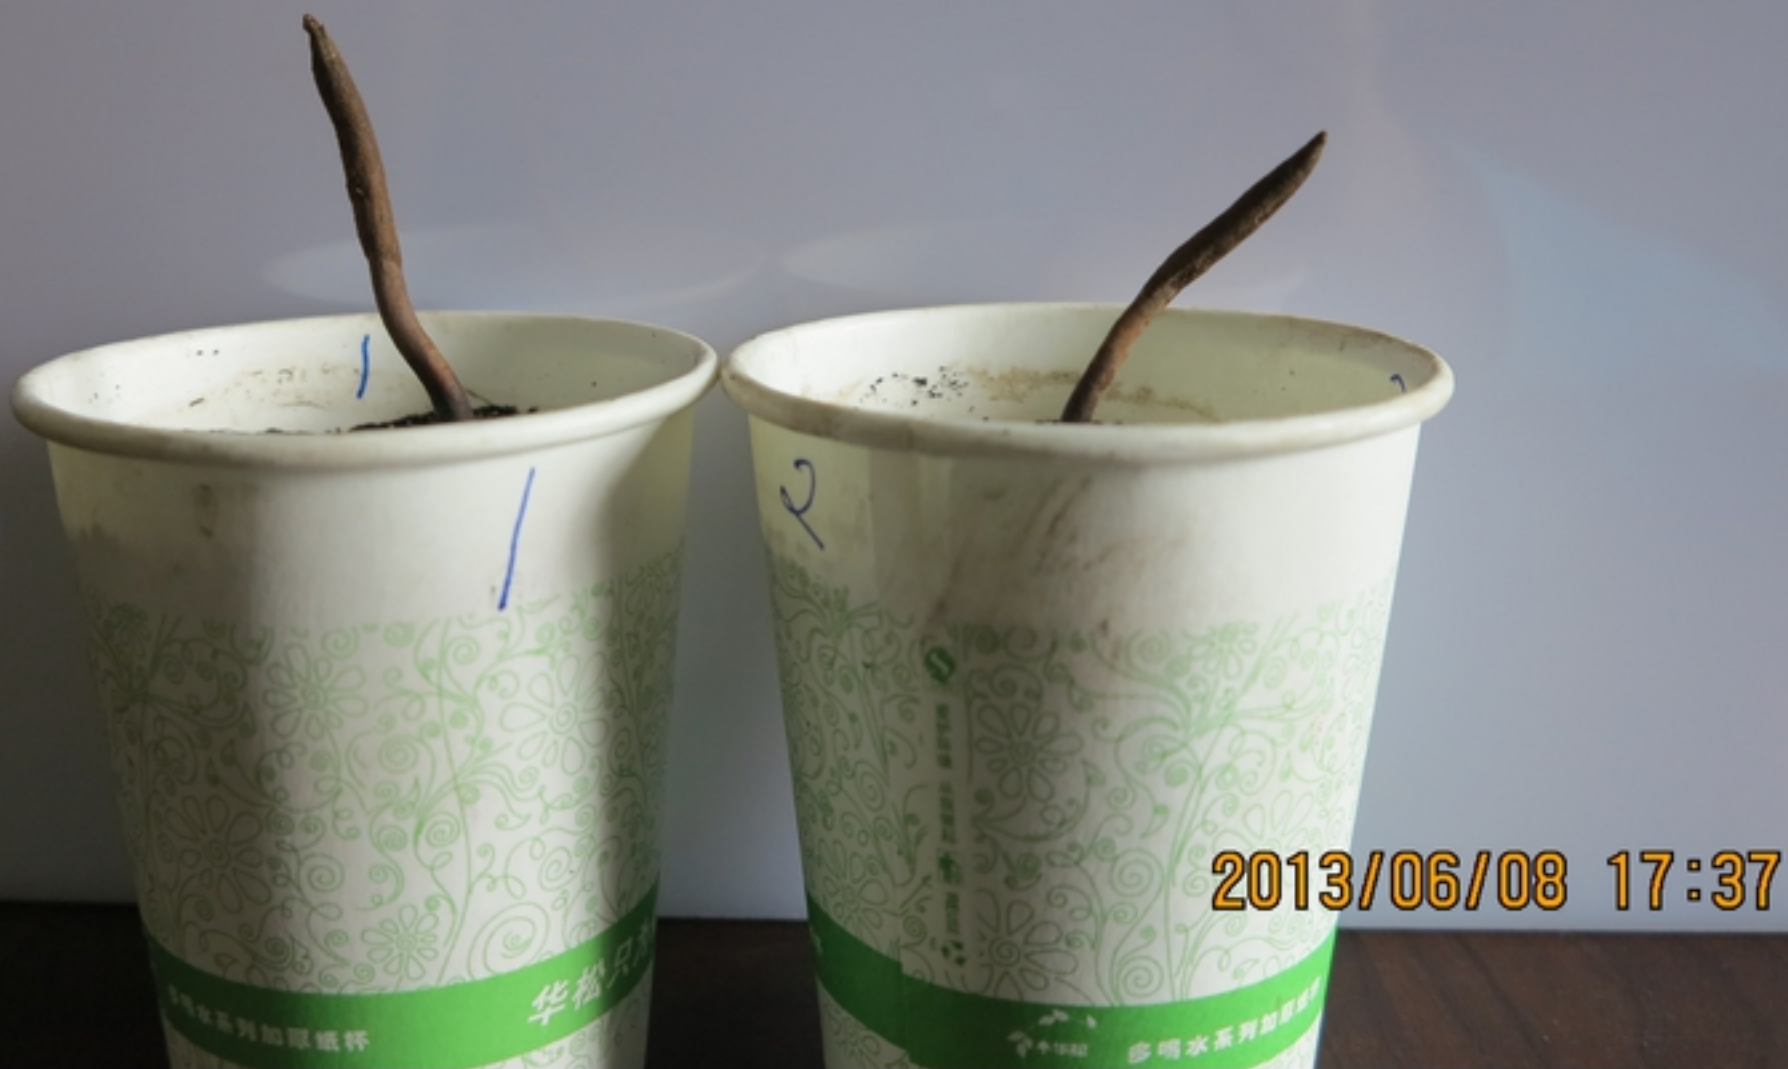

Figure 1 left



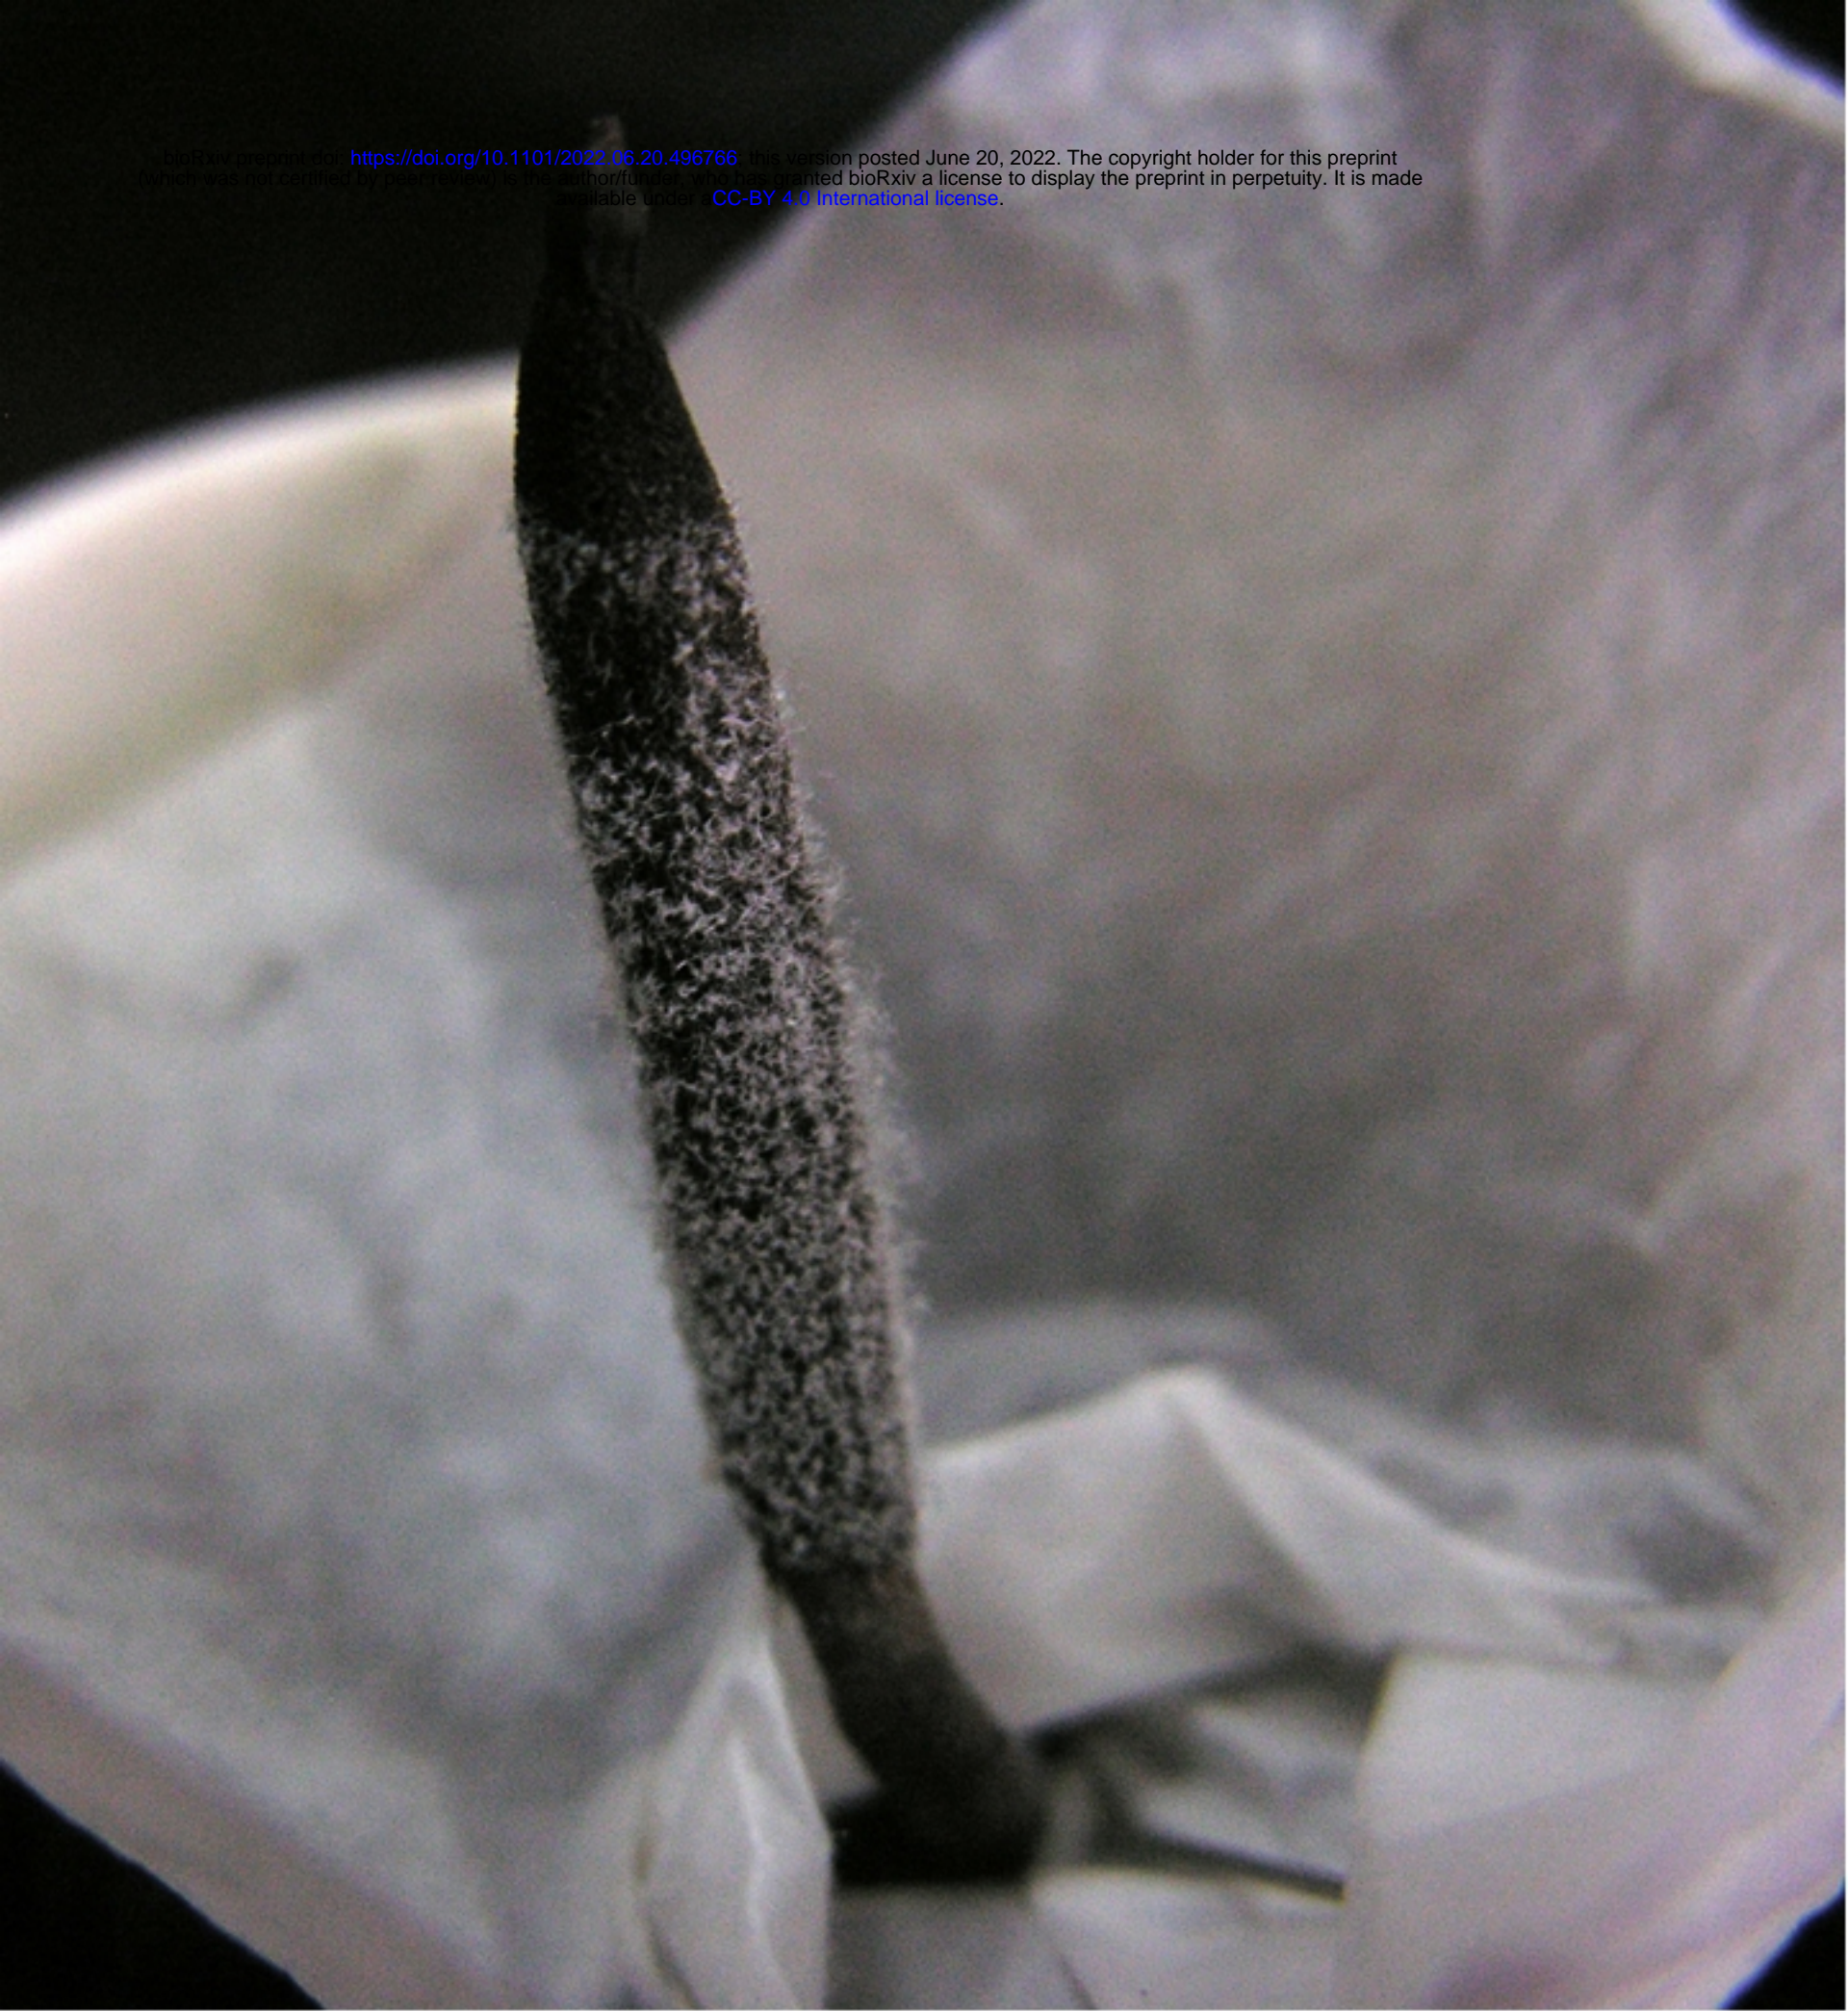

Figure 1 right



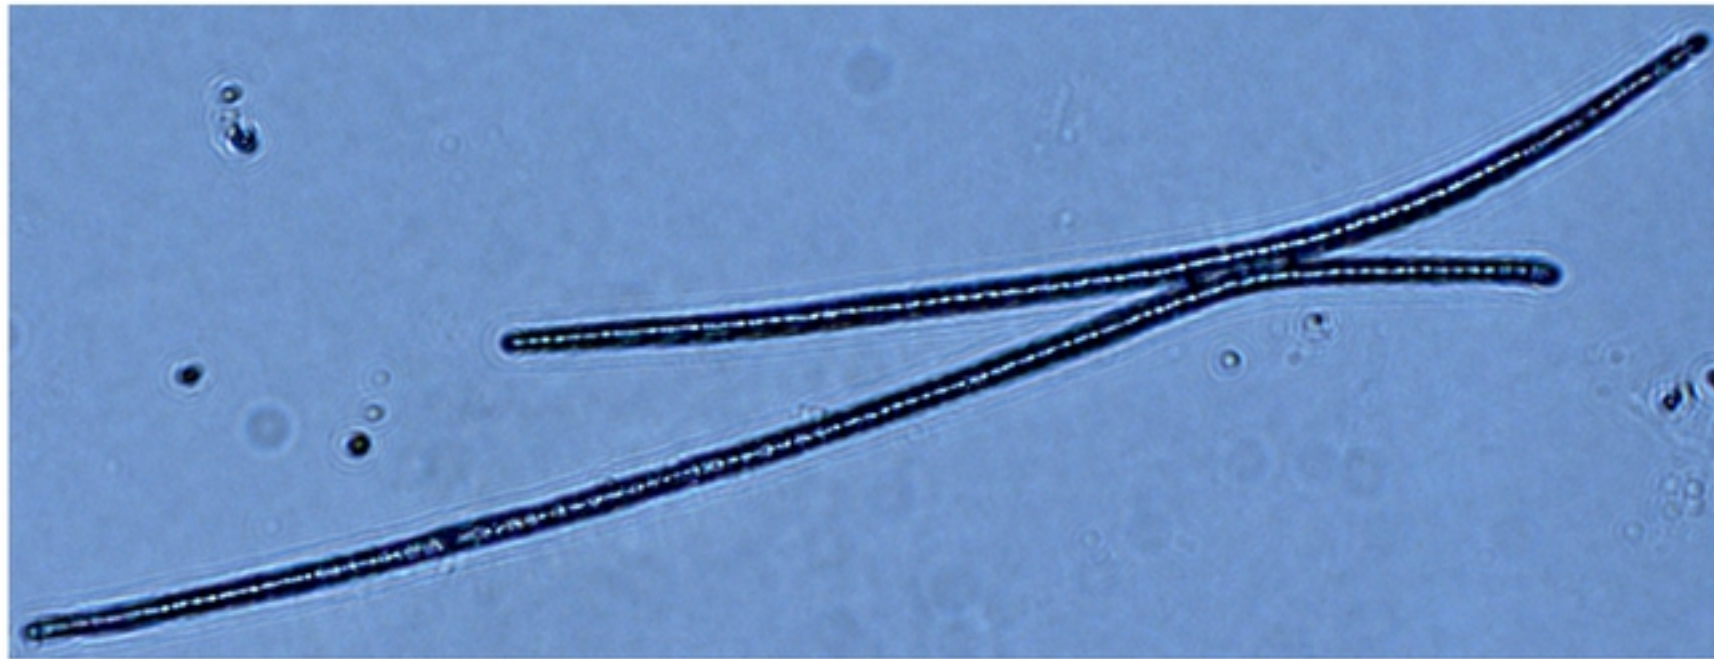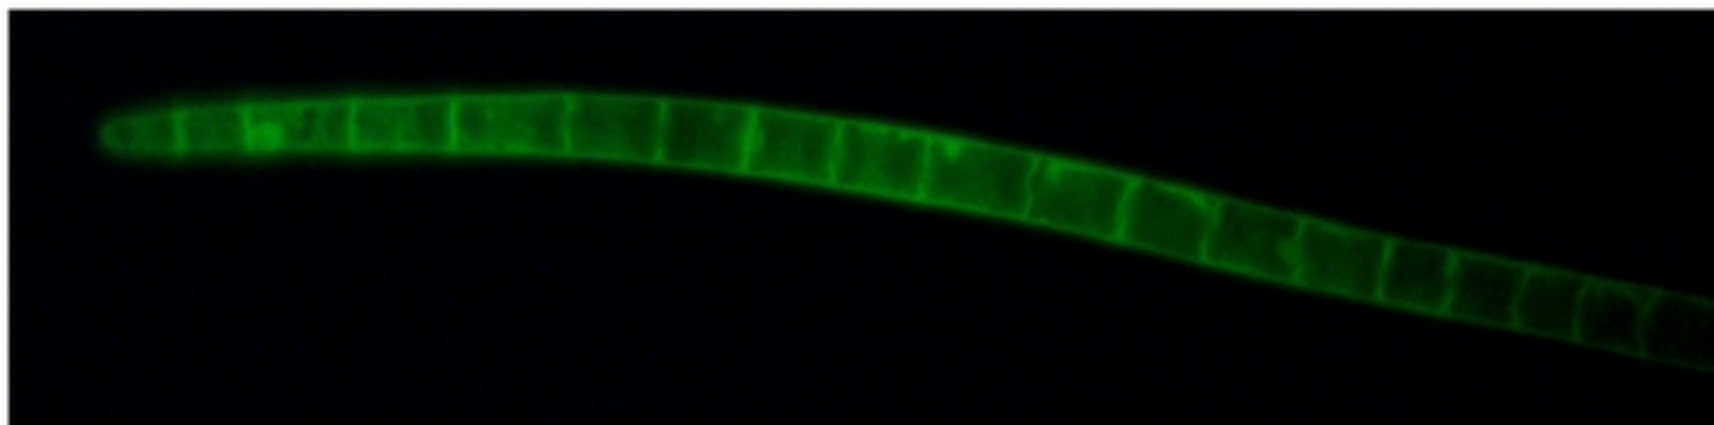

Figure 2

bioRxiv preprint doi: <https://doi.org/10.1101/2022.06.20.496768>; this version posted June 20, 2022. The copyright holder for this preprint (which was not certified by peer review) is the author/funder, who has granted bioRxiv a license to display the preprint in perpetuity. It is made available under aCC-BY 4.0 International license.

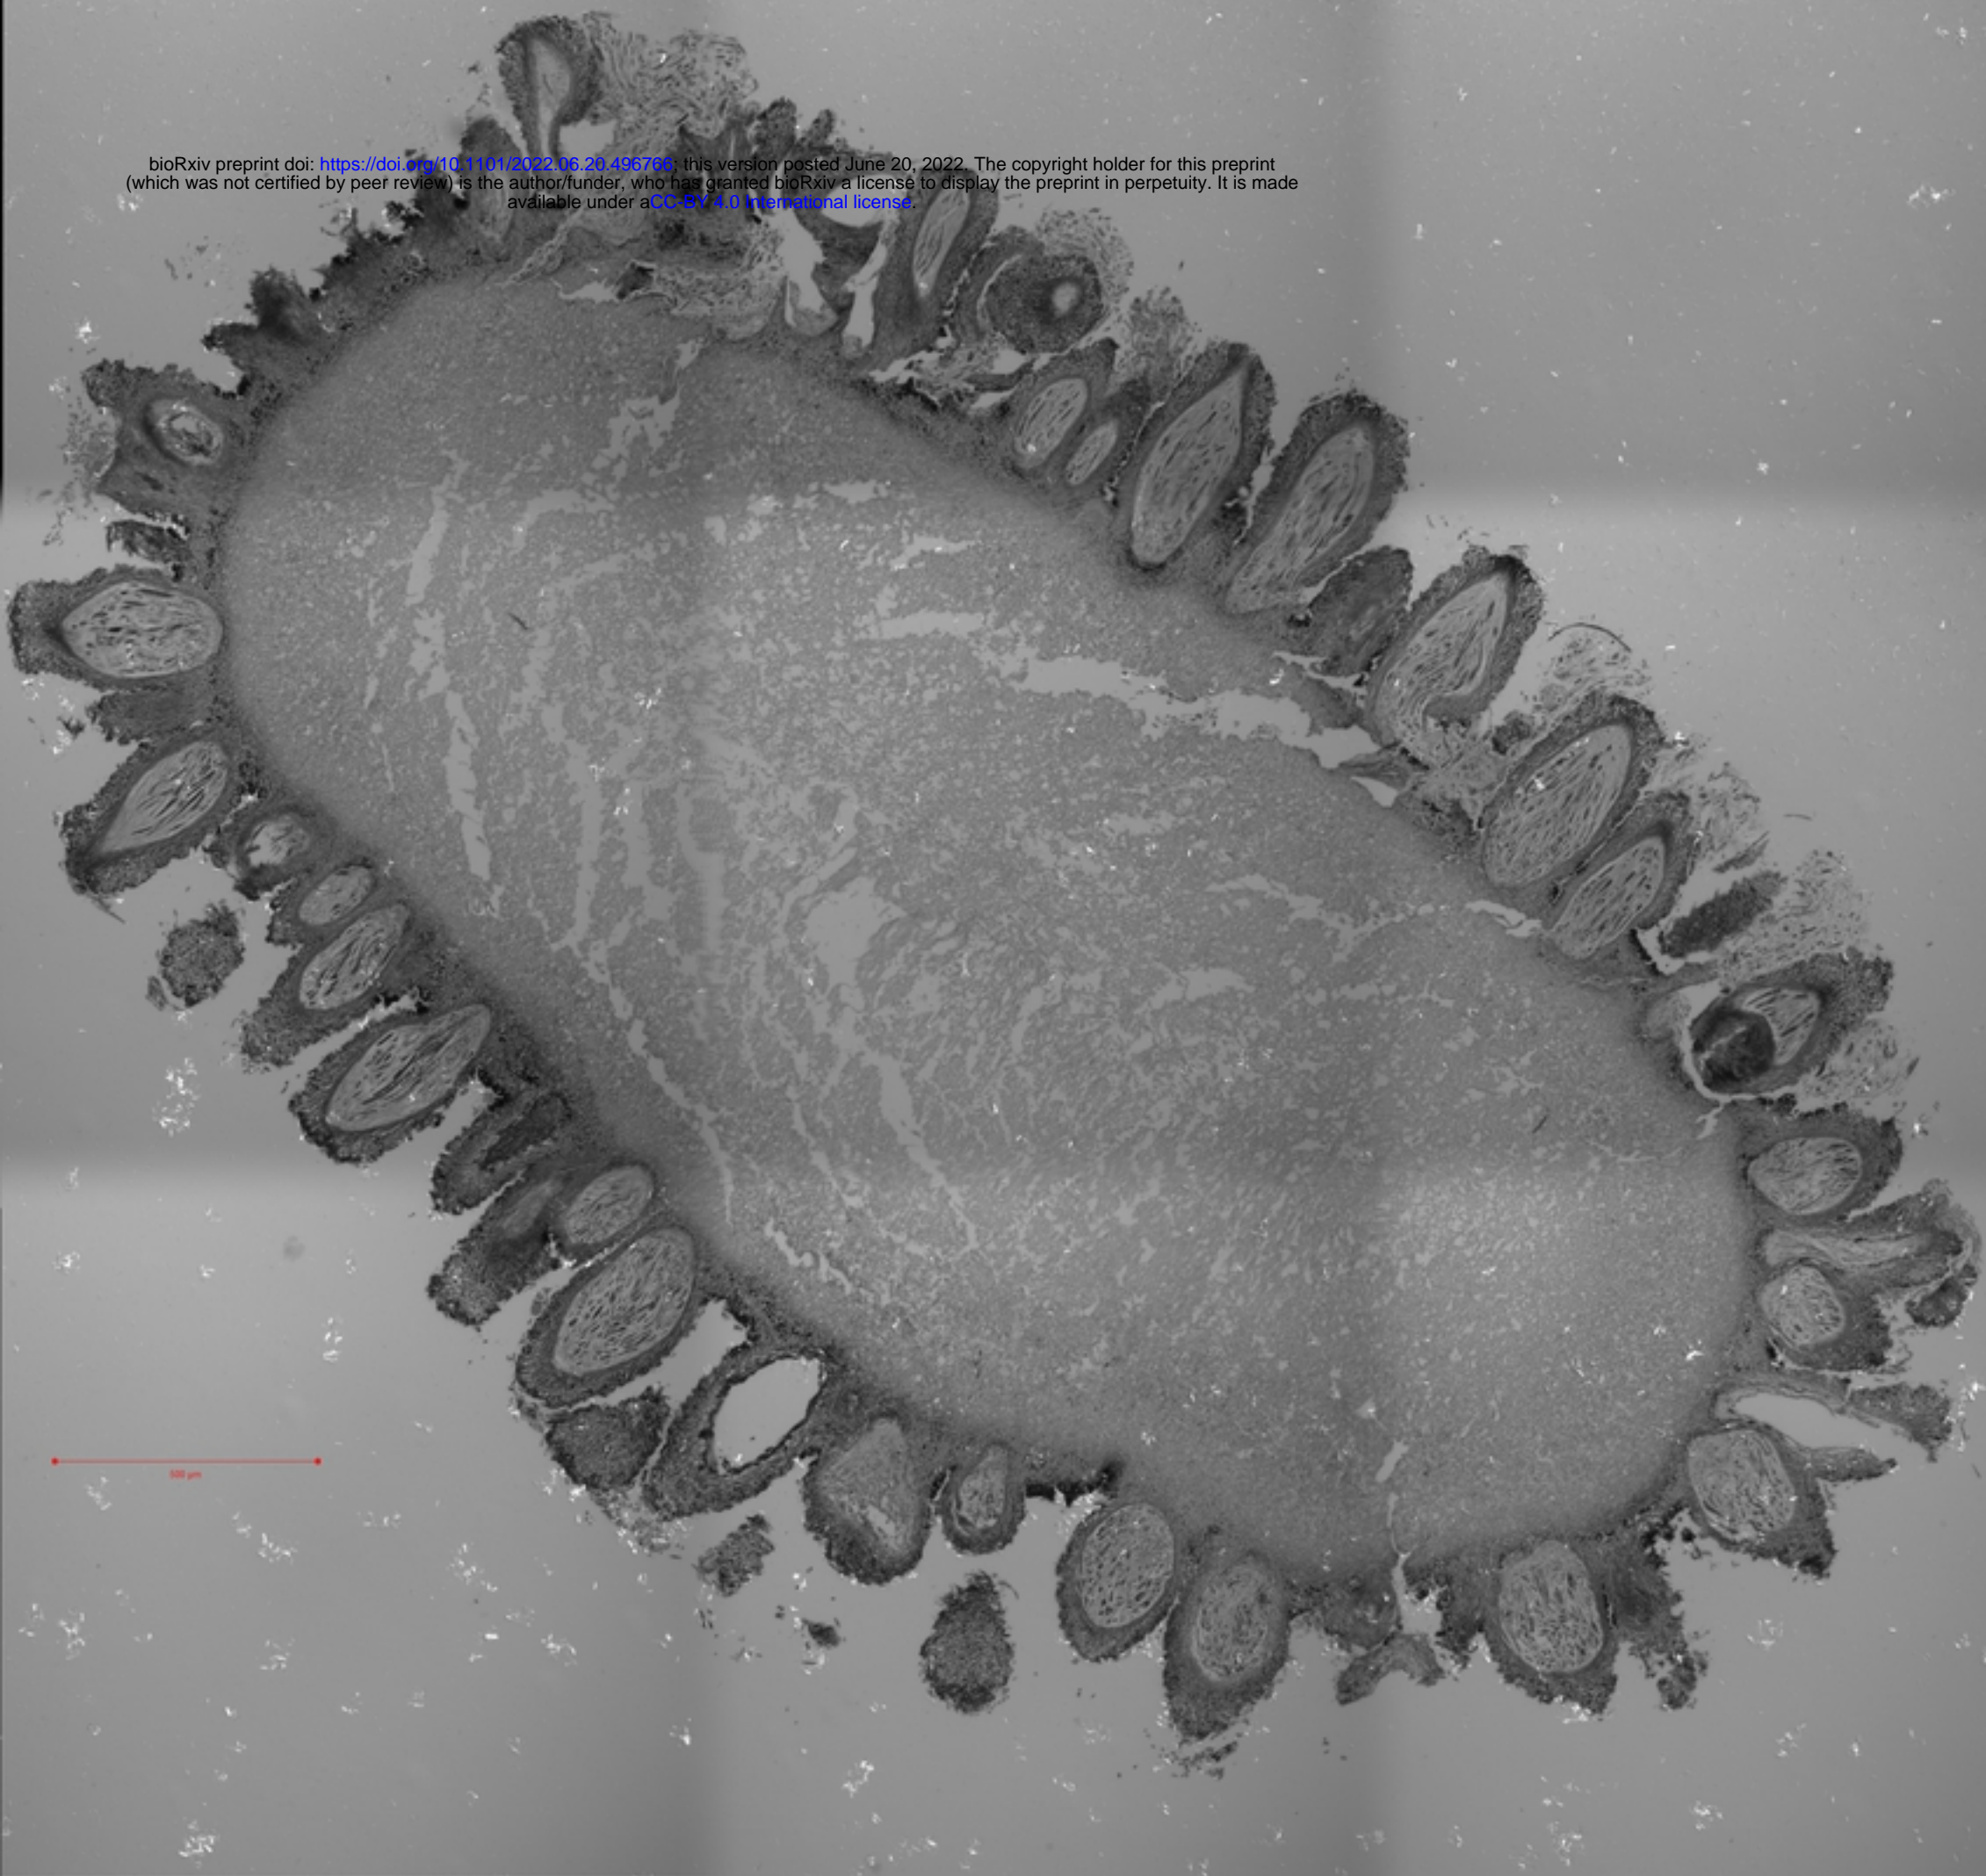

Figure 3A



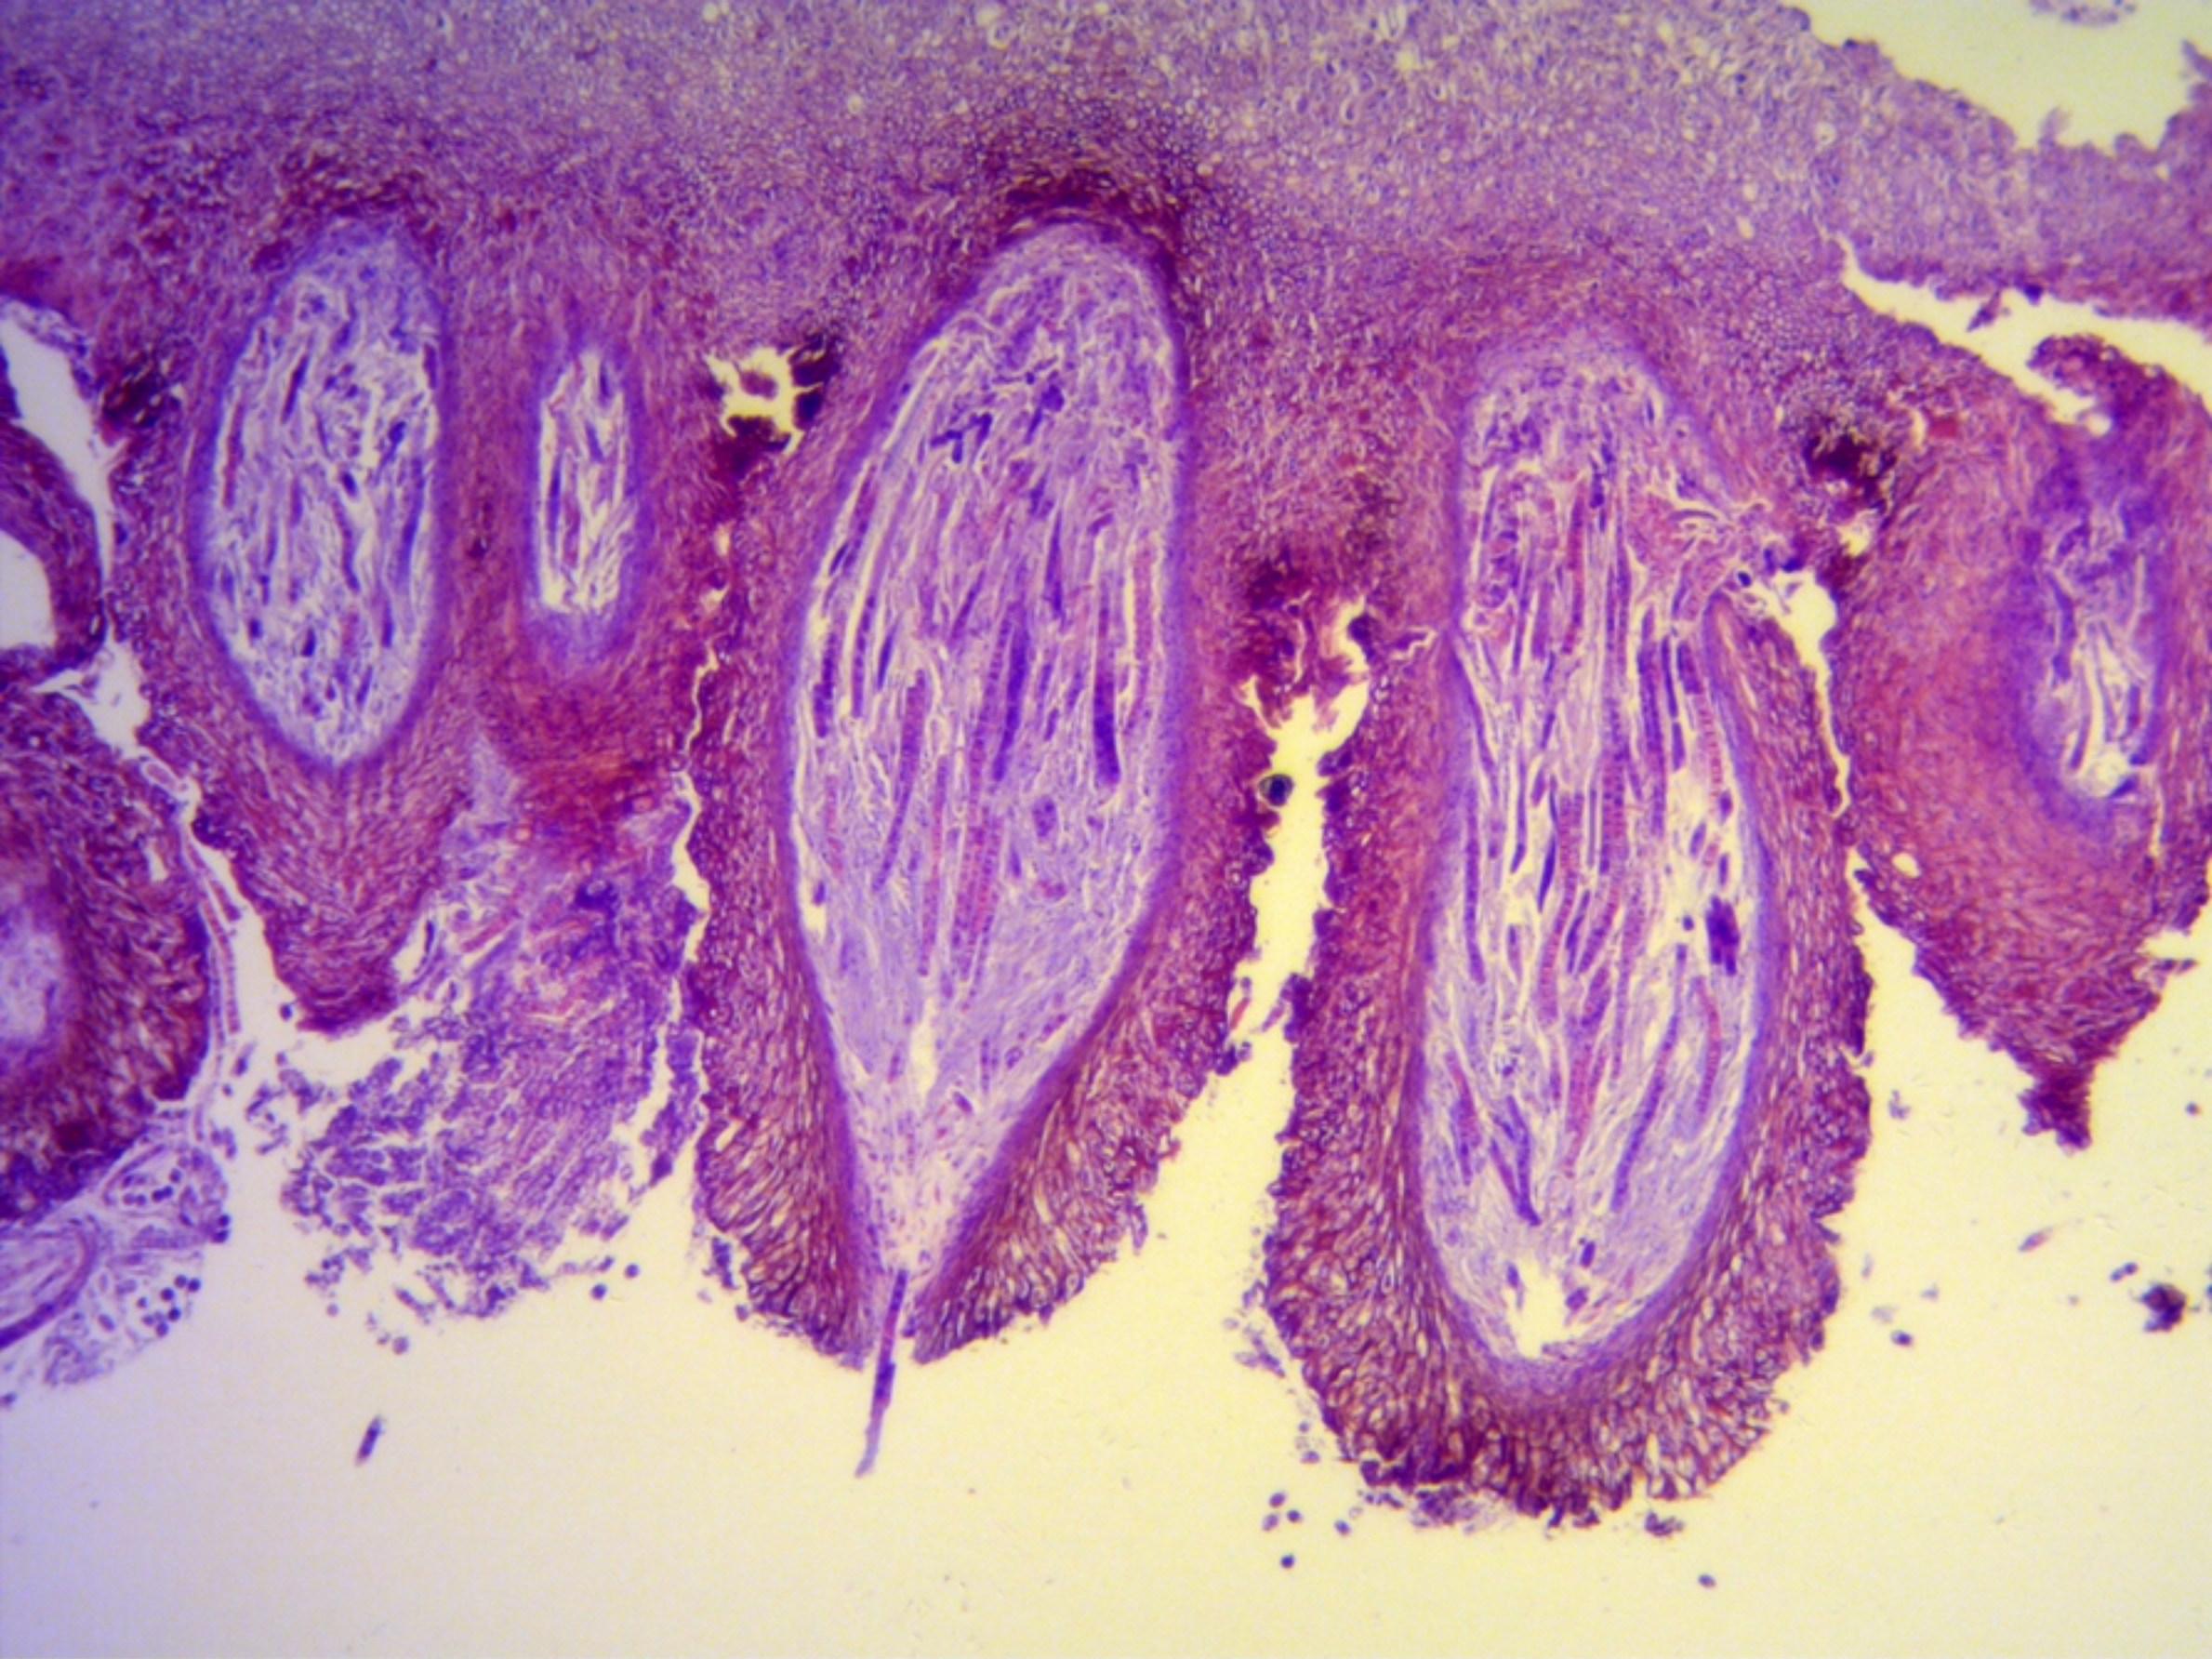

Figure 3B



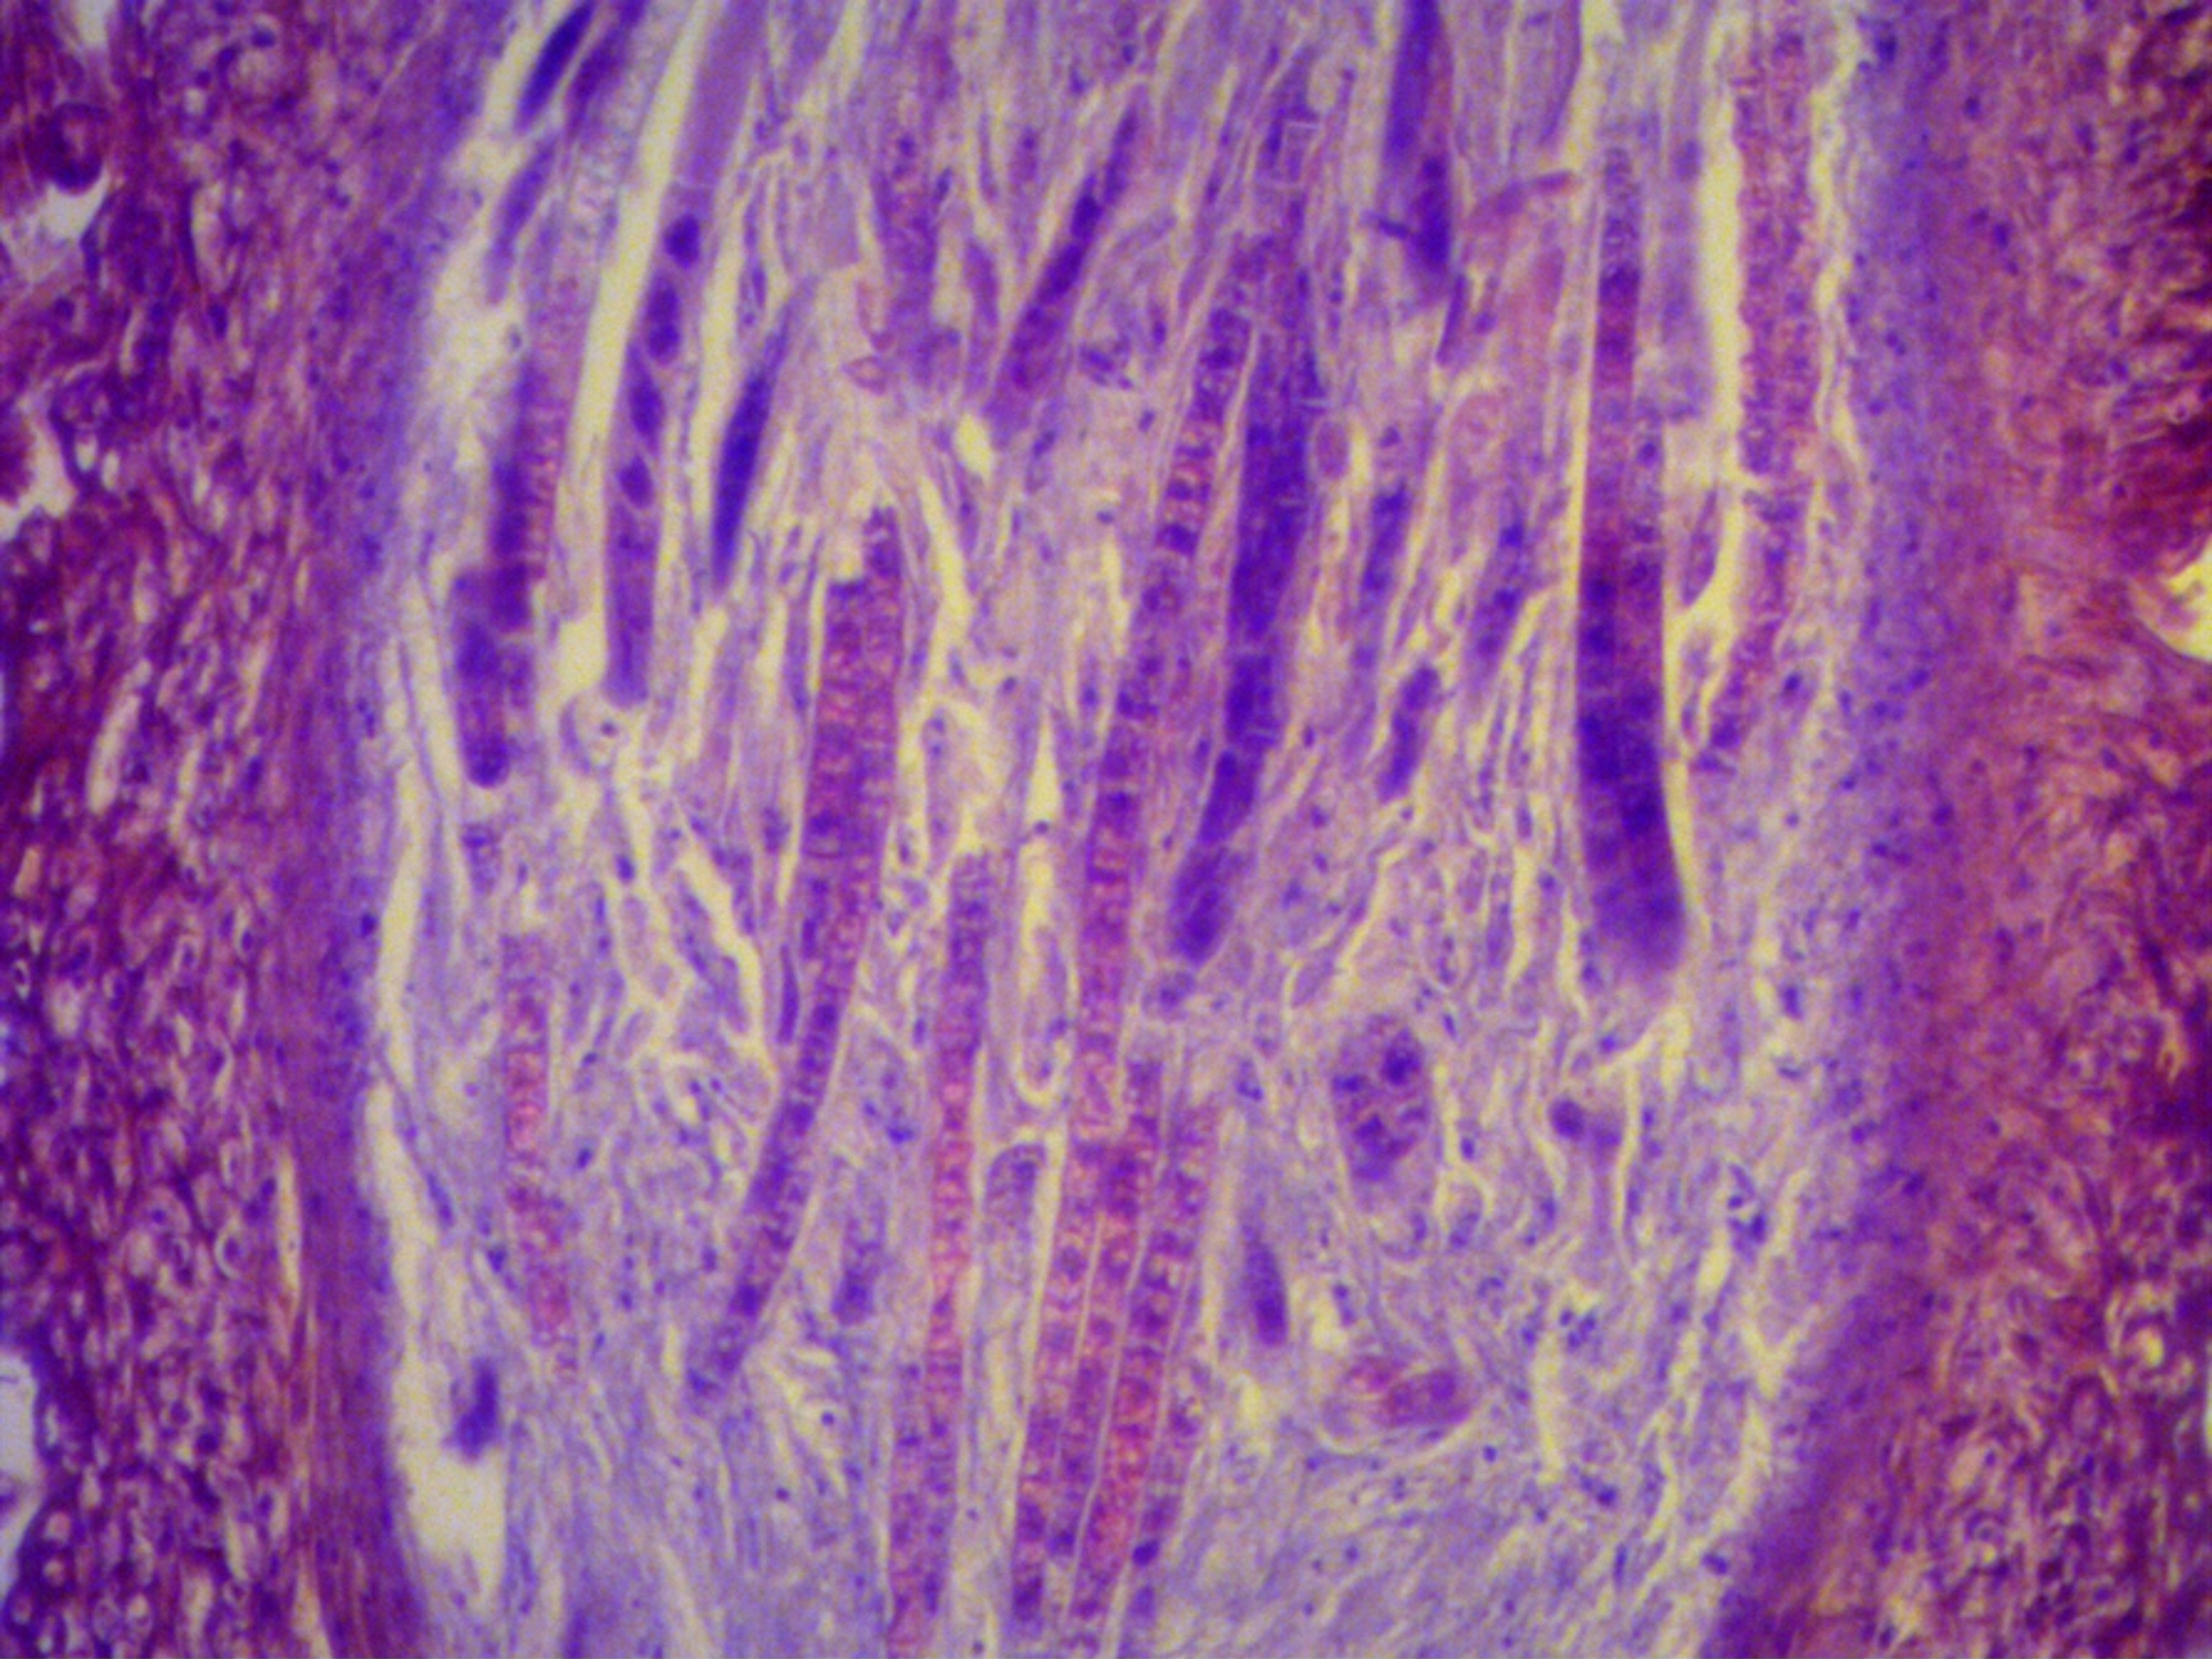

Figure 3C



bioRxiv preprint doi: <https://doi.org/10.1101/2022.06.20.496766>; this version posted June 20, 2022. The copyright holder for this preprint (which was not certified by peer review) is the author/funder, who has granted bioRxiv a license to display the preprint in perpetuity. It is made available under aCC-BY 4.0 International license.

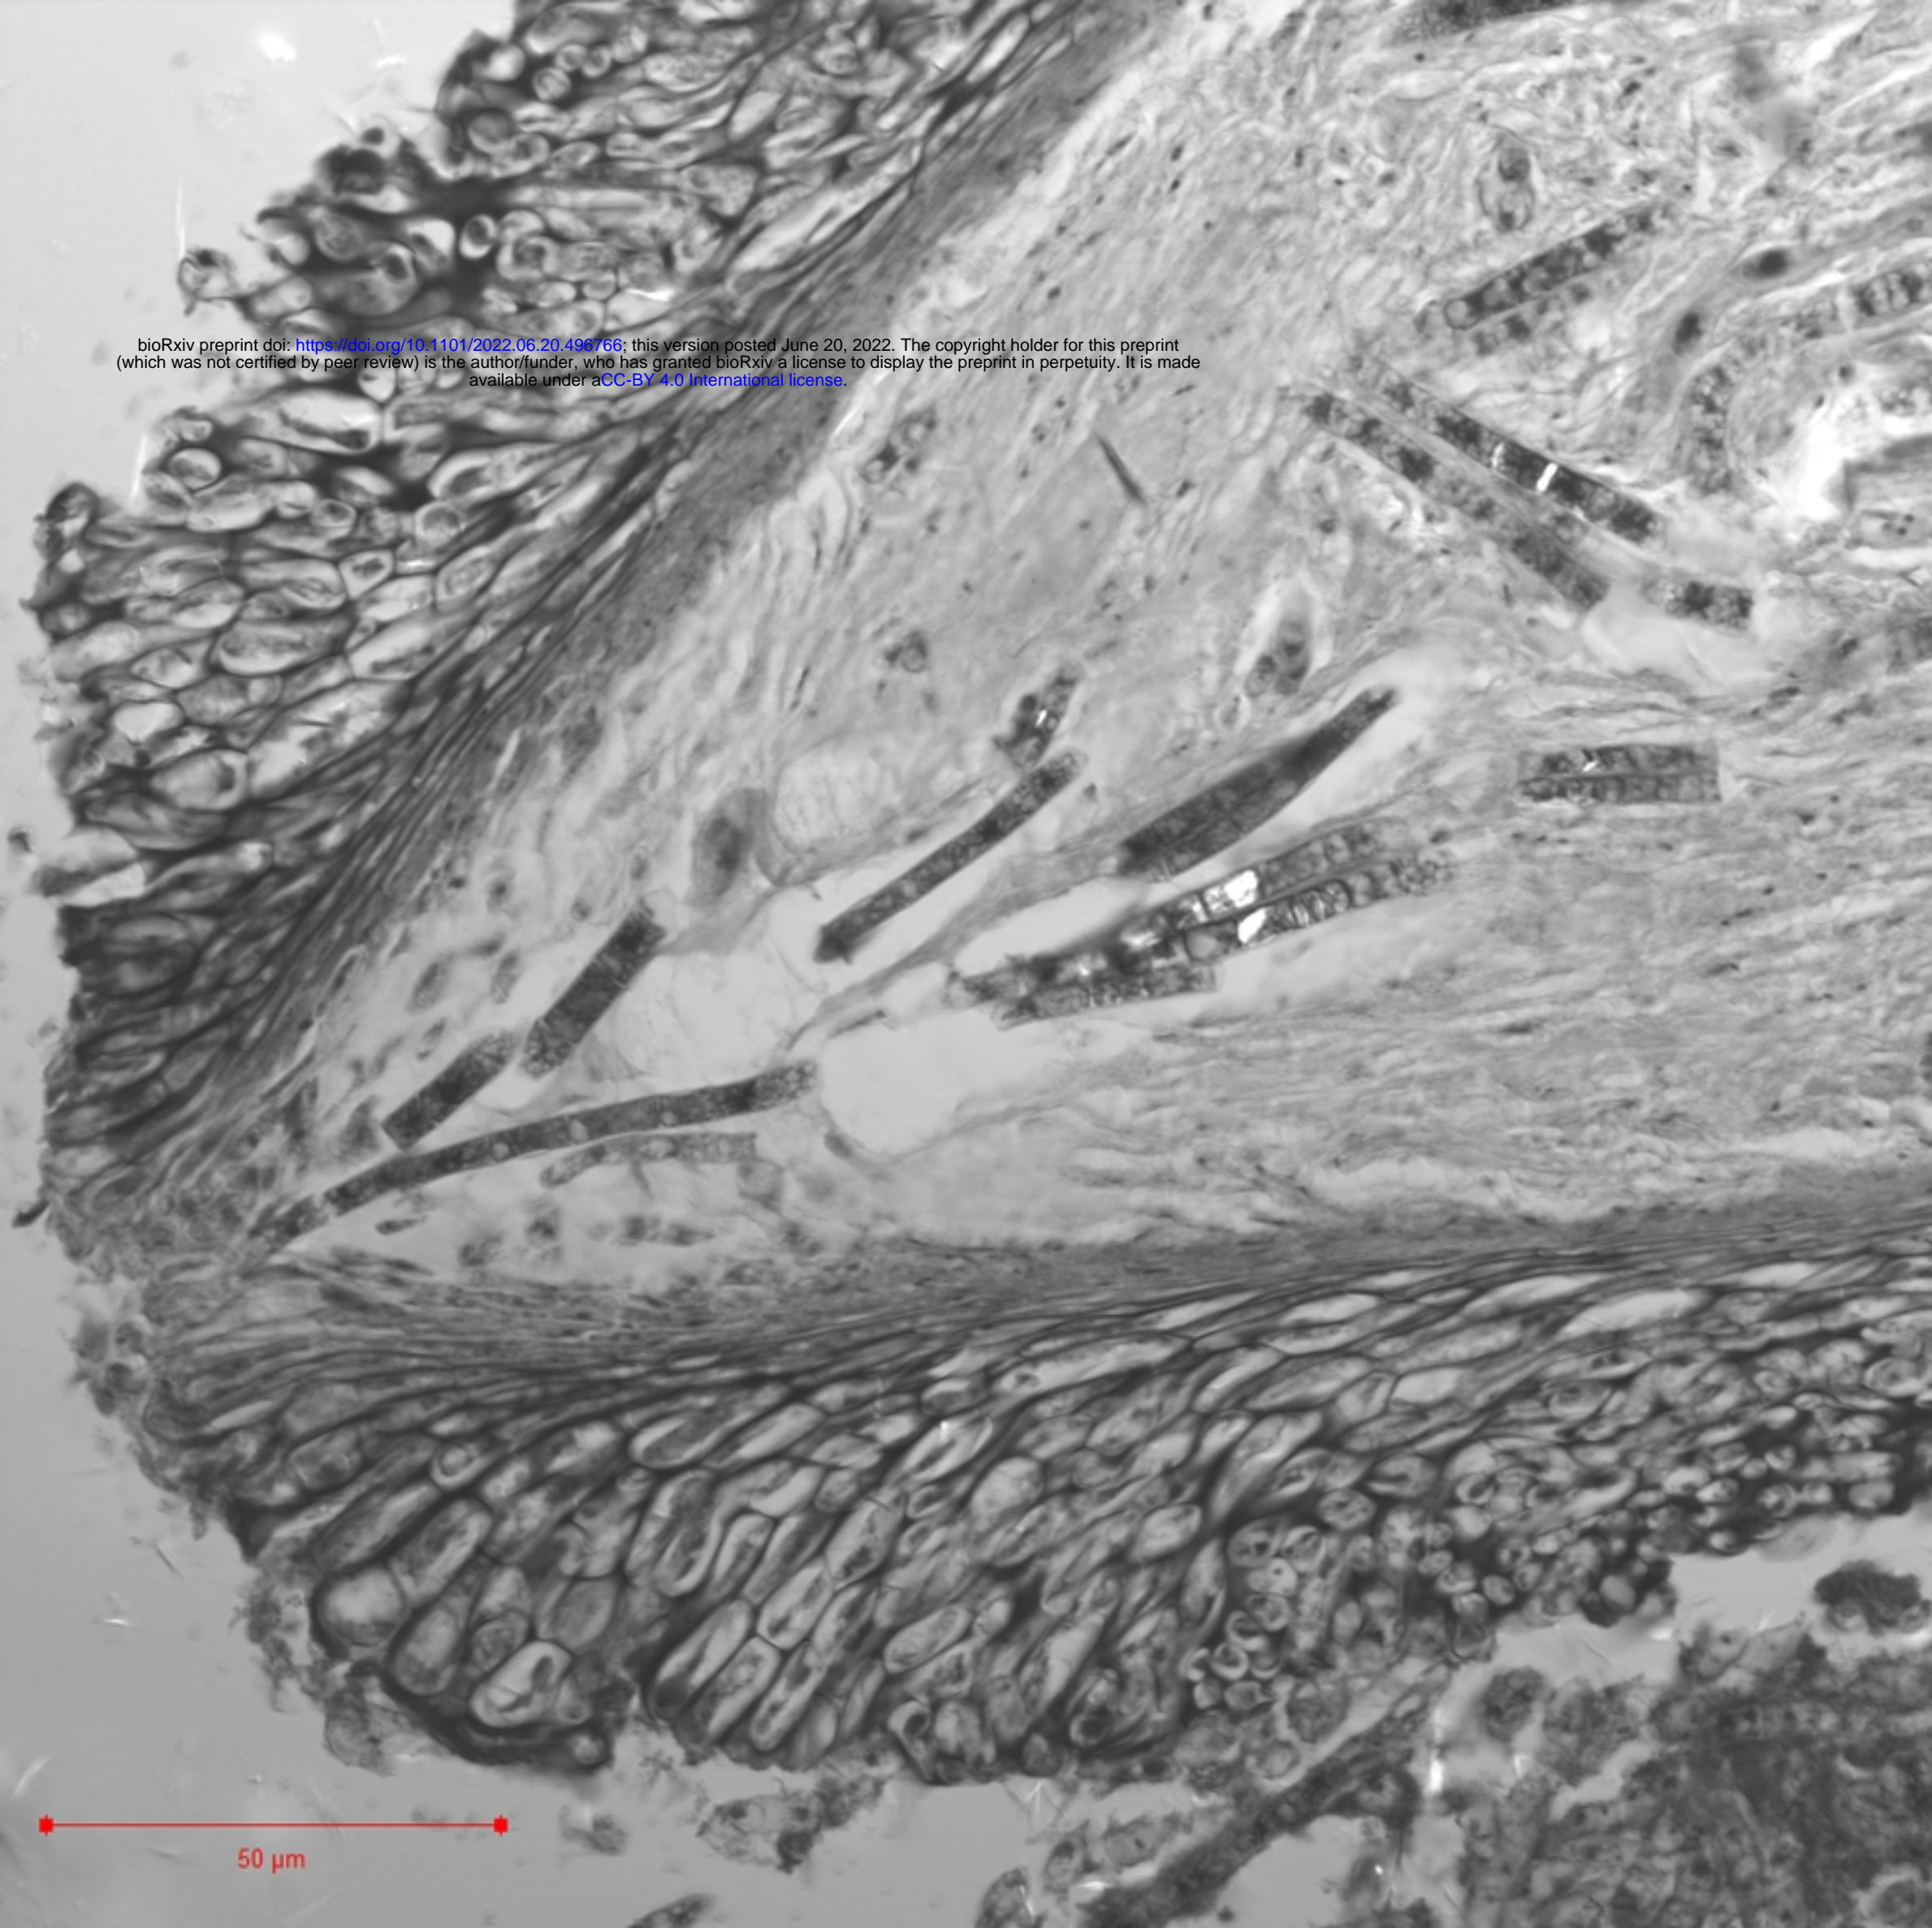

50  $\mu$ m

Figure 3D



bioRxiv preprint doi: <https://doi.org/10.1101/2022.06.20.496766>; this version posted June 20, 2022. The copyright holder for this preprint (which was not certified by peer review) is the author/funder, who has granted bioRxiv a license to display the preprint in perpetuity. It is made available under aCC-BY 4.0 International license.

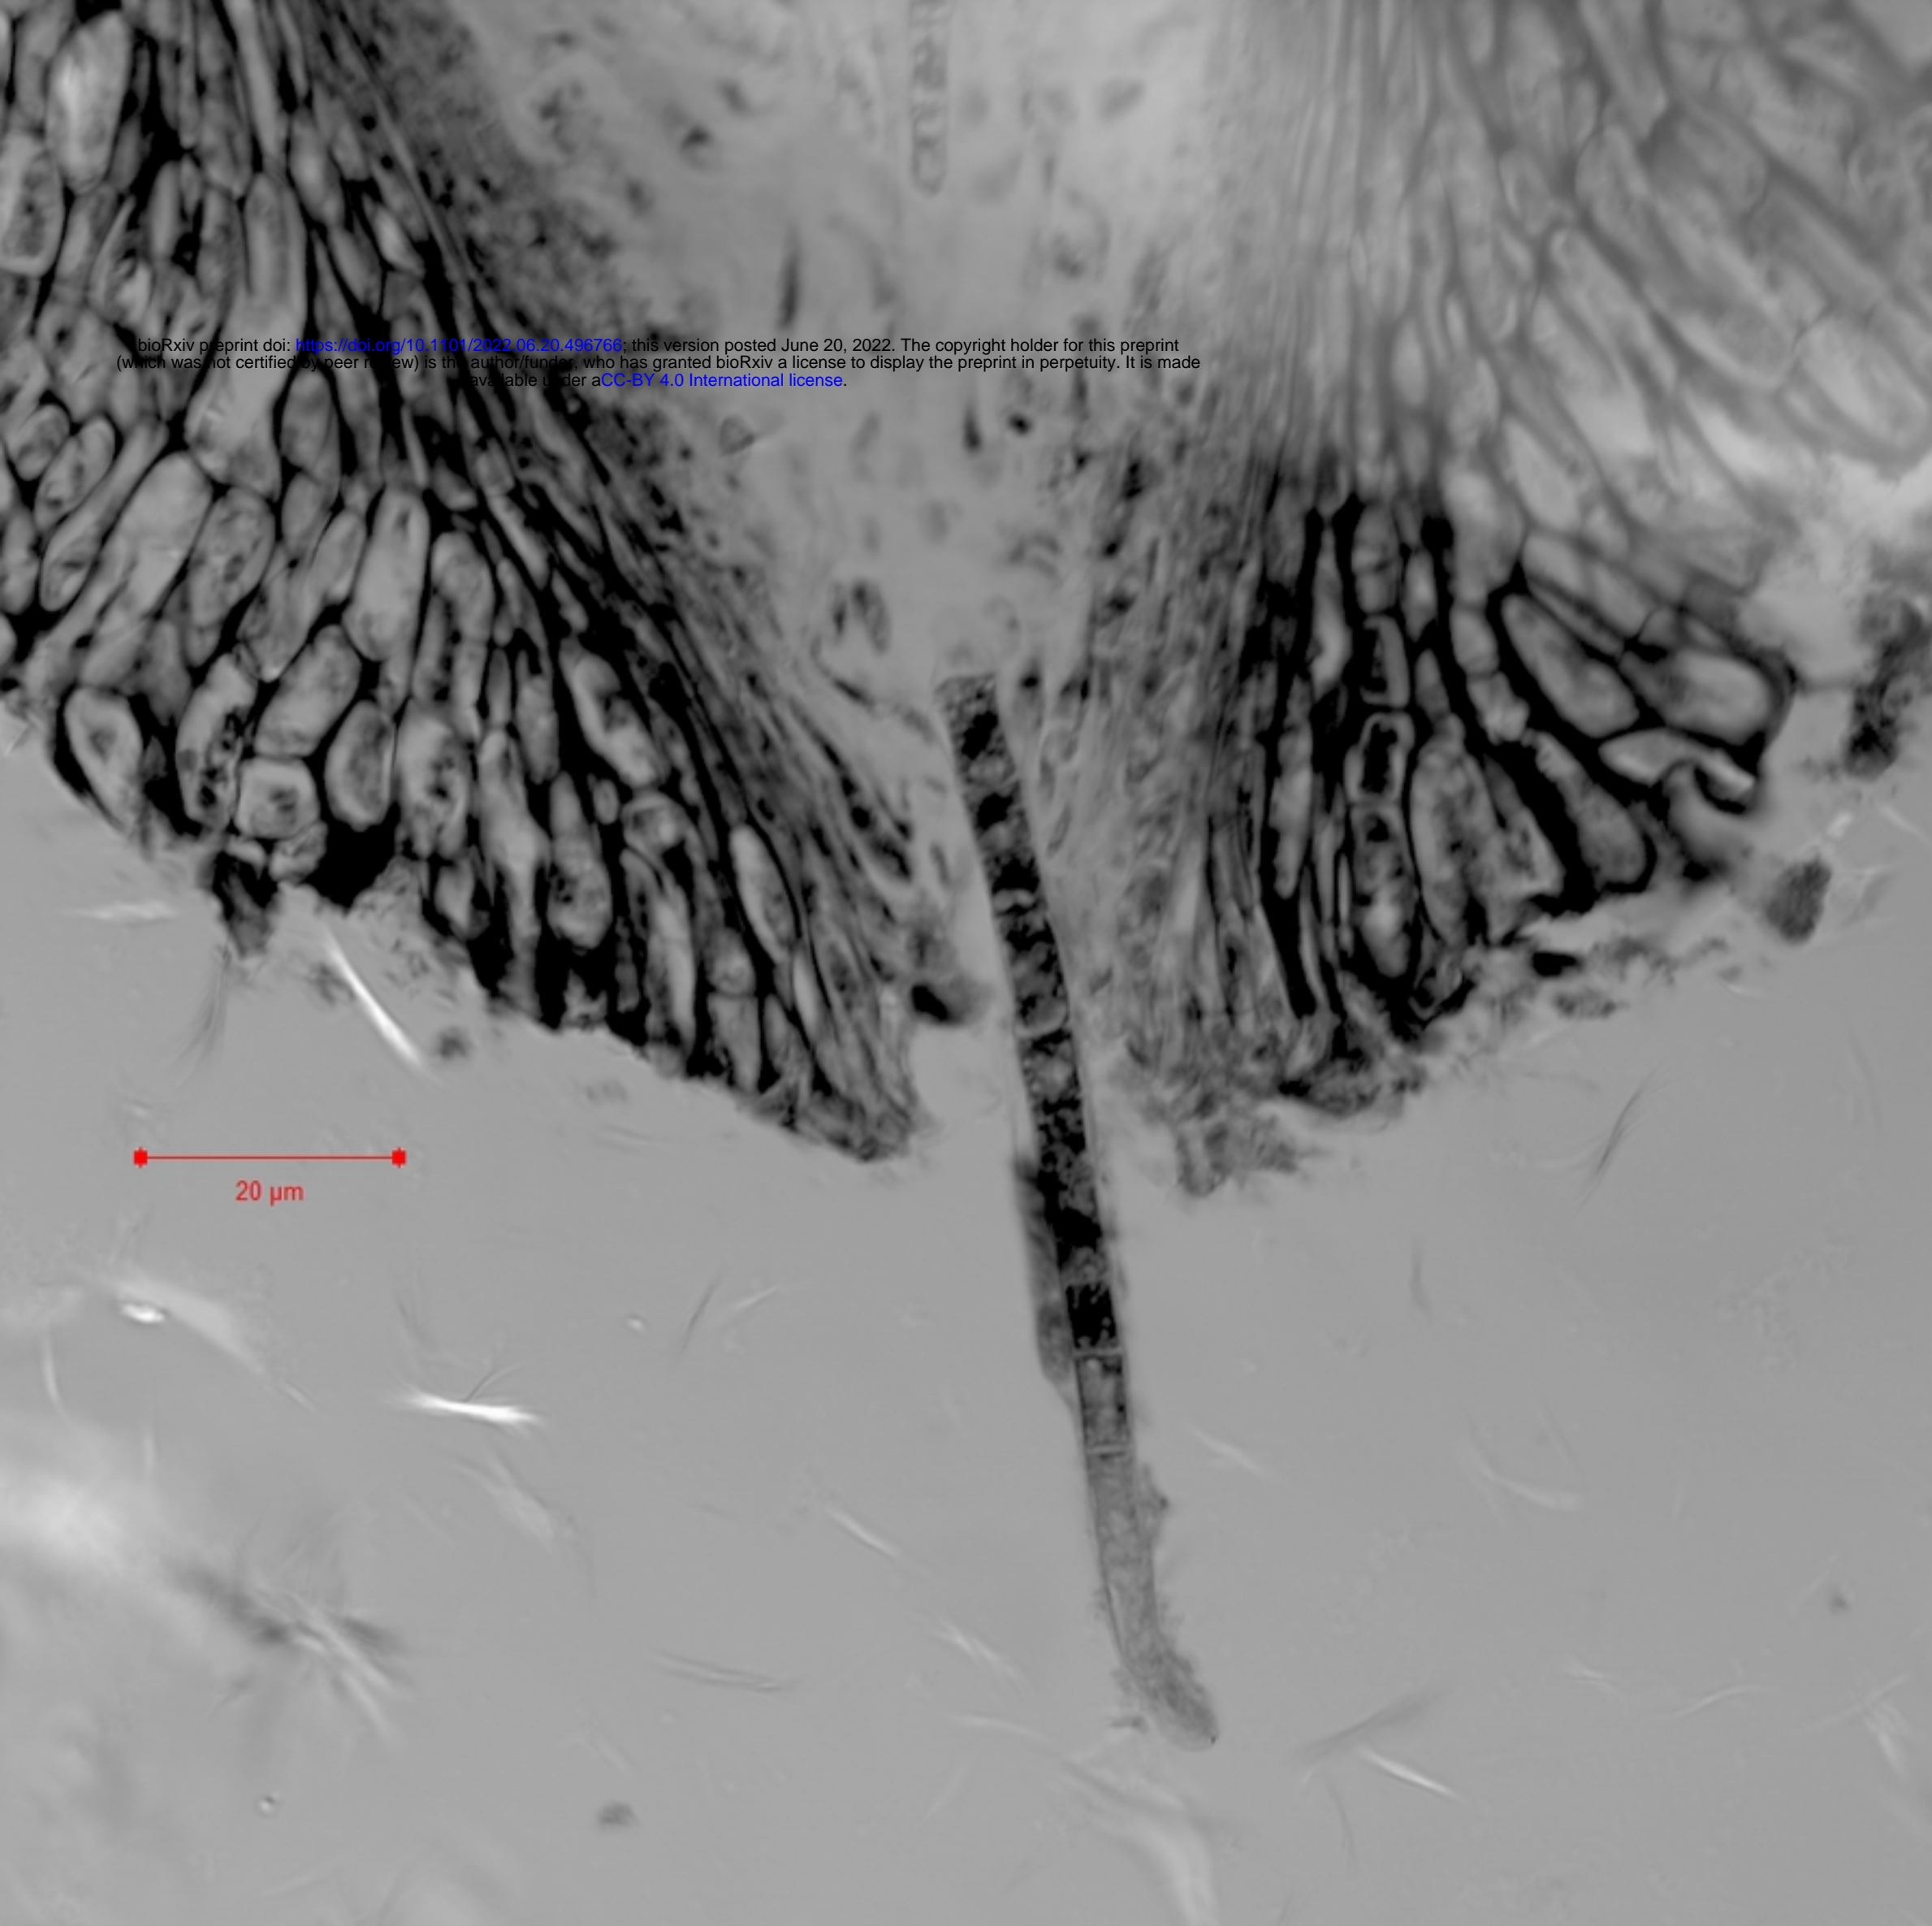

Figure 3E



1 *ITS5* *HsAtp1* *Hsprp1* 100  
GT1 AB067721 1 TAGAGGAAGTAAAAGTCGTAACAAGGCTCTCCGTTGGTGAACCCAGCGGAGGGATCATTATCGAGTCACCACTCCCAAACCCCTGCGAACACCACAGCAGT  
JAAVMX010000017 9695  
LKHE01000582 2074  
ANOV01021709 838  
LWBQ01000008 991739  
GT2 MG770309  
GT3 HM595984 1  
GT4 AB067744 1  
GT5 AB067740 1  
GT6 EU555436 1  
GT15 KT232017 1  
GT16 KT232019 1  
GT17 KT232010 1

101 *Hsprp2 (RC)* 200  
GT1 AB067721 101 TGCCTCGGCGGGACCGCCCCGGCGCCCCAGGGCCCGGACCAGGGCGCCCCCGGAGGACCCCGAGACCCTCCTGTGCGAGTGGCATCTCTCAGTCAAGAA  
JAAVMX010000017 9595  
LKHE01000582 2174  
ANOV01021709 938  
LWBQ01000008 991839  
GT2 MG770309 284  
GT3 HM595984 75  
GT4 AB067744 97  
GT5 AB067740 101  
GT6 EU555436 15  
GT15 KT232017 78  
GT16 KT232019 78  
GT17 KT232010 78

201 300  
GT1 AB067721 201 GCAAGCAAATGAATCAAAACTTTCAACAACGGATCTCTGGTCTGGCATCGATGAAGAACGCAGCGAAATGCGATAAGTAATGTGAATTGCAGAATTC  
JAAVMX010000017 9495  
LKHE01000582 2274  
ANOV01021709 1038  
LWBQ01000008 991939  
GT2 MG770309 245  
GT3 HM595984 175  
GT4 AB067744 197  
GT5 AB067740 201  
GT6 EU555436 115  
GT15 KT232017 178  
GT16 KT232019 178  
GT17 KT232010 178

301 *HsAtp2/HsAtp3 (RC)* 400  
GT1 AB067721 301 GTGAACCATCGAATCTTTGAACGCACATTGCGCCCGCCAGCACTCTGGCGGGCATGCCTGTCCGAGCGTCATCTCAACCCCTCGAGCCCCCGCCTCGCGG  
JAAVMX010000017 9395  
LKHE01000582 2374  
ANOV01021709 1138  
LWBQ01000008 992039  
GT2 MG770309 146  
GT3 HM595984 275  
GT4 AB067744 297  
GT5 AB067740 301  
GT6 EU555436 215  
GT15 KT232017 278  
GT16 KT232019 278  
GT17 KT232010 278

401 *Hsprp3 (RC)* 500  
GT1 AB067721 401 CGGCGGGGCCCCGGCCTTGGGGGTACGGCCCGCGCCGCCCTAAACGCAGTGGCGACCCCGCGGGCTCCCTGCGCAGTAGCTCGCTGAG AACCT  
JAAVMX010000017 9295  
LKHE01000582 2474  
ANOV01021709 1238  
LWBQ01000008 992139  
GT2 MG770309 46  
GT3 HM595984 375  
GT4 AB067744 397  
GT5 AB067740 401  
GT6 EU555436 315  
GT15 KT232017 378  
GT16 KT232019 378  
GT17 KT232010 378

501 *ITS4 (RC)* 600  
GT1 AB067721 500 CGCACCGGGAGCGCGGAGGGGTCACGCCGTAAACCACCACCCCTCCAGTTGACCTCGGATCAGGTAGGGATACCCGCTGAACTTAAAGCATATCAATA  
JAAVMX010000017 9194  
LKHE01000582 2573  
ANOV01021709 1337  
LWBQ01000008 992238  
GT2 MG770309 1  
GT3 HM595984 475  
GT4 AB067744 496  
GT5 AB067740 500  
GT6 EU555436 414  
GT15 KT232017 477  
GT16 KT232019 477  
GT17 KT232010 477

601 686  
GT1 AB067721 600 AGCGGAGGAAAAGAAACCAACAGGGATTGCCCCAGTAACGGCGAGTGAAGCGGCAACAGCTCAAATTT  
JAAVMX010000017 9094  
LKHE01000582 2673  
ANOV01021709 1437  
LWBQ01000008 992338  
GT2 MG770309 1  
GT3 HM595984 518  
GT4 AB067744 596  
GT5 AB067740 600  
GT6 EU555436 467  
GT15 KT232017 577  
GT16 KT232019 577  
GT17 KT232010 577

Figure 4



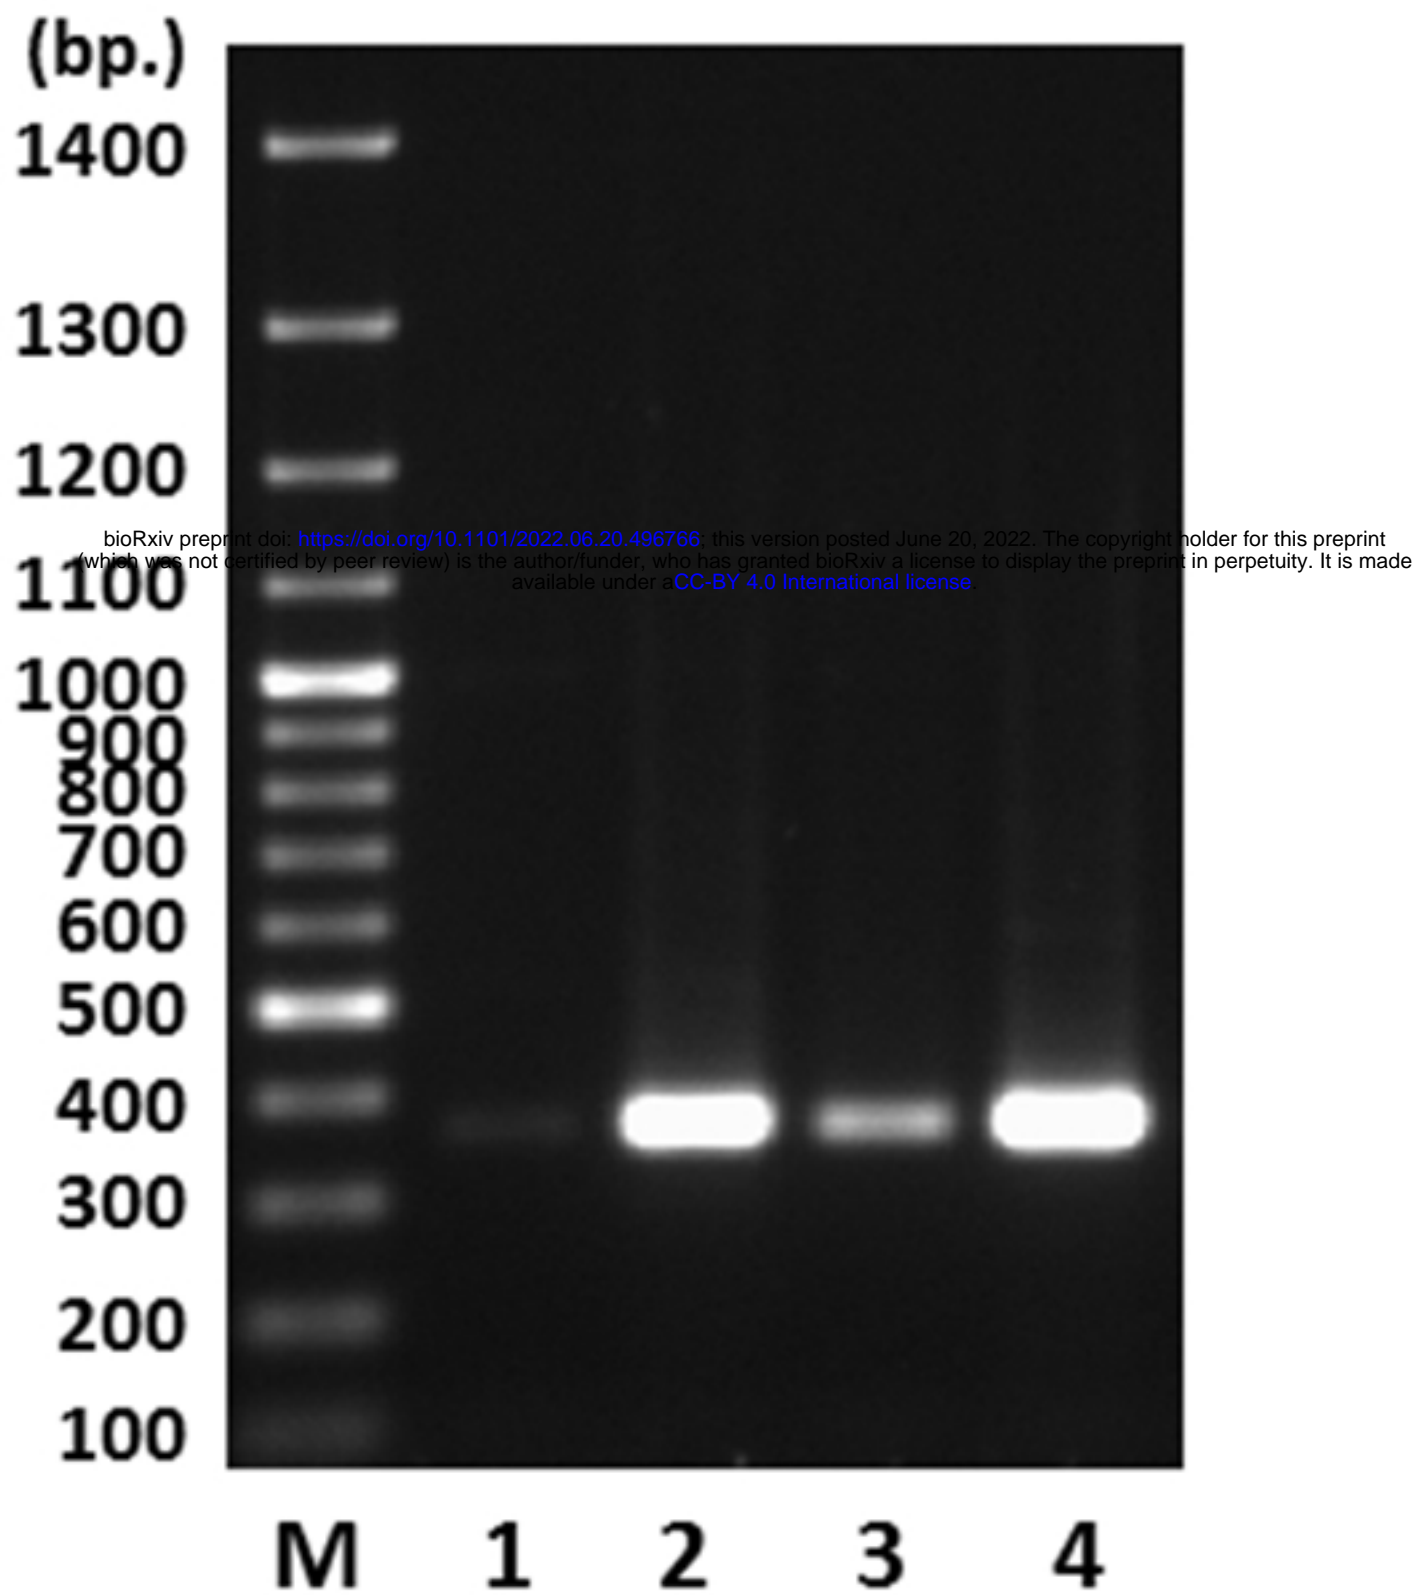

Figure 5

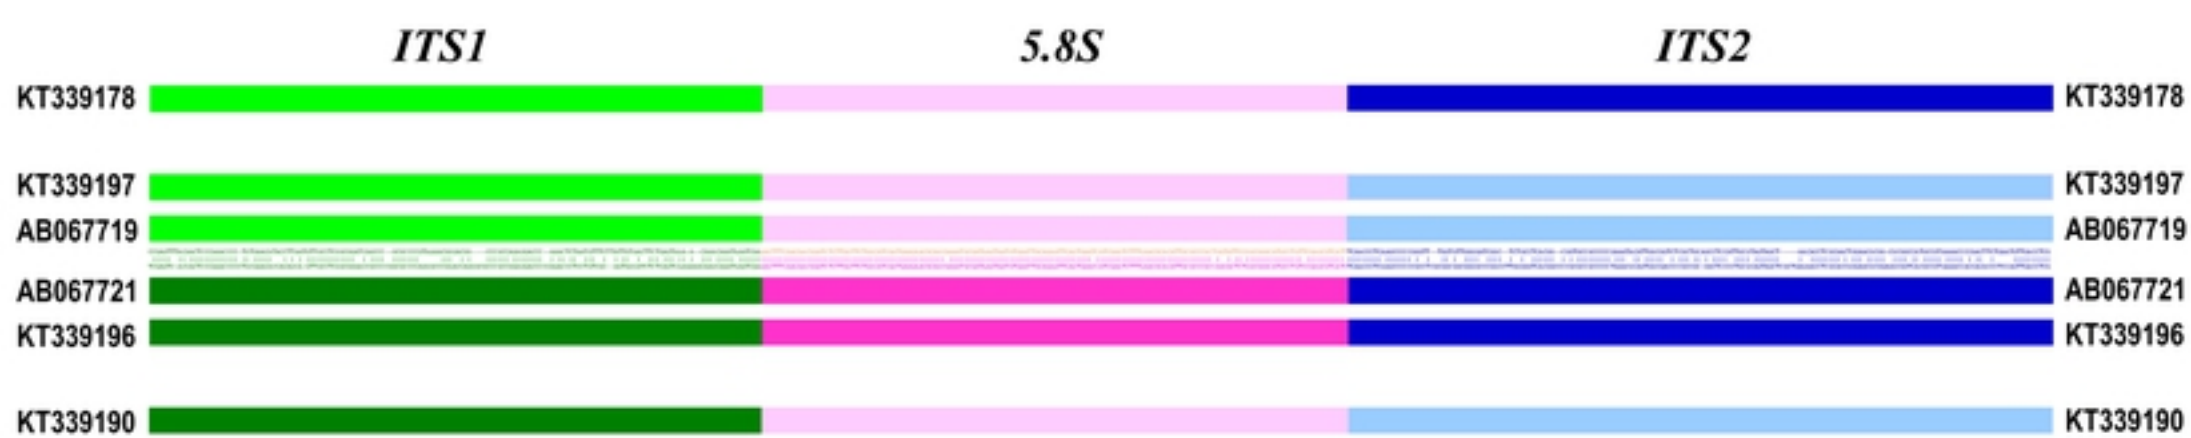

Figure 6

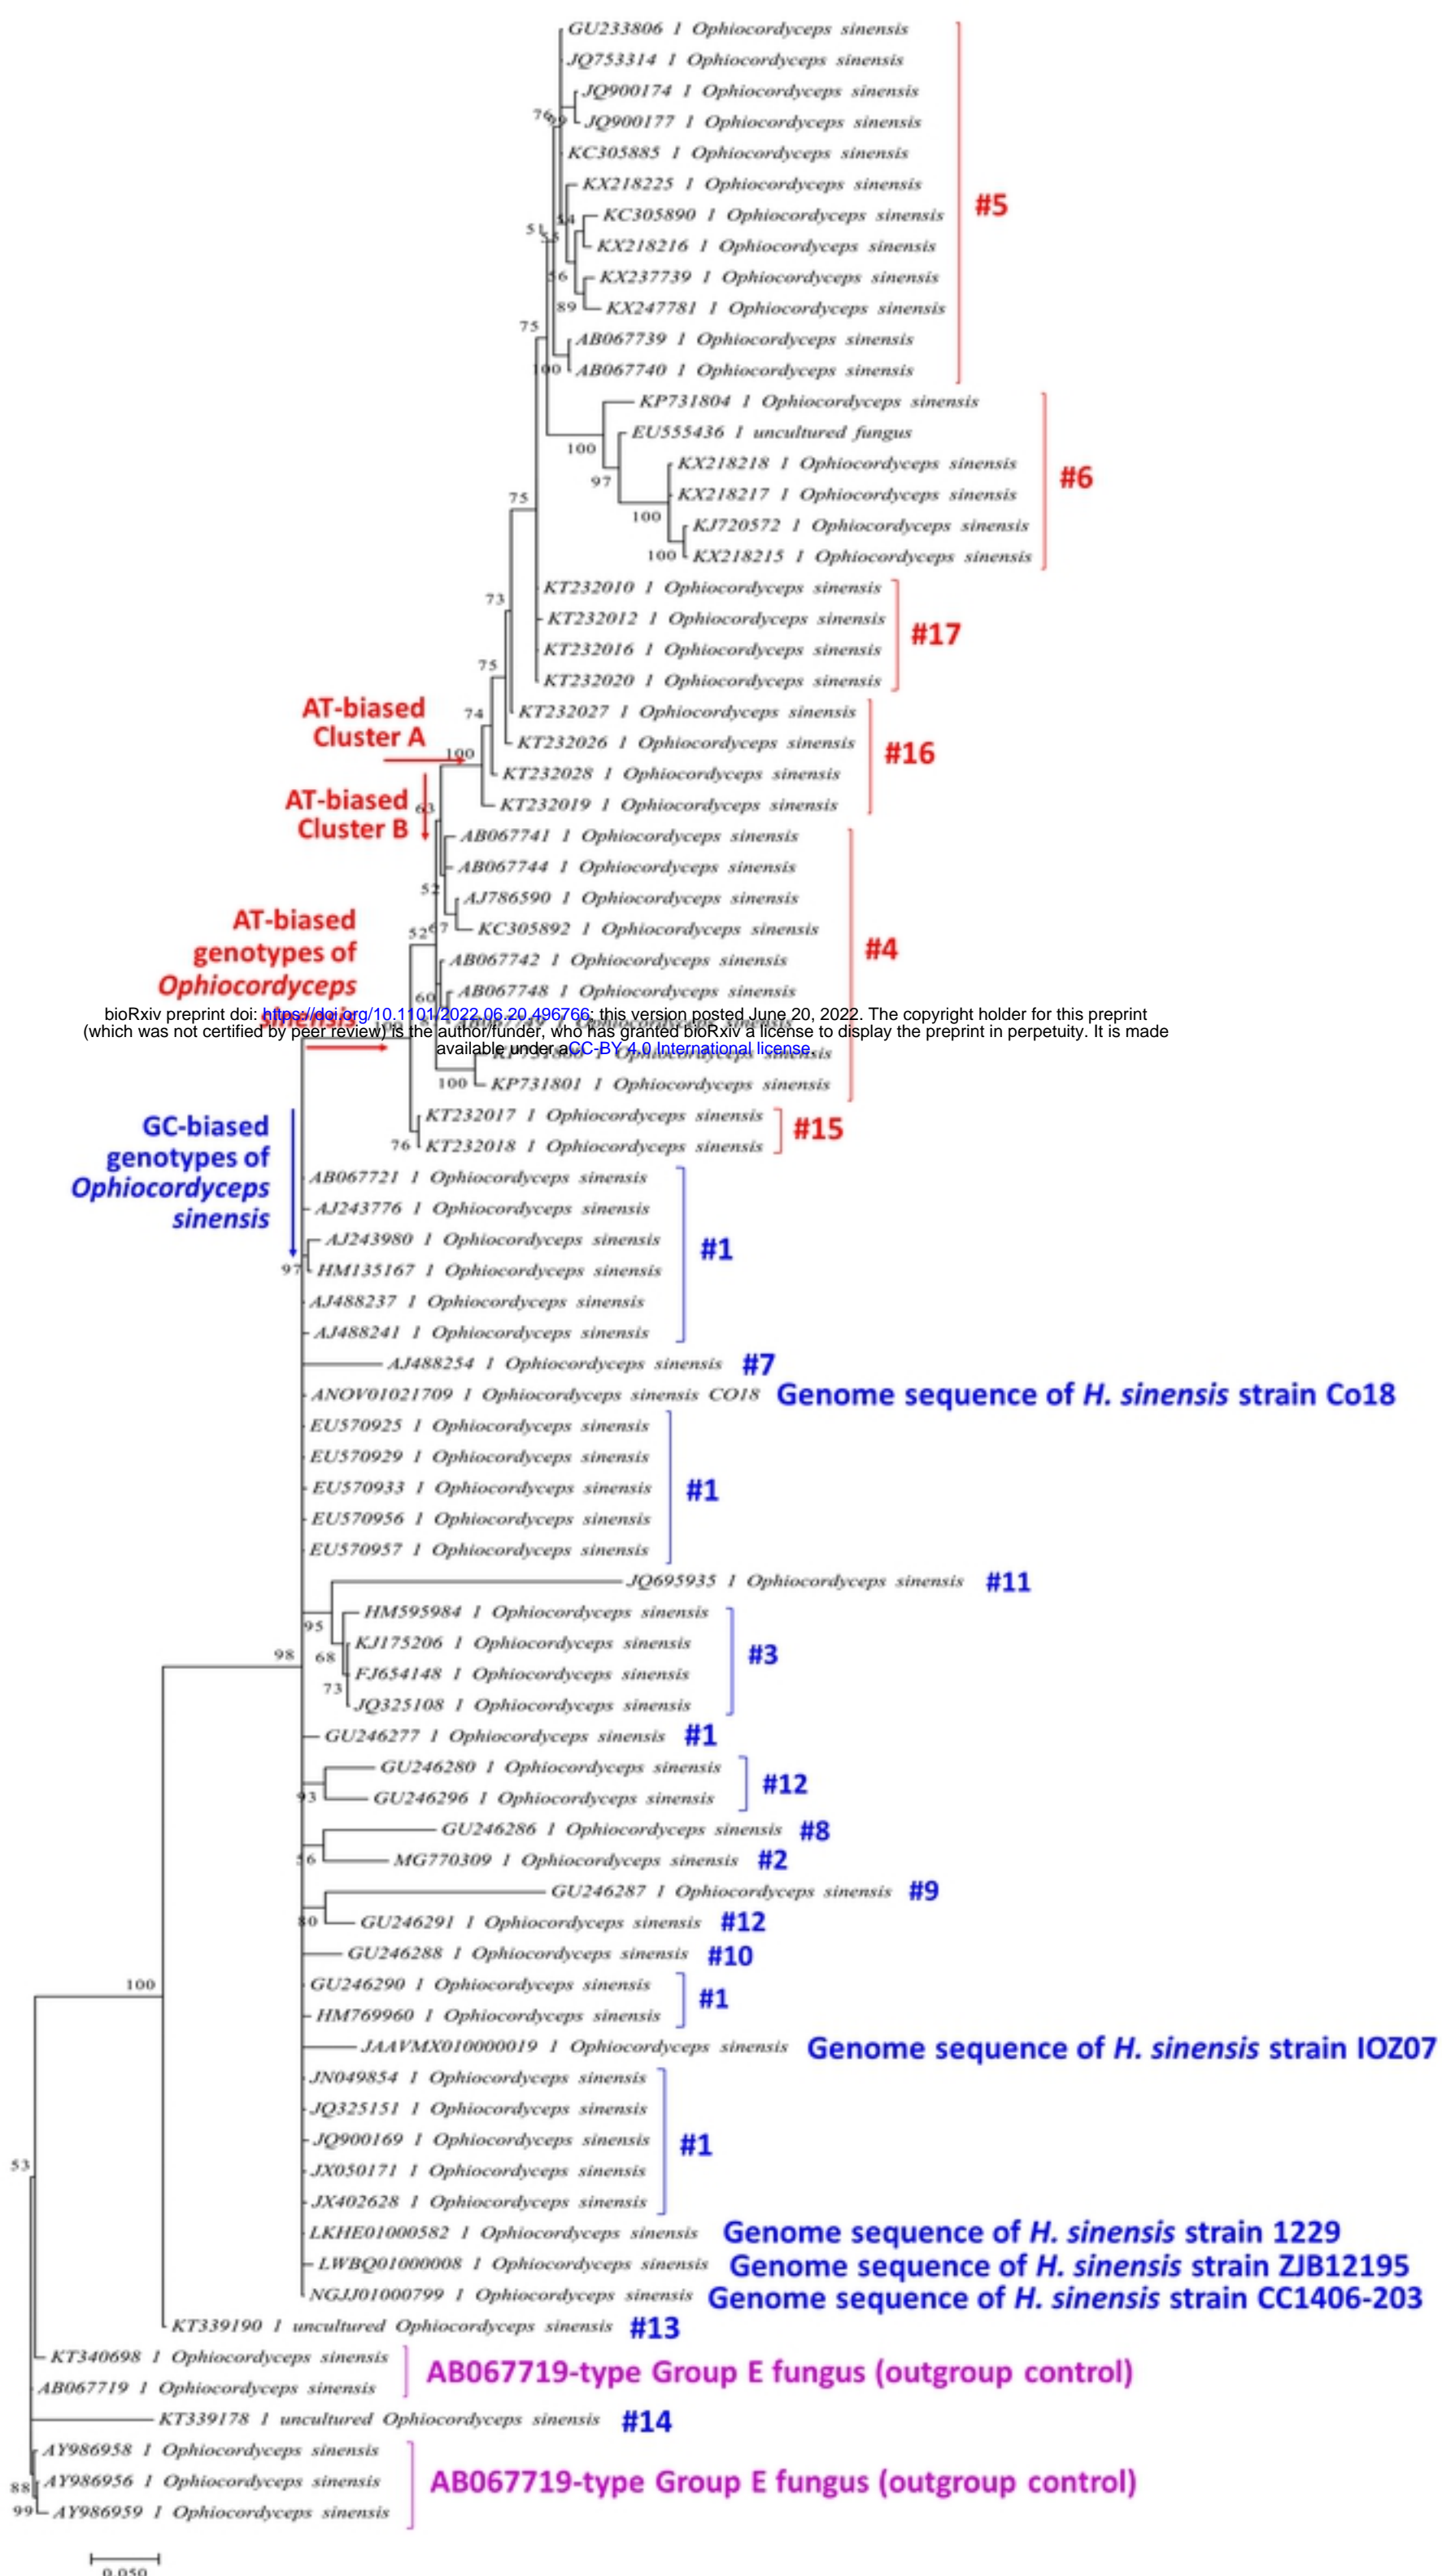

Figure 7

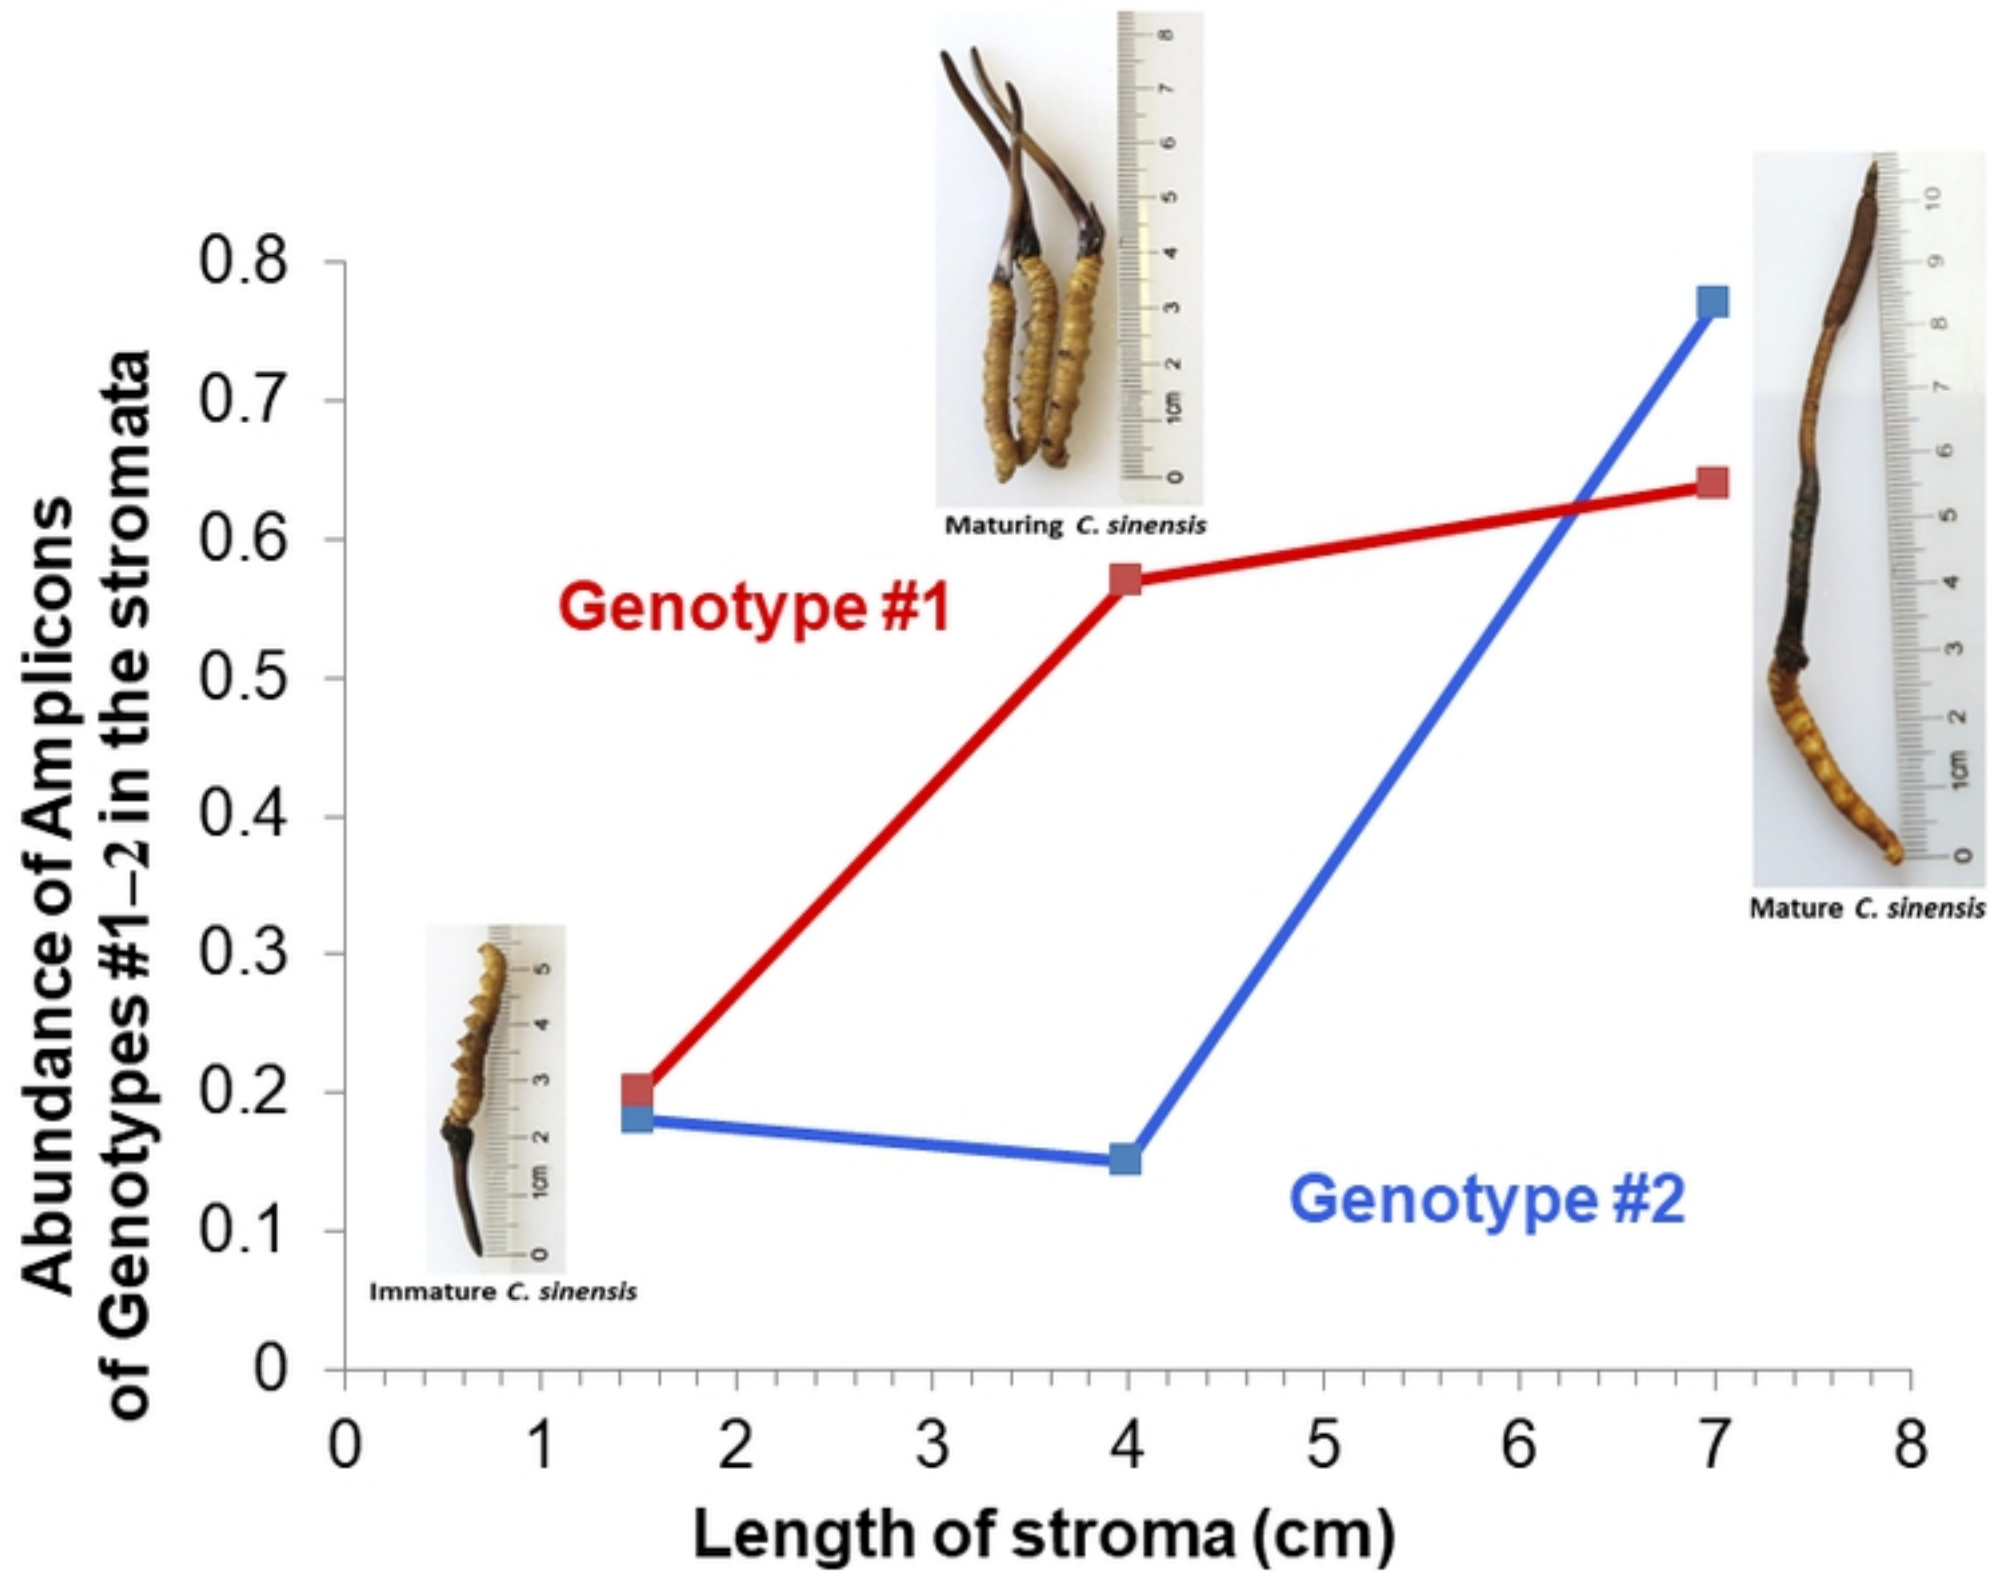

Figure 8
